# Supplementary material
Source: publisher site journal article supplement (https://www.dovepress.com/article/607785)
Supplement: Supplementary file 1 [file Appendix A.pdf › Appendix A.pdf]

## Q1 Dean's Office

Answered: 76 Skipped: 0

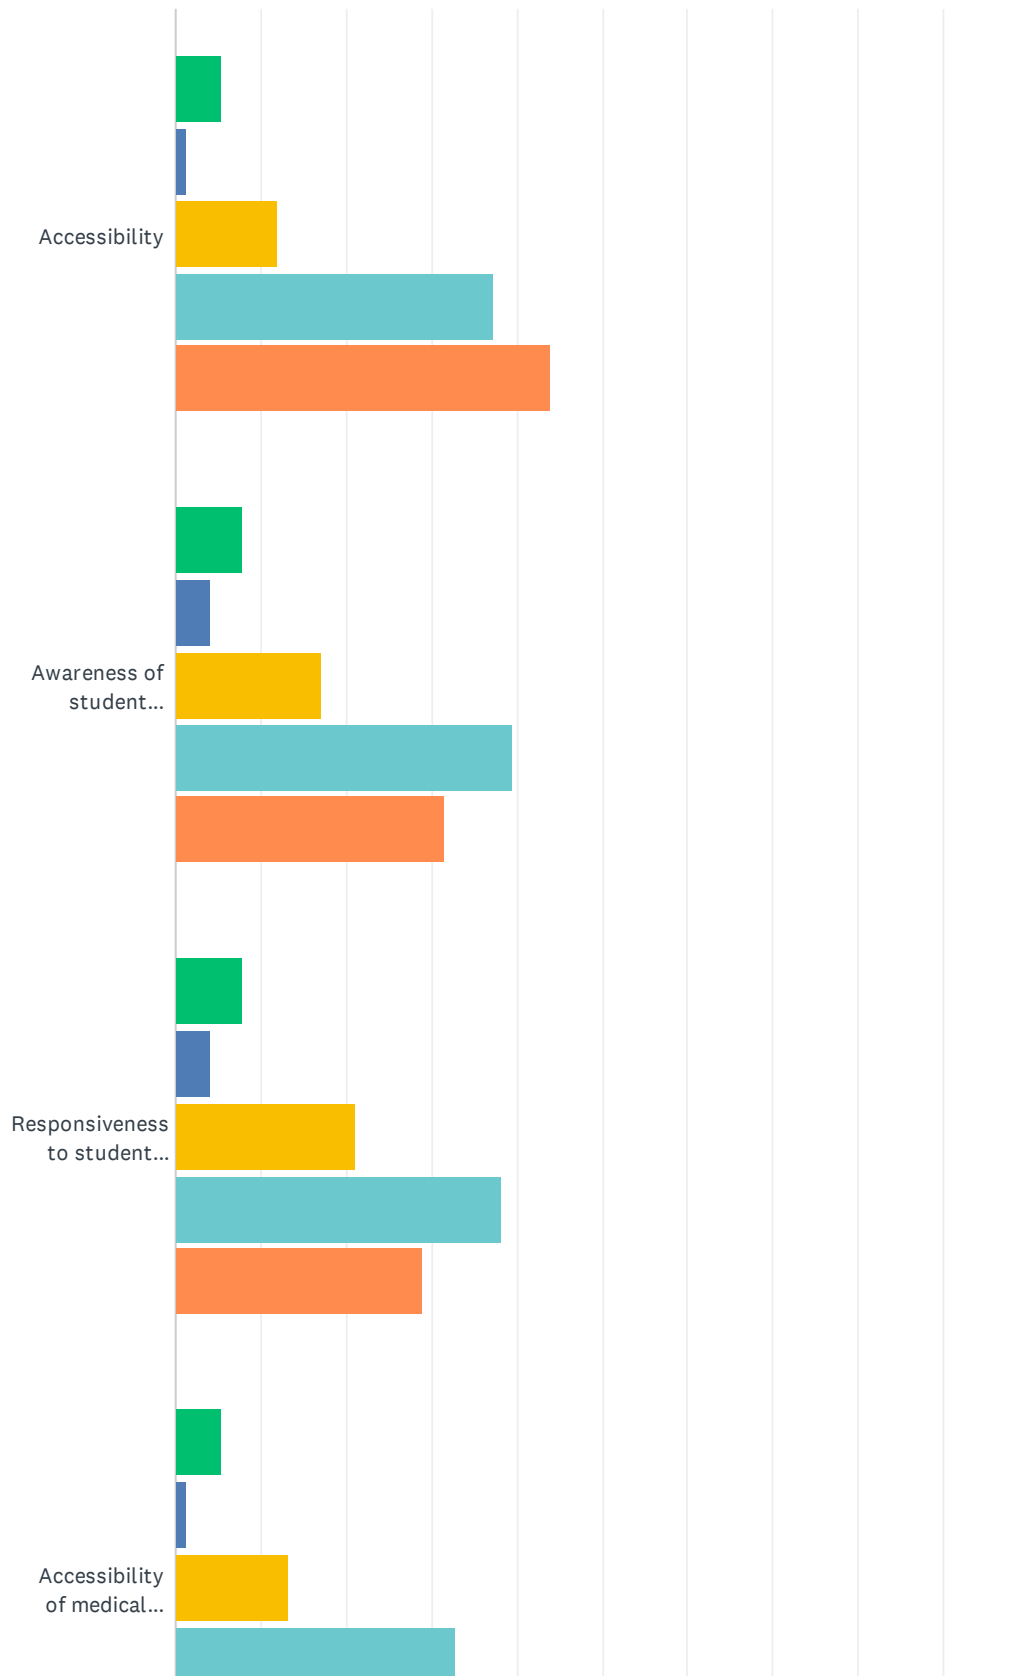

## Basic Science Program - Institutional Self Study Survey

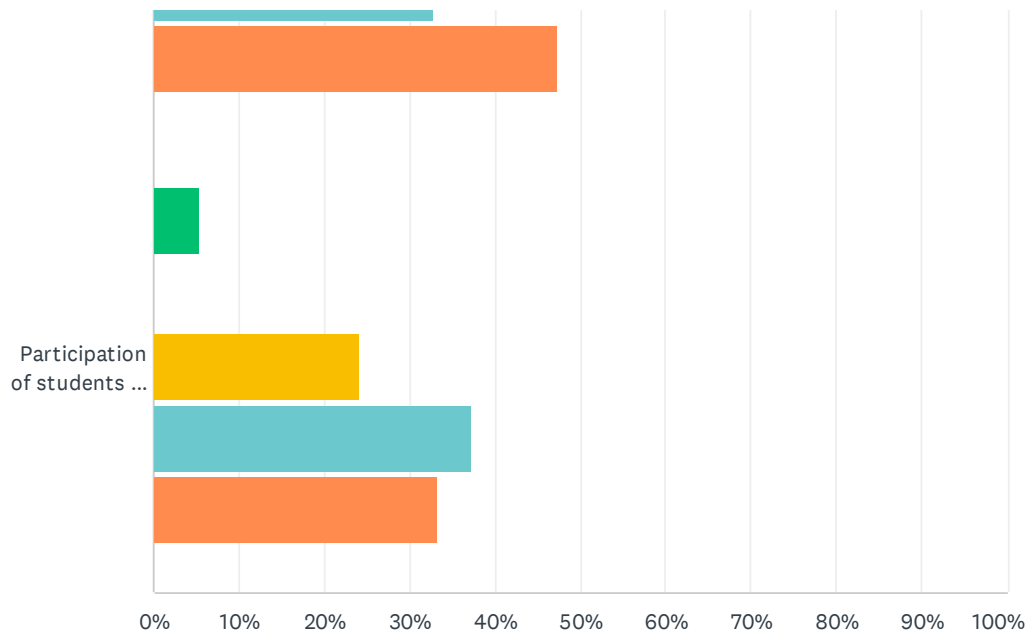

■ Very Dissatisfied
 ■ Dissatisfied
 ■ Neutral
 ■ Satisfied
 ■ Very Satisfied

|                                                            | VERY DISSATISFIED | DISSATISFIED | NEUTRAL      | SATISFIED    | VERY SATISFIED | TOTAL | WEIGHTED AVERAGE |
|------------------------------------------------------------|-------------------|--------------|--------------|--------------|----------------|-------|------------------|
| Accessibility                                              | 5.33%<br>4        | 1.33%<br>1   | 12.00%<br>9  | 37.33%<br>28 | 44.00%<br>33   | 75    | 4.13             |
| Awareness of student concerns                              | 7.89%<br>6        | 3.95%<br>3   | 17.11%<br>13 | 39.47%<br>30 | 31.58%<br>24   | 76    | 3.83             |
| Responsiveness to student problems                         | 7.89%<br>6        | 3.95%<br>3   | 21.05%<br>16 | 38.16%<br>29 | 28.95%<br>22   | 76    | 3.76             |
| Accessibility of medical school faculty                    | 5.26%<br>4        | 1.32%<br>1   | 13.16%<br>10 | 32.89%<br>25 | 47.37%<br>36   | 76    | 4.16             |
| Participation of students on key medical school committees | 5.33%<br>4        | 0.00%<br>0   | 24.00%<br>18 | 37.33%<br>28 | 33.33%<br>25   | 75    | 3.93             |

## Q2 LEARNING ENVIRONMENT AND FACILITIES

Answered: 76 Skipped: 0

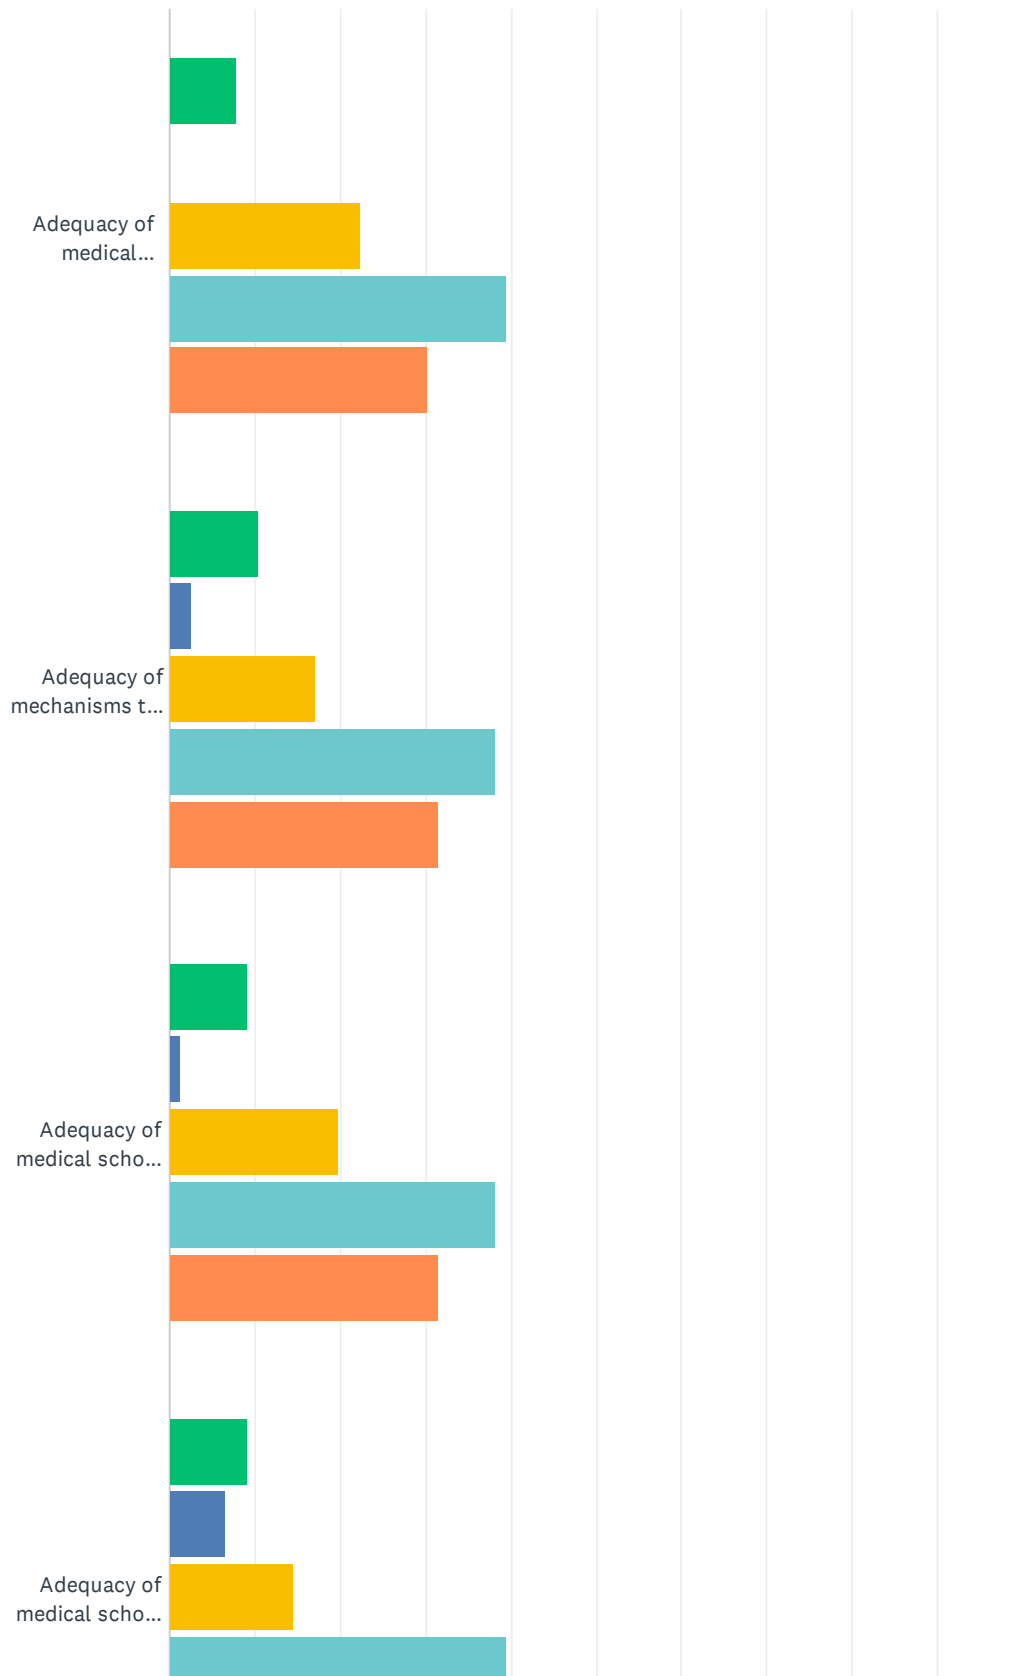

## Basic Science Program - Institutional Self Study Survey

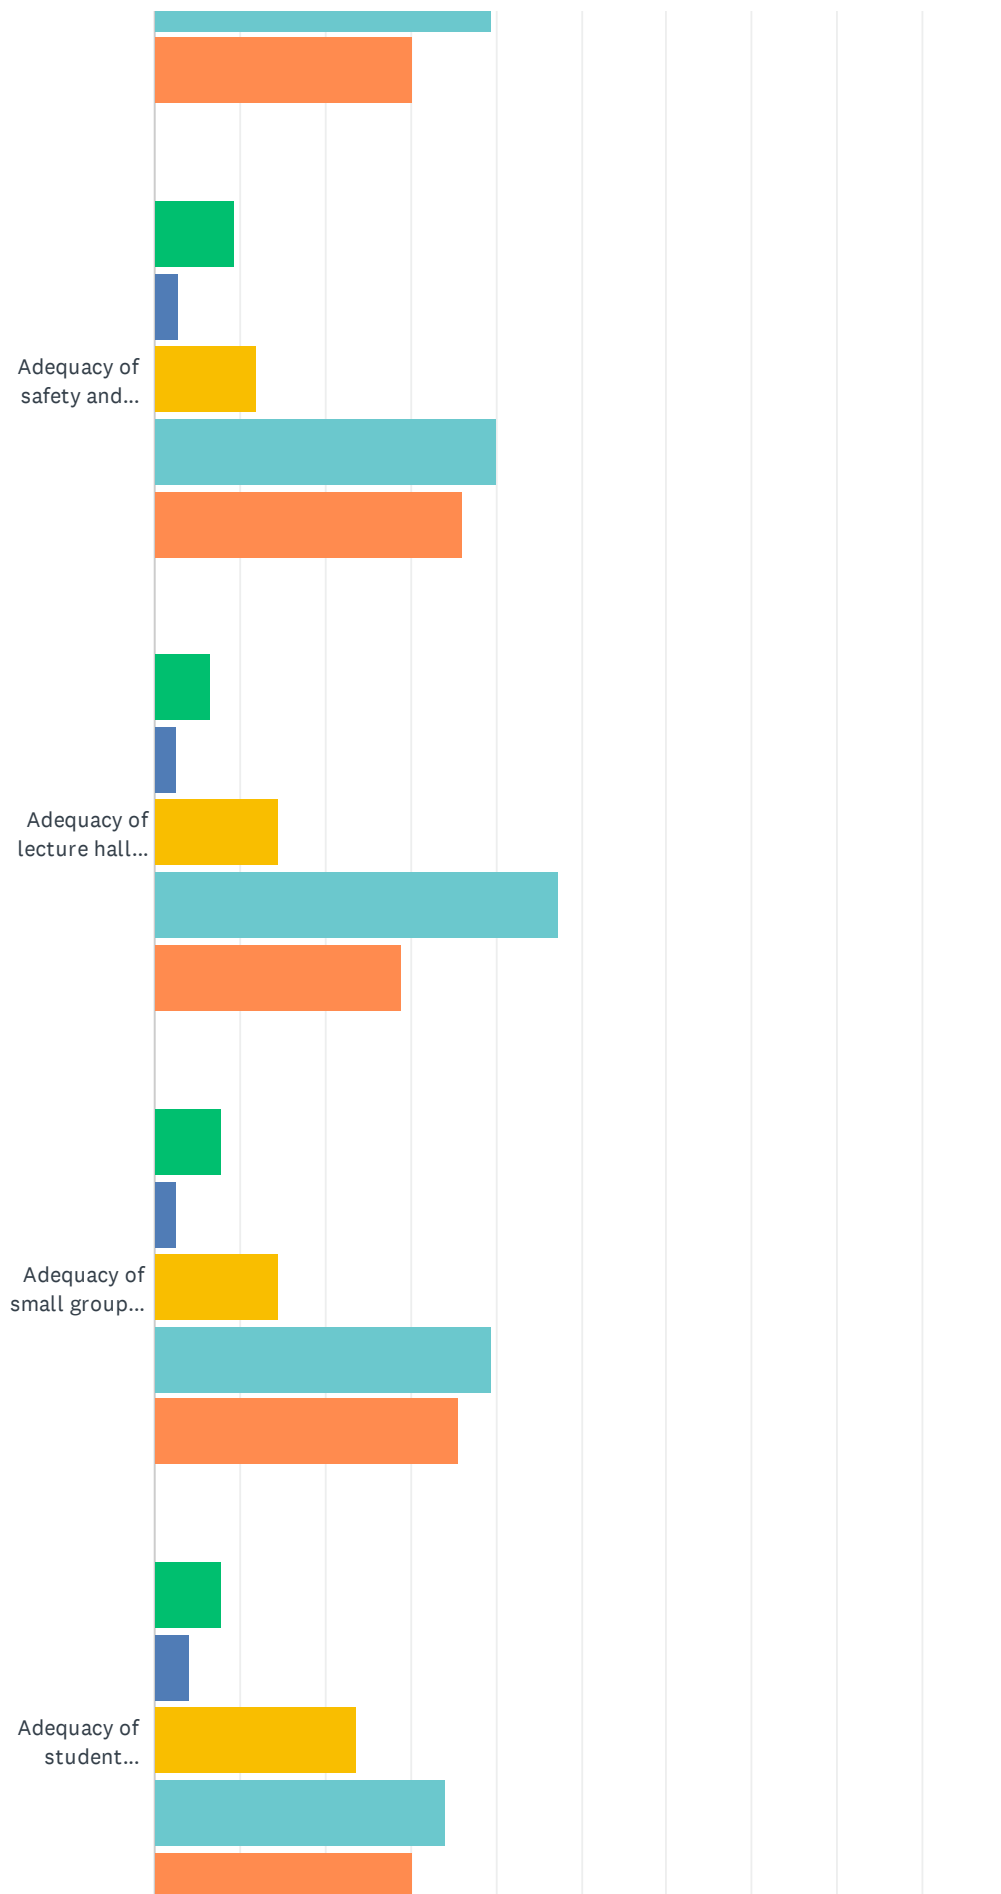

## Basic Science Program - Institutional Self Study Survey

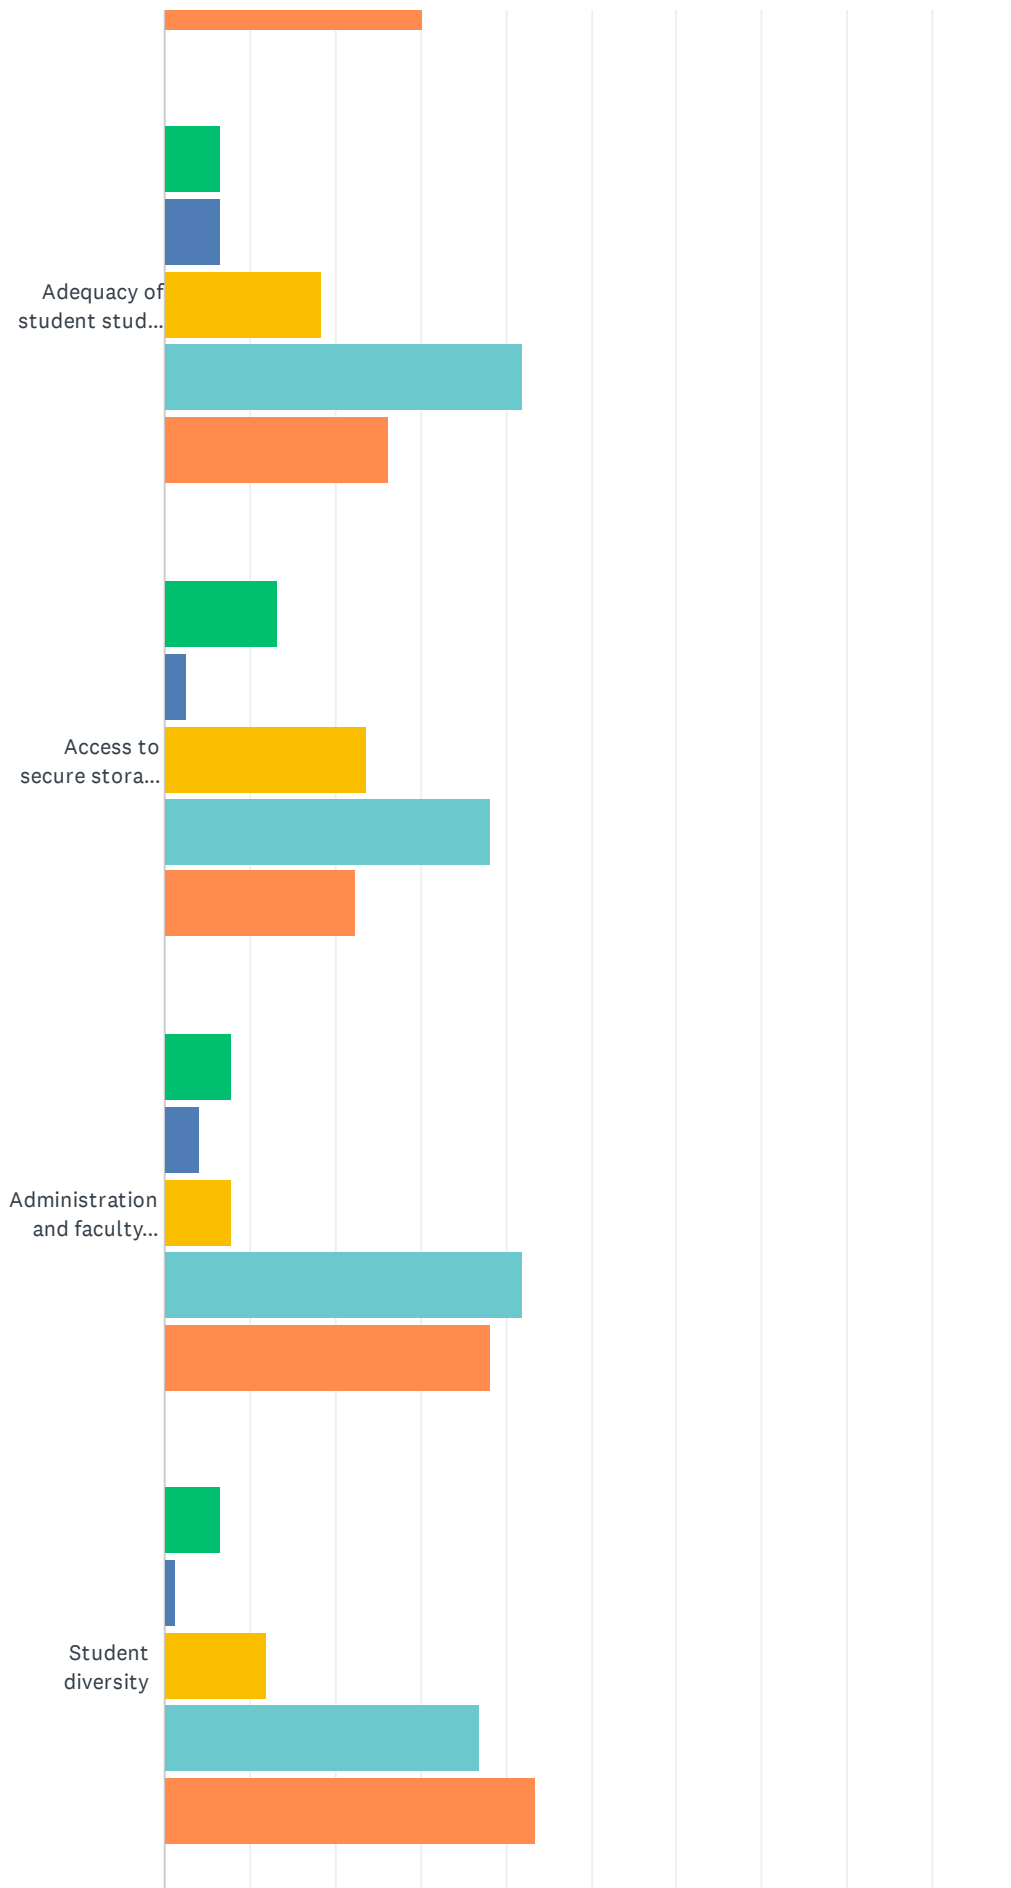

## Basic Science Program - Institutional Self Study Survey

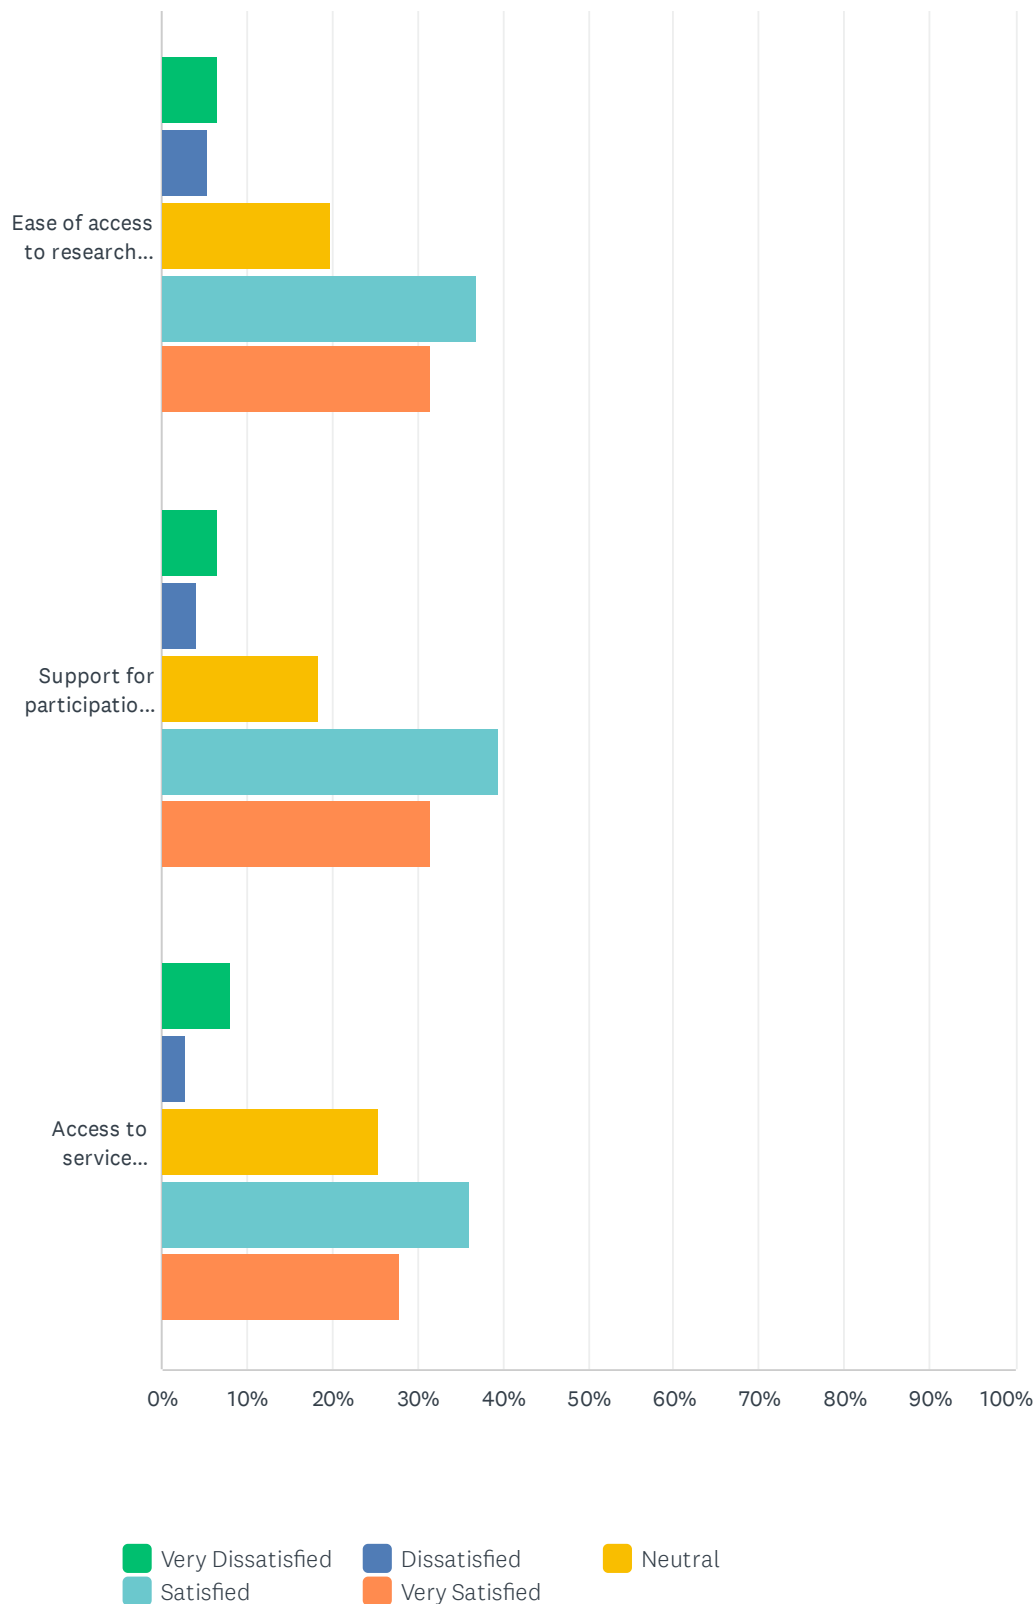

# Basic Science Program - Institutional Self Study Survey

|                                                                                     | VERY<br>DISSATISFIED | DISSATISFIED | NEUTRAL      | SATISFIED    | VERY<br>SATISFIED | TOTAL | WEIGHTED<br>AVERAGE |
|-------------------------------------------------------------------------------------|----------------------|--------------|--------------|--------------|-------------------|-------|---------------------|
| Adequacy of medical school's student mistreatment policy                            | 7.89%<br>6           | 0.00%<br>0   | 22.37%<br>17 | 39.47%<br>30 | 30.26%<br>23      | 76    | 3.84                |
| Adequacy of mechanisms to report mistreatment                                       | 10.53%<br>8          | 2.63%<br>2   | 17.11%<br>13 | 38.16%<br>29 | 31.58%<br>24      | 76    | 3.78                |
| Adequacy of medical school activities to prevent mistreatment                       | 9.21%<br>7           | 1.32%<br>1   | 19.74%<br>15 | 38.16%<br>29 | 31.58%<br>24      | 76    | 3.82                |
| Adequacy of medical school actions on reports of mistreatment                       | 9.21%<br>7           | 6.58%<br>5   | 14.47%<br>11 | 39.47%<br>30 | 30.26%<br>23      | 76    | 3.75                |
| Adequacy of safety and security at medical school campus                            | 9.33%<br>7           | 2.67%<br>2   | 12.00%<br>9  | 40.00%<br>30 | 36.00%<br>27      | 75    | 3.91                |
| Adequacy of lecture halls, large group classroom facilities                         | 6.58%<br>5           | 2.63%<br>2   | 14.47%<br>11 | 47.37%<br>36 | 28.95%<br>22      | 76    | 3.89                |
| Adequacy of small group teaching spaces on campus                                   | 7.89%<br>6           | 2.63%<br>2   | 14.47%<br>11 | 39.47%<br>30 | 35.53%<br>27      | 76    | 3.92                |
| Adequacy of student relaxation space at the medical school campus                   | 7.89%<br>6           | 3.95%<br>3   | 23.68%<br>18 | 34.21%<br>26 | 30.26%<br>23      | 76    | 3.75                |
| Adequacy of student study space at the medical school campus                        | 6.58%<br>5           | 6.58%<br>5   | 18.42%<br>14 | 42.11%<br>32 | 26.32%<br>20      | 76    | 3.75                |
| Access to secure storage space for personal belongings at the medical school campus | 13.16%<br>10         | 2.63%<br>2   | 23.68%<br>18 | 38.16%<br>29 | 22.37%<br>17      | 76    | 3.54                |
| Administration and faculty diversity                                                | 7.89%<br>6           | 3.95%<br>3   | 7.89%<br>6   | 42.11%<br>32 | 38.16%<br>29      | 76    | 3.99                |
| Student diversity                                                                   | 6.58%<br>5           | 1.32%<br>1   | 11.84%<br>9  | 36.84%<br>28 | 43.42%<br>33      | 76    | 4.09                |
| Ease of access to research opportunities                                            | 6.58%<br>5           | 5.26%<br>4   | 19.74%<br>15 | 36.84%<br>28 | 31.58%<br>24      | 76    | 3.82                |
| Support for participation in research                                               | 6.58%<br>5           | 3.95%<br>3   | 18.42%<br>14 | 39.47%<br>30 | 31.58%<br>24      | 76    | 3.86                |
| Access to service learning/community service opportunities                          | 8.00%<br>6           | 2.67%<br>2   | 25.33%<br>19 | 36.00%<br>27 | 28.00%<br>21      | 75    | 3.73                |

## Q3 LIBRARY AND INFORMATION RESOURCES

Answered: 75   Skipped: 1

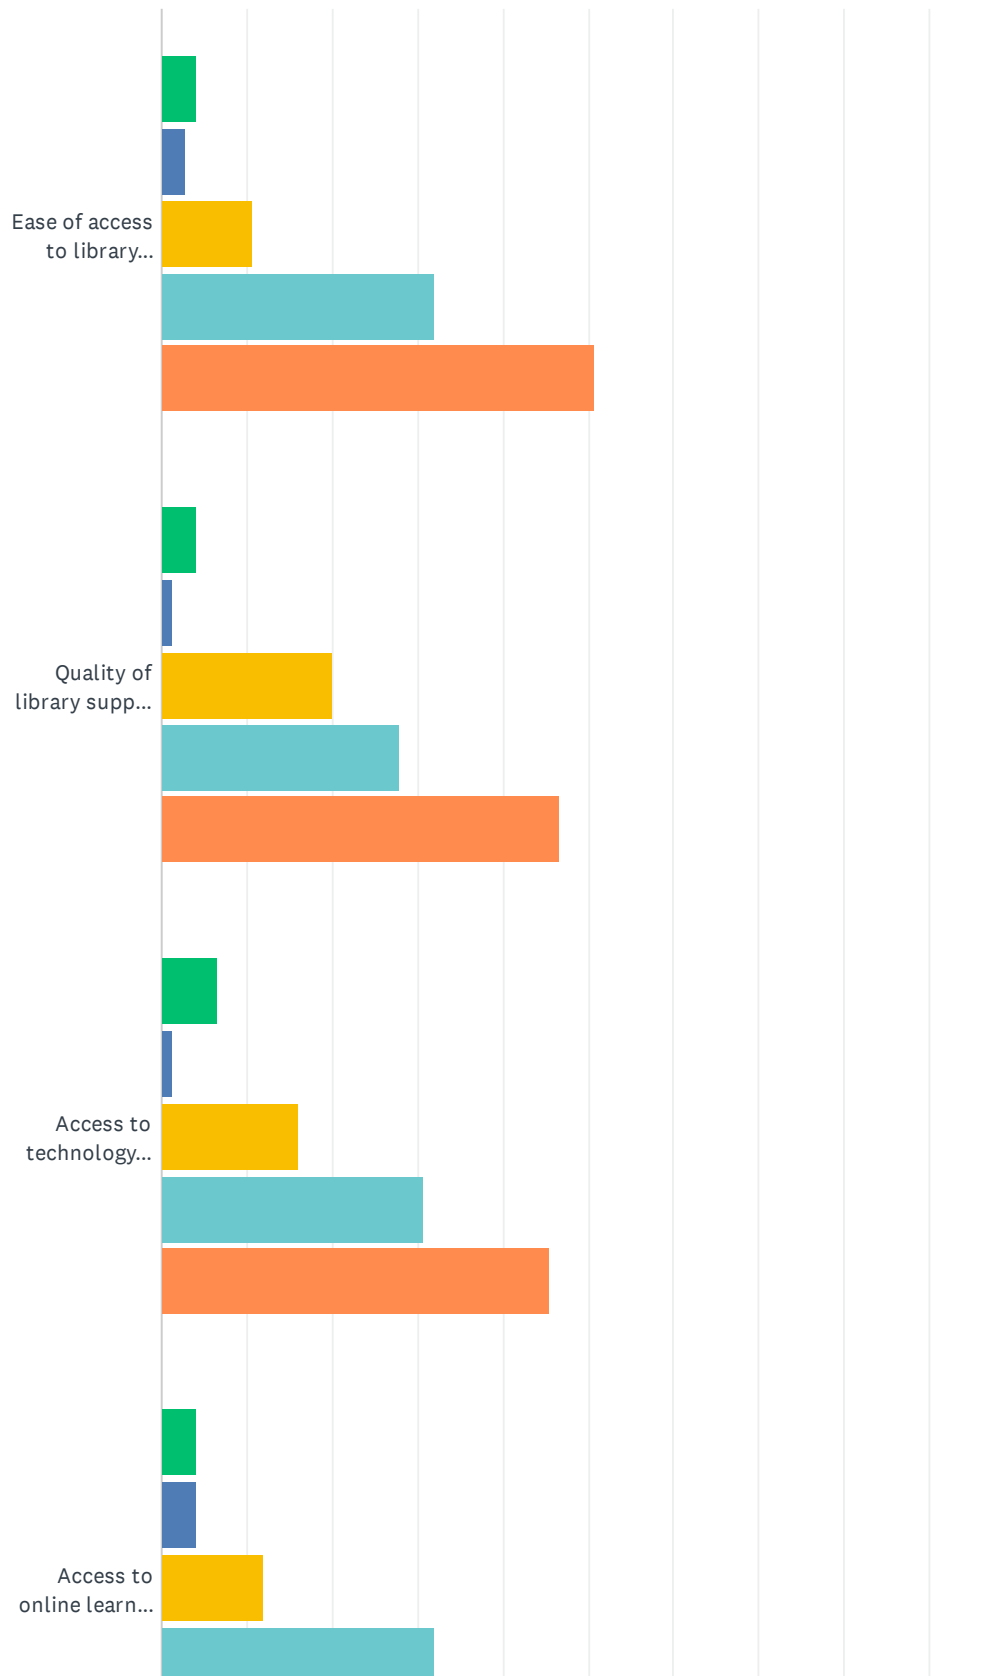



## Basic Science Program - Institutional Self Study Survey

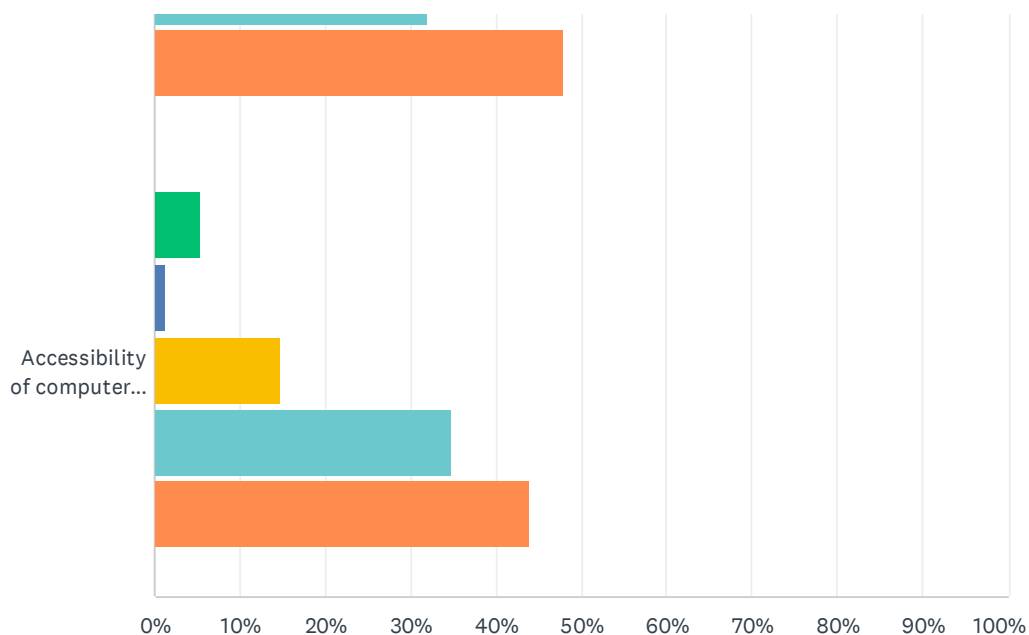

■ Very Dissatisfied
 ■ Dissatisfied
 ■ Neutral
 ■ Satisfied
 ■ Very Satisfied

|                                                  | VERY DISSATISFIED | DISSATISFIED | NEUTRAL      | SATISFIED    | VERY SATISFIED | TOTAL | WEIGHTED AVERAGE |
|--------------------------------------------------|-------------------|--------------|--------------|--------------|----------------|-------|------------------|
| Ease of access to library resources and holdings | 4.00%<br>3        | 2.67%<br>2   | 10.67%<br>8  | 32.00%<br>24 | 50.67%<br>38   | 75    | 4.23             |
| Quality of library support and services          | 4.00%<br>3        | 1.33%<br>1   | 20.00%<br>15 | 28.00%<br>21 | 46.67%<br>35   | 75    | 4.12             |
| Access to technology support                     | 6.67%<br>5        | 1.33%<br>1   | 16.00%<br>12 | 30.67%<br>23 | 45.33%<br>34   | 75    | 4.07             |
| Access to online learning resources              | 4.00%<br>3        | 4.00%<br>3   | 12.00%<br>9  | 32.00%<br>24 | 48.00%<br>36   | 75    | 4.16             |
| Accessibility of computer support                | 5.33%<br>4        | 1.33%<br>1   | 14.67%<br>11 | 34.67%<br>26 | 44.00%<br>33   | 75    | 4.11             |

## Q4 STUDENT SERVICES

Answered: 75   Skipped: 1

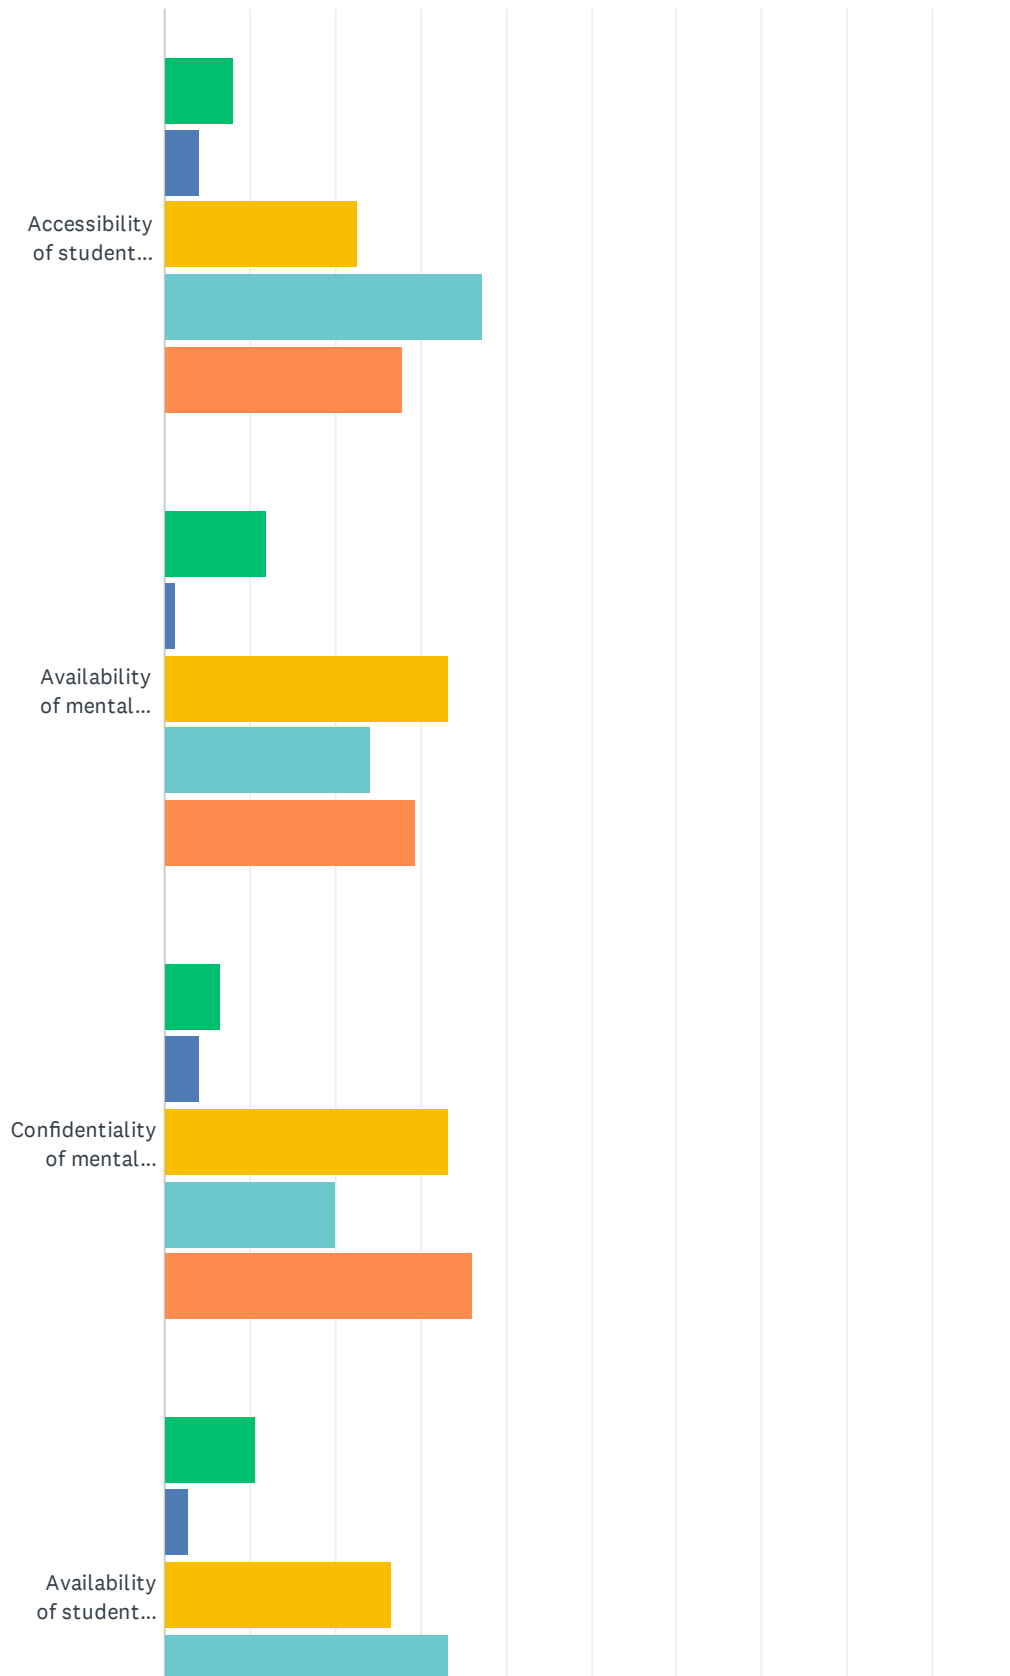

## Basic Science Program - Institutional Self Study Survey

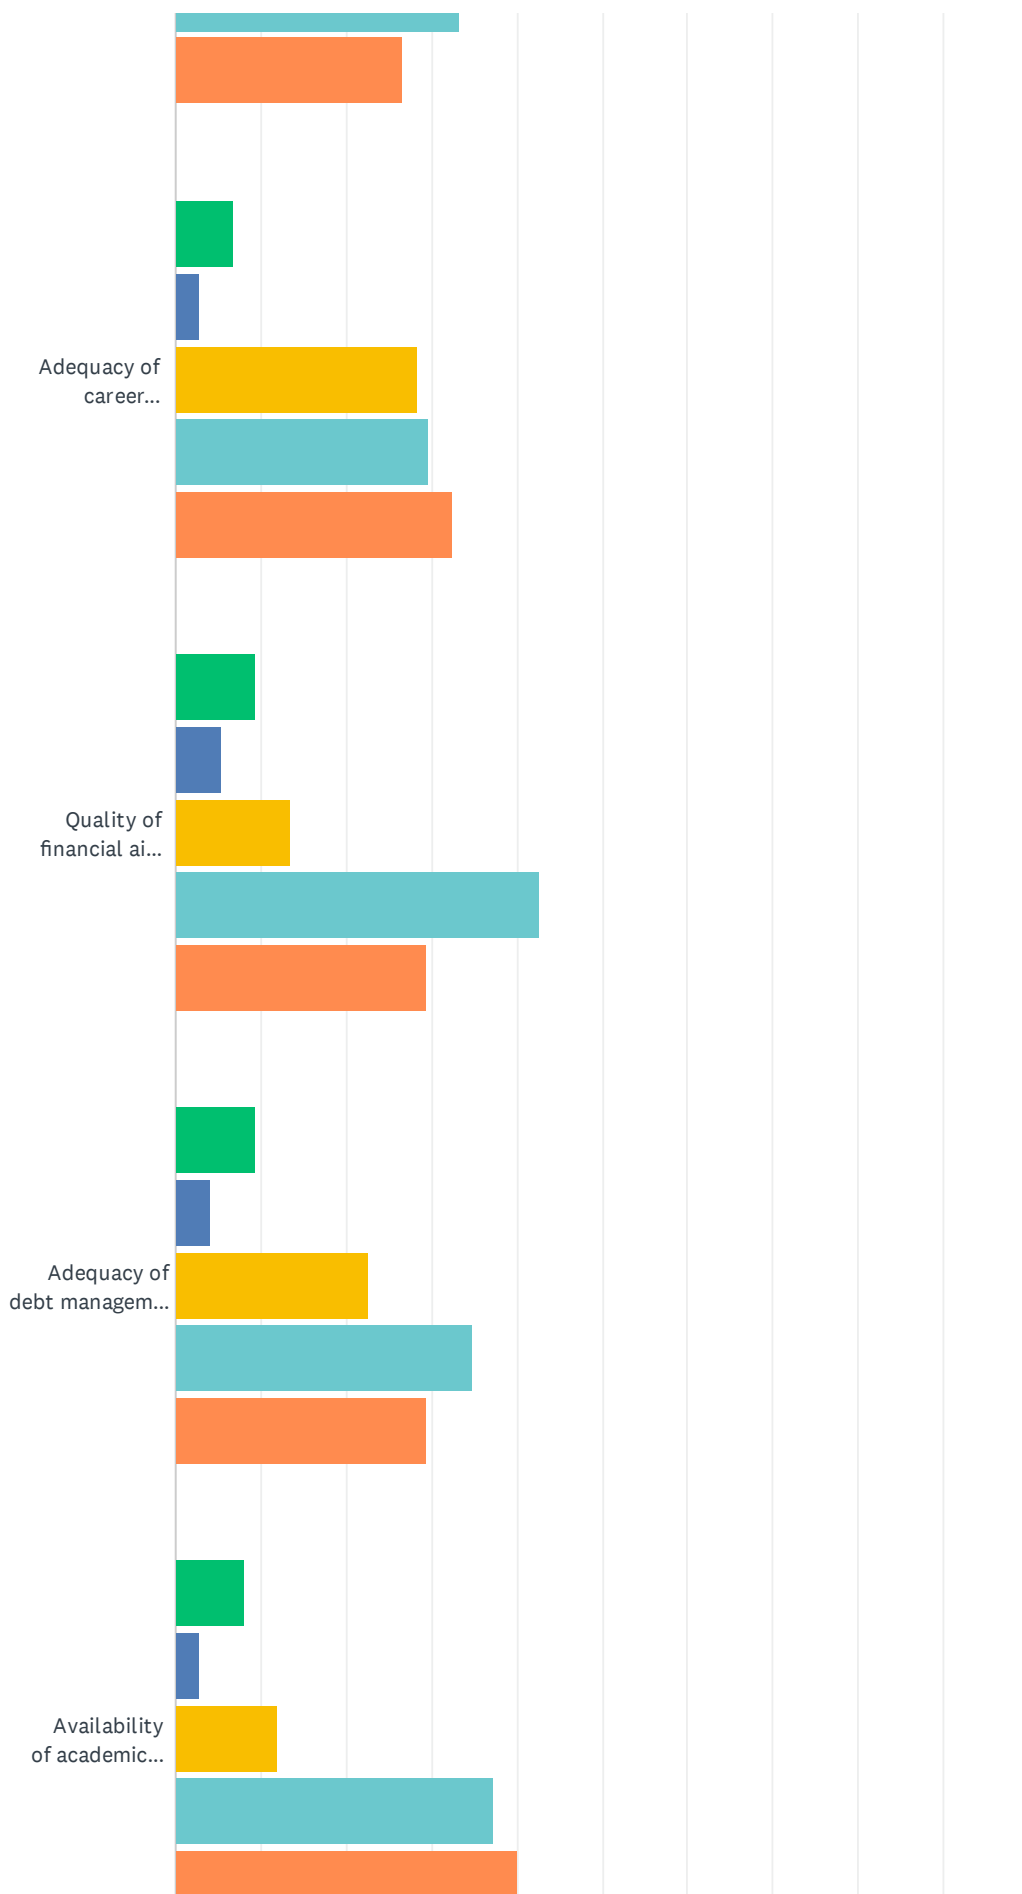

## Basic Science Program - Institutional Self Study Survey

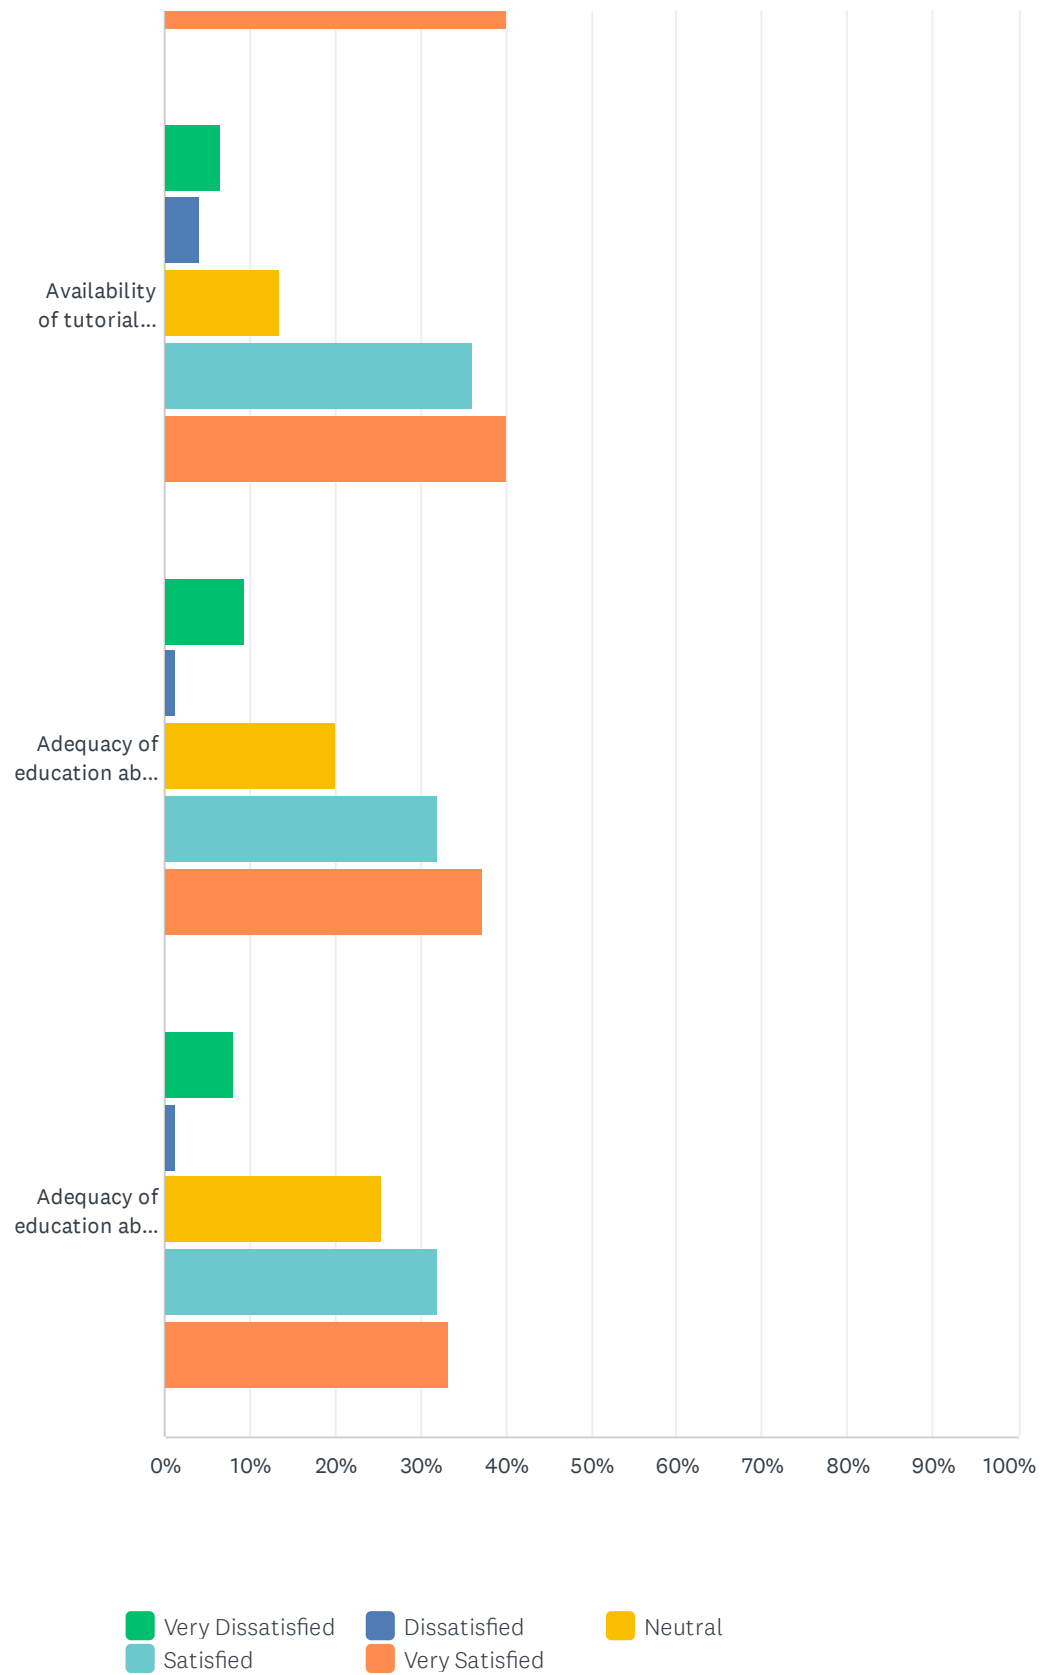

# Basic Science Program - Institutional Self Study Survey

|                                                                                                                      | VERY<br>DISSATISFIED | DISSATISFIED | NEUTRAL      | SATISFIED    | VERY<br>SATISFIED | TOTAL | WEIGHTED<br>AVERAGE |
|----------------------------------------------------------------------------------------------------------------------|----------------------|--------------|--------------|--------------|-------------------|-------|---------------------|
| Accessibility of student health services                                                                             | 8.00%<br>6           | 4.00%<br>3   | 22.67%<br>17 | 37.33%<br>28 | 28.00%<br>21      | 75    | 3.73                |
| Availability of mental health services                                                                               | 12.00%<br>9          | 1.33%<br>1   | 33.33%<br>25 | 24.00%<br>18 | 29.33%<br>22      | 75    | 3.57                |
| Confidentiality of mental health services                                                                            | 6.67%<br>5           | 4.00%<br>3   | 33.33%<br>25 | 20.00%<br>15 | 36.00%<br>27      | 75    | 3.75                |
| Availability of student well-being programmes                                                                        | 10.67%<br>8          | 2.67%<br>2   | 26.67%<br>20 | 33.33%<br>25 | 26.67%<br>20      | 75    | 3.63                |
| Adequacy of career counseling                                                                                        | 6.76%<br>5           | 2.70%<br>2   | 28.38%<br>21 | 29.73%<br>22 | 32.43%<br>24      | 74    | 3.78                |
| Quality of financial aid administrative services                                                                     | 9.33%<br>7           | 5.33%<br>4   | 13.33%<br>10 | 42.67%<br>32 | 29.33%<br>22      | 75    | 3.77                |
| Adequacy of debt management counselling                                                                              | 9.33%<br>7           | 4.00%<br>3   | 22.67%<br>17 | 34.67%<br>26 | 29.33%<br>22      | 75    | 3.71                |
| Availability of academic counselling                                                                                 | 8.00%<br>6           | 2.67%<br>2   | 12.00%<br>9  | 37.33%<br>28 | 40.00%<br>30      | 75    | 3.99                |
| Availability of tutorial help                                                                                        | 6.67%<br>5           | 4.00%<br>3   | 13.33%<br>10 | 36.00%<br>27 | 40.00%<br>30      | 75    | 3.99                |
| Adequacy of education about prevention and exposure to infectious and environmental hazards                          | 9.33%<br>7           | 1.33%<br>1   | 20.00%<br>15 | 32.00%<br>24 | 37.33%<br>28      | 75    | 3.87                |
| Adequacy of education about procedures for care and treatment after exposure to infectious and environmental hazards | 8.00%<br>6           | 1.33%<br>1   | 25.33%<br>19 | 32.00%<br>24 | 33.33%<br>25      | 75    | 3.81                |

## Q5 MEDICAL EDUCATION PROGRAMME

Answered: 75   Skipped: 1

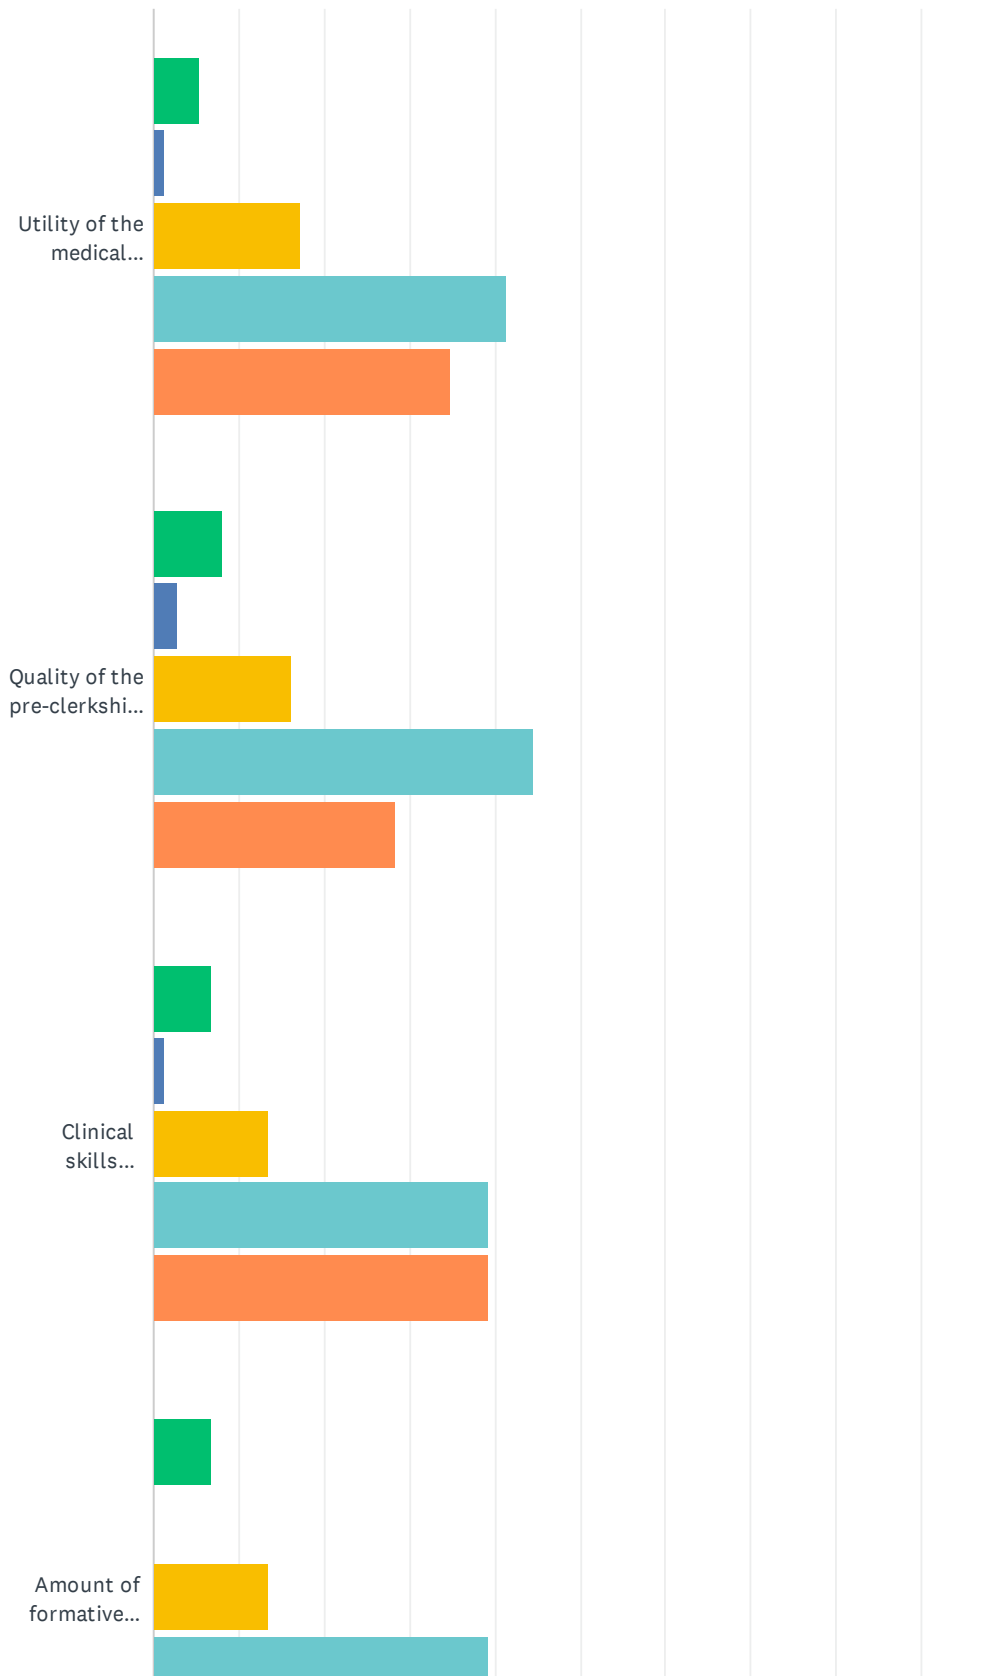

## Basic Science Program - Institutional Self Study Survey

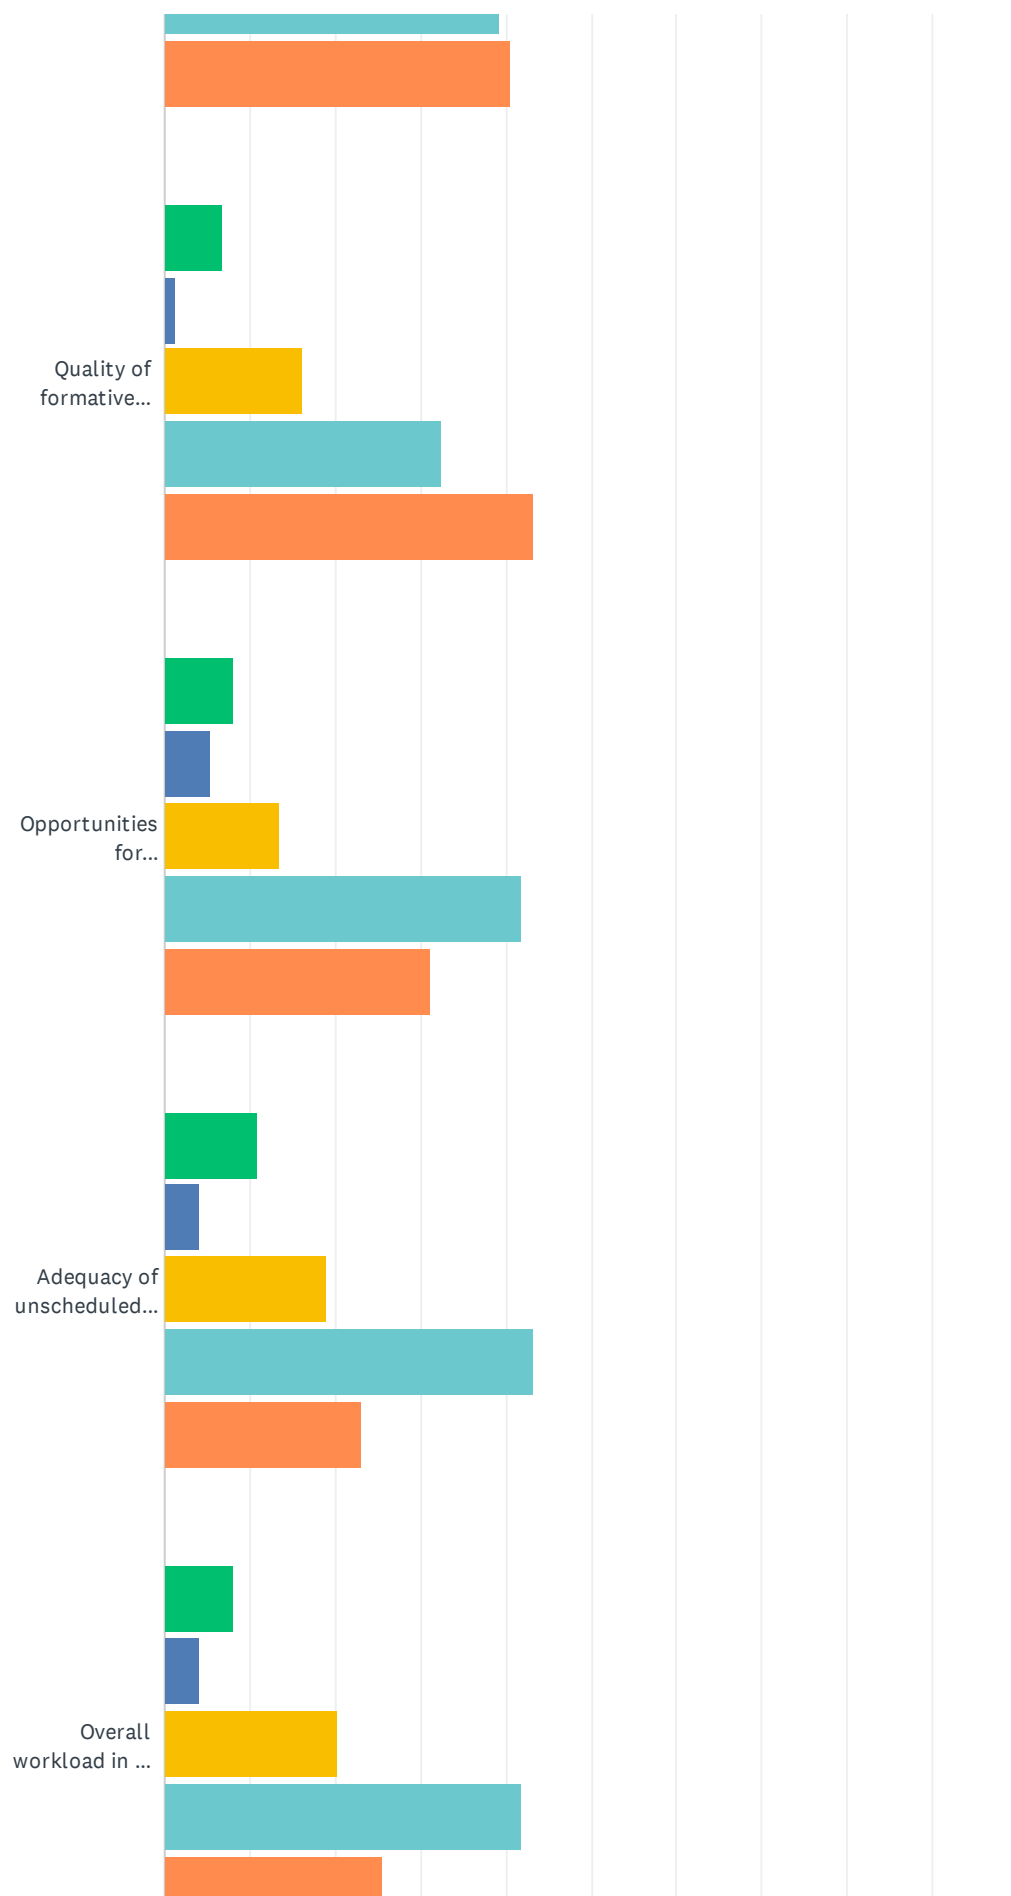

## Basic Science Program - Institutional Self Study Survey

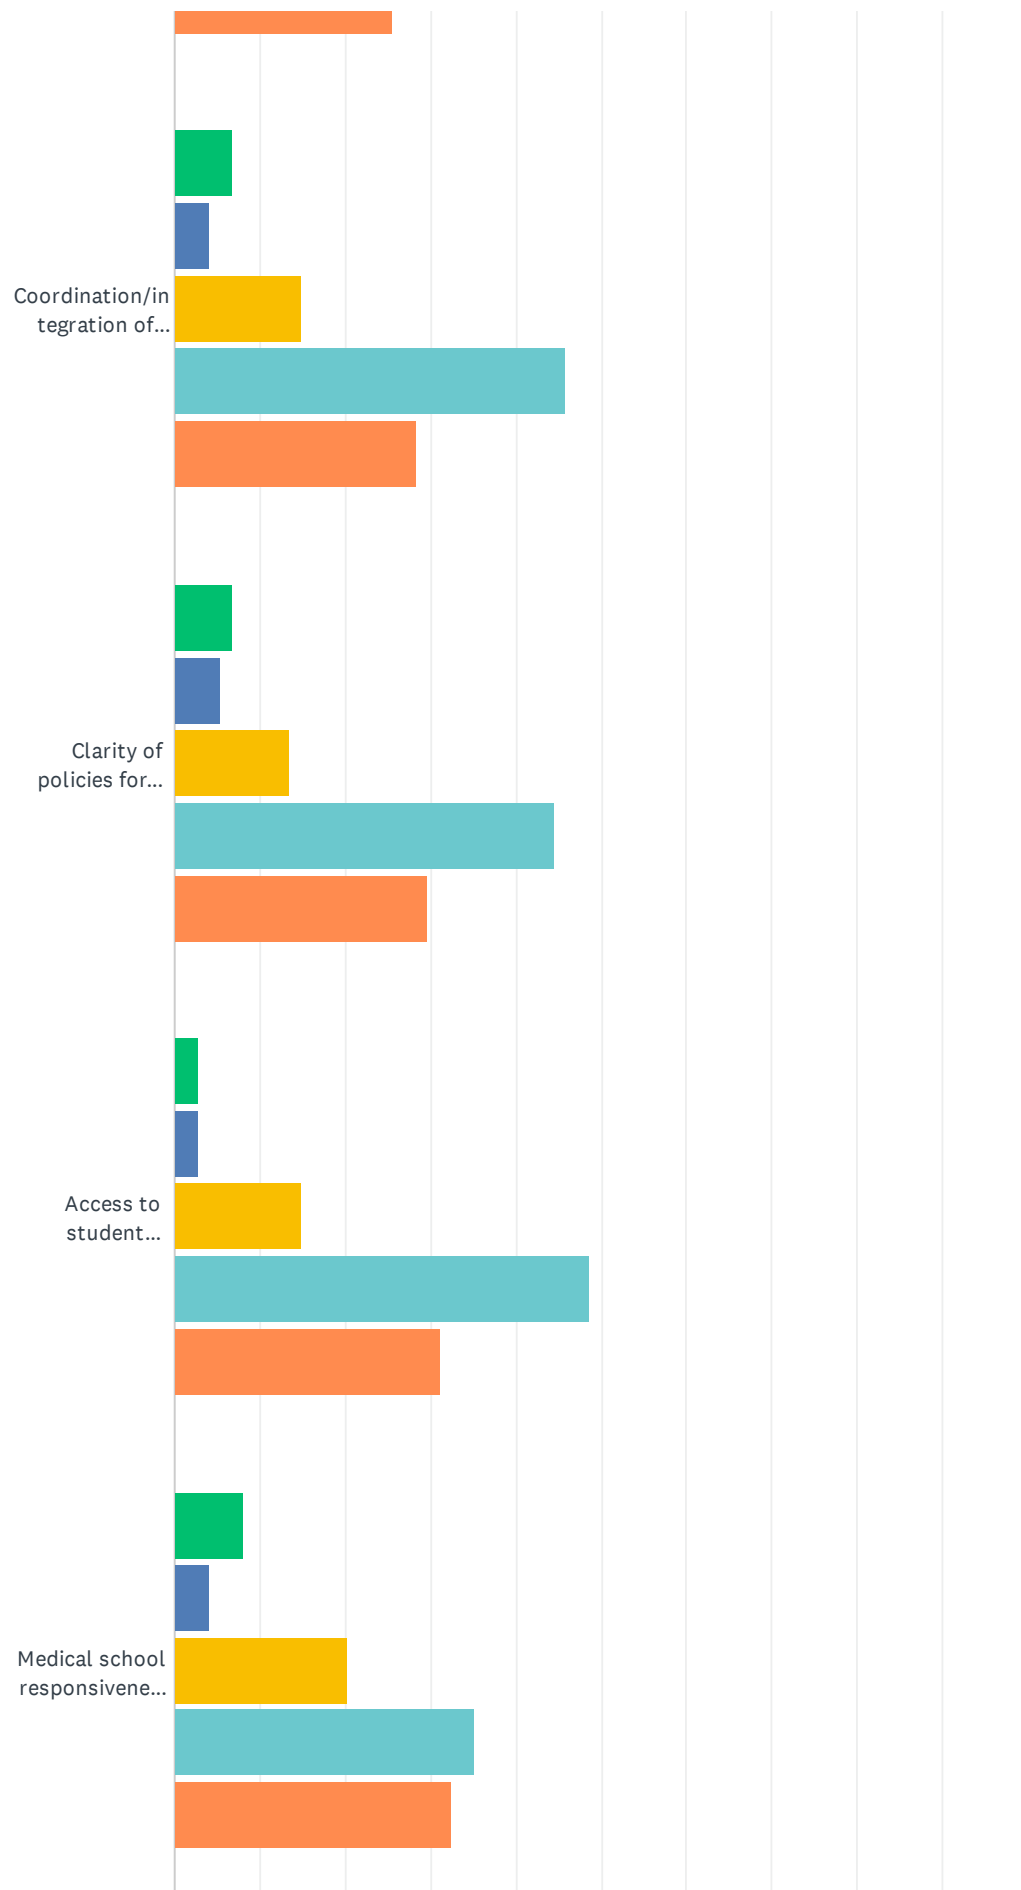



## Basic Science Program - Institutional Self Study Survey

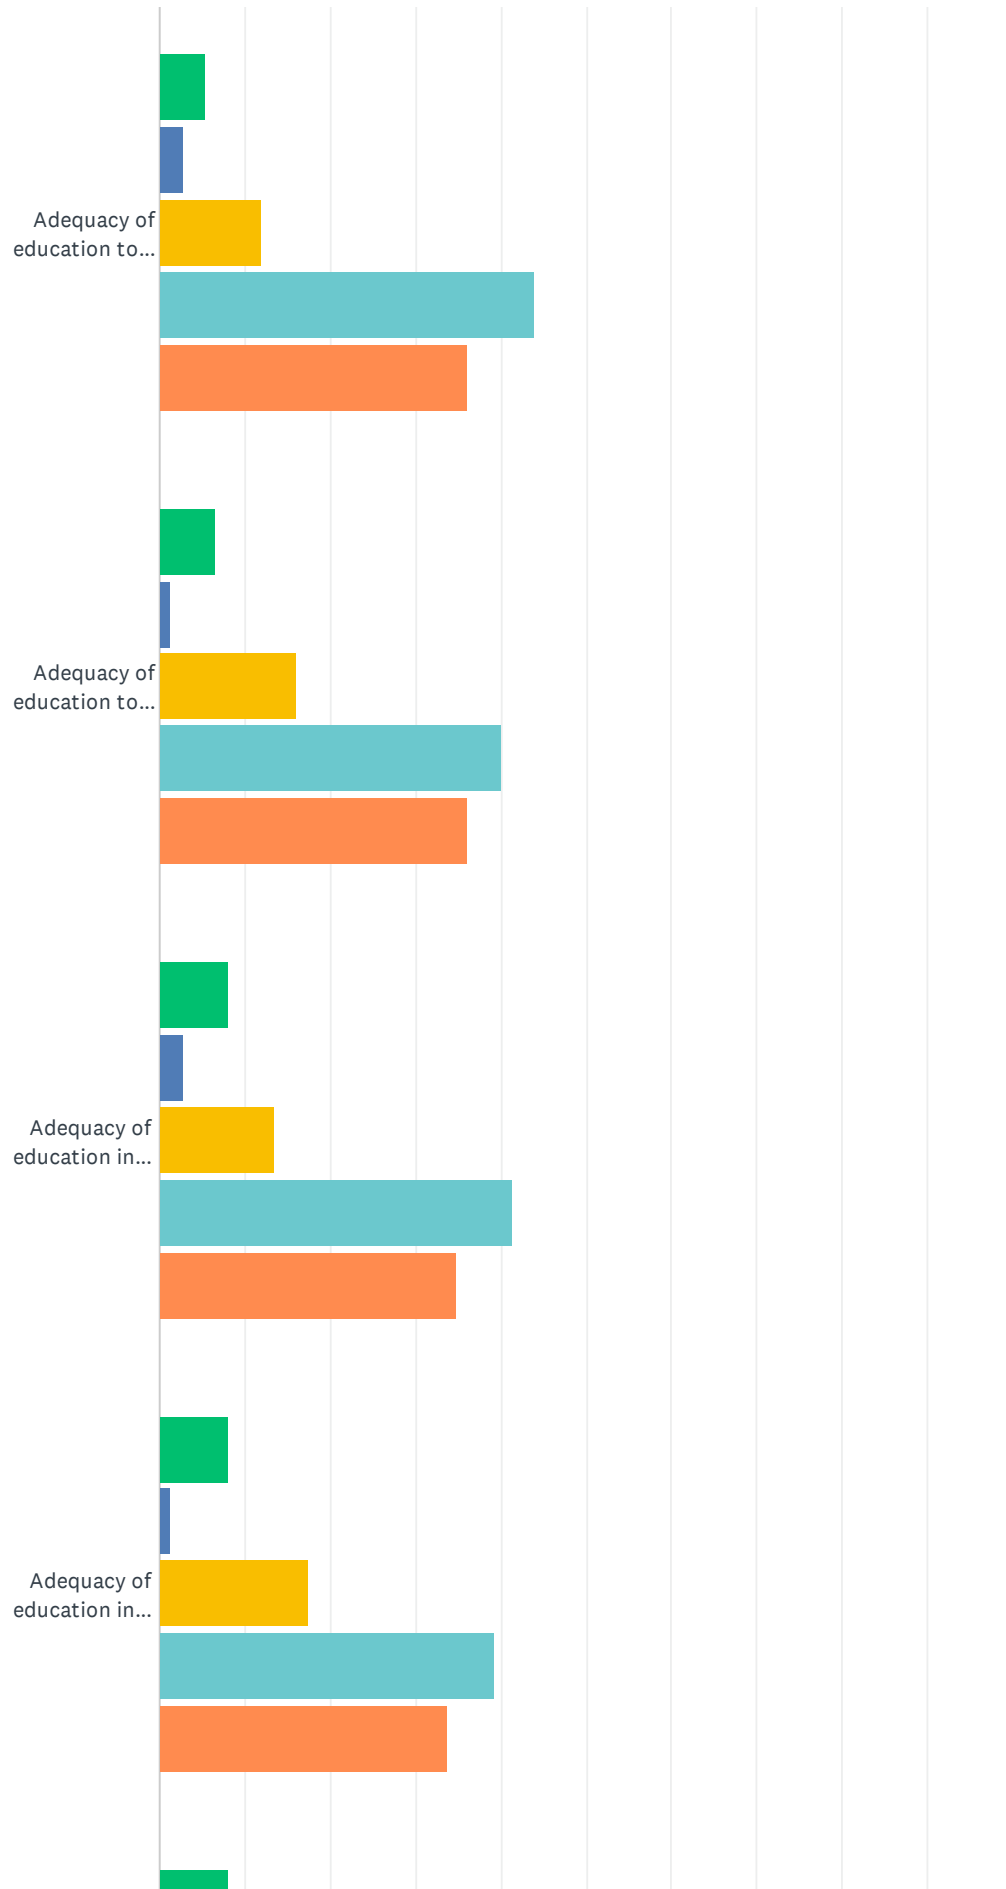

## Basic Science Program - Institutional Self Study Survey

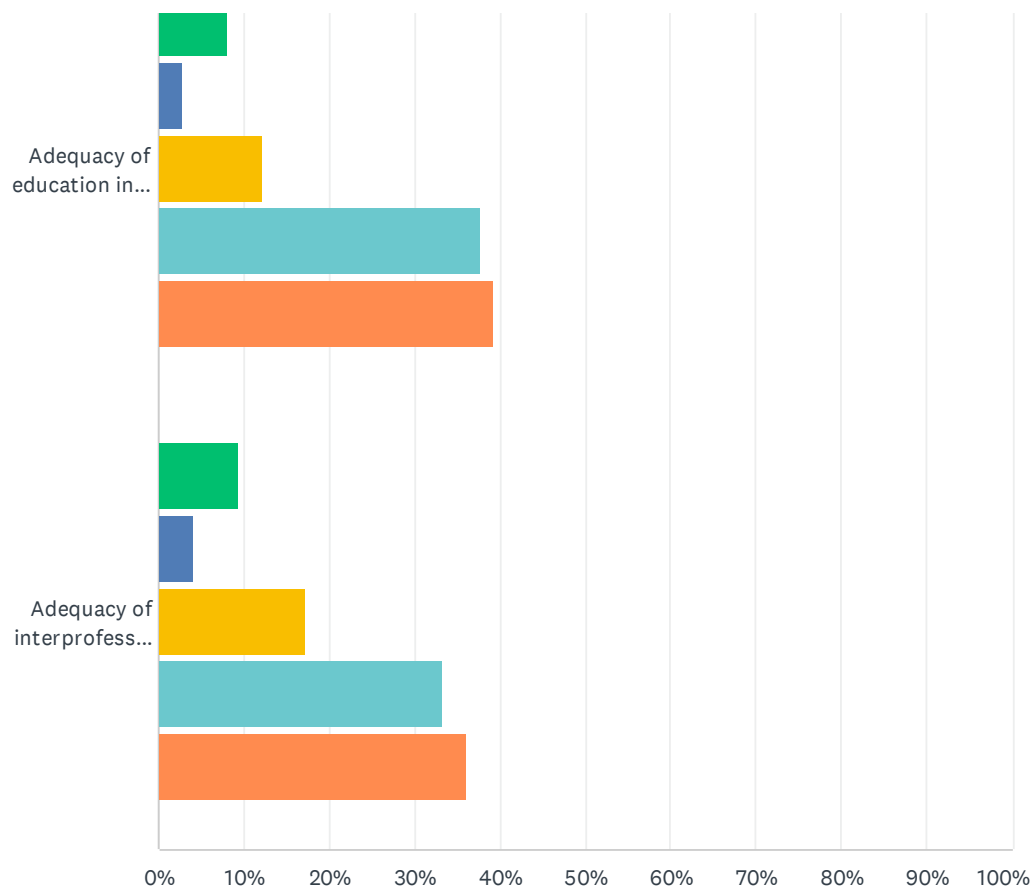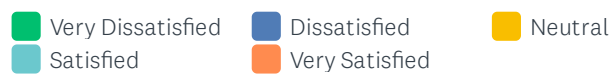

# Basic Science Program - Institutional Self Study Survey

|                                                                                    | VERY DISSATISFIED | DISSATISFIED | NEUTRAL      | SATISFIED    | VERY SATISFIED | TOTAL | WEIGHTED AVERAGE |
|------------------------------------------------------------------------------------|-------------------|--------------|--------------|--------------|----------------|-------|------------------|
| Utility of the medical education programme objectives to support learning          | 5.33%<br>4        | 1.33%<br>1   | 17.33%<br>13 | 41.33%<br>31 | 34.67%<br>26   | 75    | 3.99             |
| Quality of the pre-clerkship (first year/second year)                              | 8.11%<br>6        | 2.70%<br>2   | 16.22%<br>12 | 44.59%<br>33 | 28.38%<br>21   | 74    | 3.82             |
| Clinical skills instruction in the pre-clerkship (first/second year)               | 6.76%<br>5        | 1.35%<br>1   | 13.51%<br>10 | 39.19%<br>29 | 39.19%<br>29   | 74    | 4.03             |
| Amount of formative feedback in the pre-clerkship (first/second years)             | 6.76%<br>5        | 0.00%<br>0   | 13.51%<br>10 | 39.19%<br>29 | 40.54%<br>30   | 74    | 4.07             |
| Quality of formative feedback in the pre-clerkship (first/second years)            | 6.76%<br>5        | 1.35%<br>1   | 16.22%<br>12 | 32.43%<br>24 | 43.24%<br>32   | 74    | 4.04             |
| Opportunities for self-directed learning in the pre-clerkship (first/second years) | 8.11%<br>6        | 5.41%<br>4   | 13.51%<br>10 | 41.89%<br>31 | 31.08%<br>23   | 74    | 3.82             |
| Adequacy of unscheduled time for self-directed learning                            | 10.81%<br>8       | 4.05%<br>3   | 18.92%<br>14 | 43.24%<br>32 | 22.97%<br>17   | 74    | 3.64             |
| Overall workload in the pre-clerkship (first/second years)                         | 8.11%<br>6        | 4.05%<br>3   | 20.27%<br>15 | 41.89%<br>31 | 25.68%<br>19   | 74    | 3.73             |
| Coordination/integration of content in the pre clerkship (first/second years)      | 6.76%<br>5        | 4.05%<br>3   | 14.86%<br>11 | 45.95%<br>34 | 28.38%<br>21   | 74    | 3.85             |
| Clarity of policies for advancement/graduation                                     | 6.76%<br>5        | 5.41%<br>4   | 13.51%<br>10 | 44.59%<br>33 | 29.73%<br>22   | 74    | 3.85             |
| Access to student academic records                                                 | 2.70%<br>2        | 2.70%<br>2   | 14.86%<br>11 | 48.65%<br>36 | 31.08%<br>23   | 74    | 4.03             |
| Medical school responsiveness to student feedback on courses/clerkships            | 8.11%<br>6        | 4.05%<br>3   | 20.27%<br>15 | 35.14%<br>26 | 32.43%<br>24   | 74    | 3.80             |
| Adequacy of education to diagnose disease                                          | 5.33%<br>4        | 2.67%<br>2   | 12.00%<br>9  | 44.00%<br>33 | 36.00%<br>27   | 75    | 4.03             |
| Adequacy of education to manage disease                                            | 6.67%<br>5        | 1.33%<br>1   | 16.00%<br>12 | 40.00%<br>30 | 36.00%<br>27   | 75    | 3.97             |
| Adequacy of education in disease prevention                                        | 8.00%<br>6        | 2.67%<br>2   | 13.33%<br>10 | 41.33%<br>31 | 34.67%<br>26   | 75    | 3.92             |
| Adequacy of education in health maintenance                                        | 8.11%<br>6        | 1.35%<br>1   | 17.57%<br>13 | 39.19%<br>29 | 33.78%<br>25   | 74    | 3.89             |
| Adequacy of education in caring for patients from different backgrounds            | 8.11%<br>6        | 2.70%<br>2   | 12.16%<br>9  | 37.84%<br>28 | 39.19%<br>29   | 74    | 3.97             |
| Adequacy of                                                                        | 9.33%             | 4.00%        | 17.33%       | 33.33%       | 36.00%         |       |                  |

## Basic Science Program - Institutional Self Study Survey

|                                            |   |   |    |    |    |    |      |
|--------------------------------------------|---|---|----|----|----|----|------|
| interprofessional education<br>experiences | 7 | 3 | 13 | 25 | 27 | 75 | 3.83 |
|--------------------------------------------|---|---|----|----|----|----|------|

---

## Q1 Dean's Office

Answered: 114   Skipped: 2

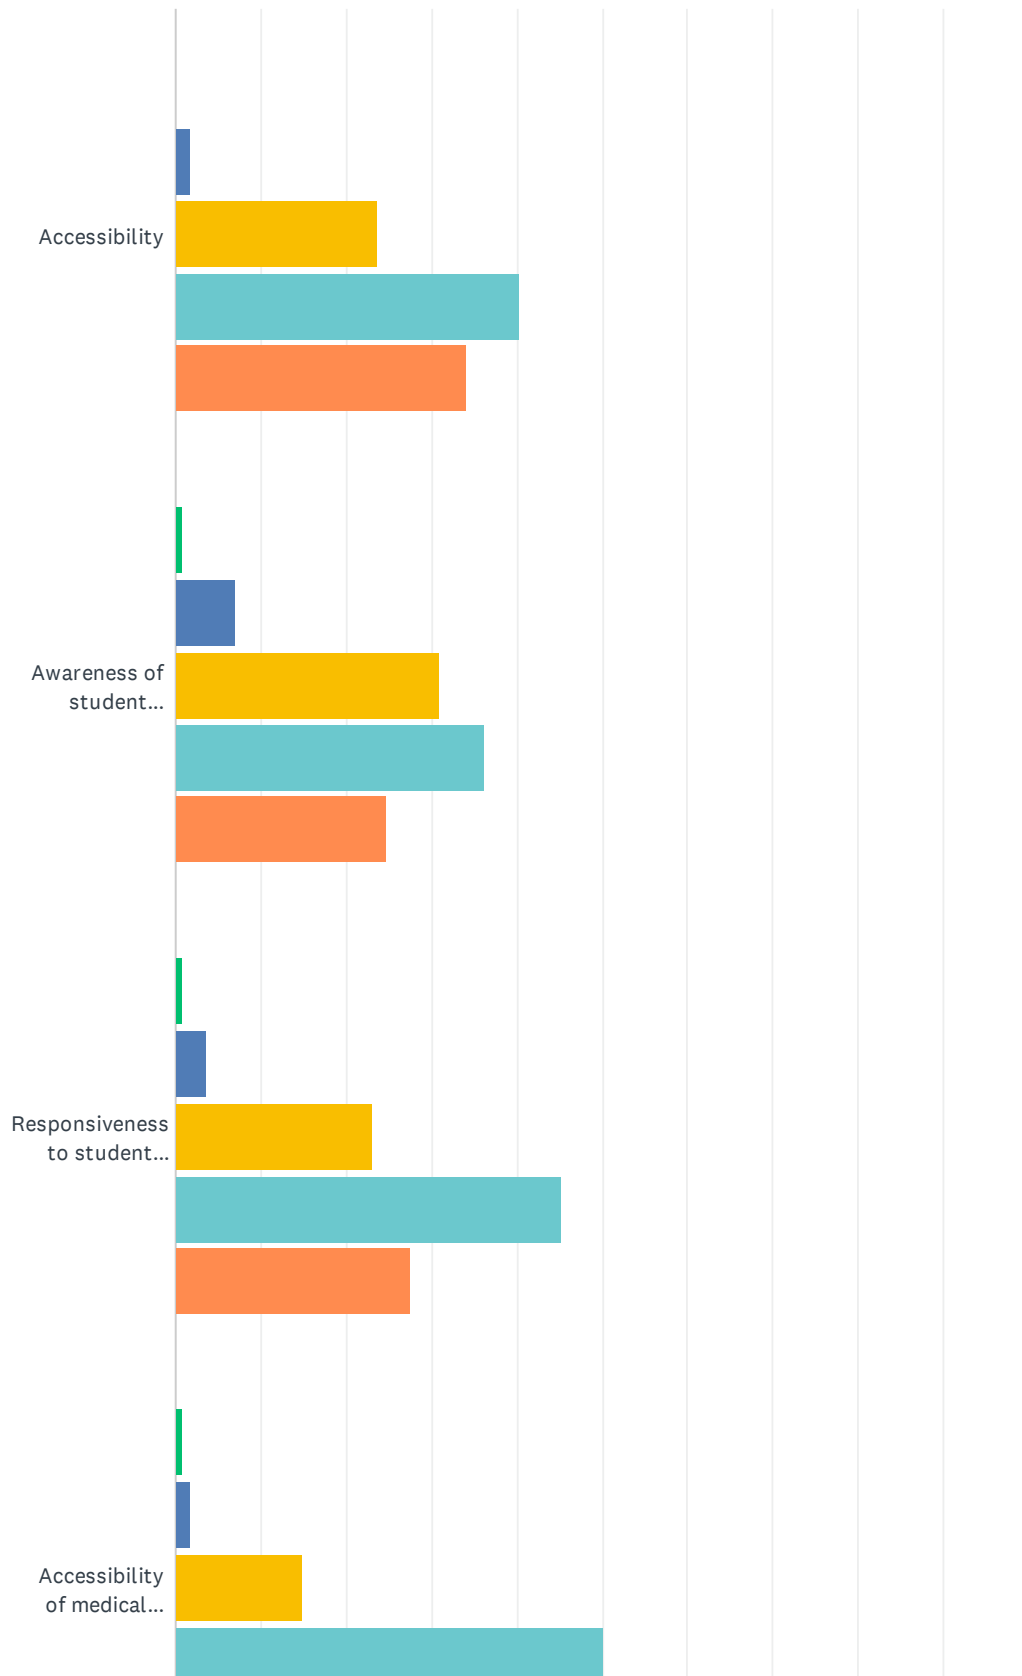

## Clinical Science Program - Institutional Self Study Survey

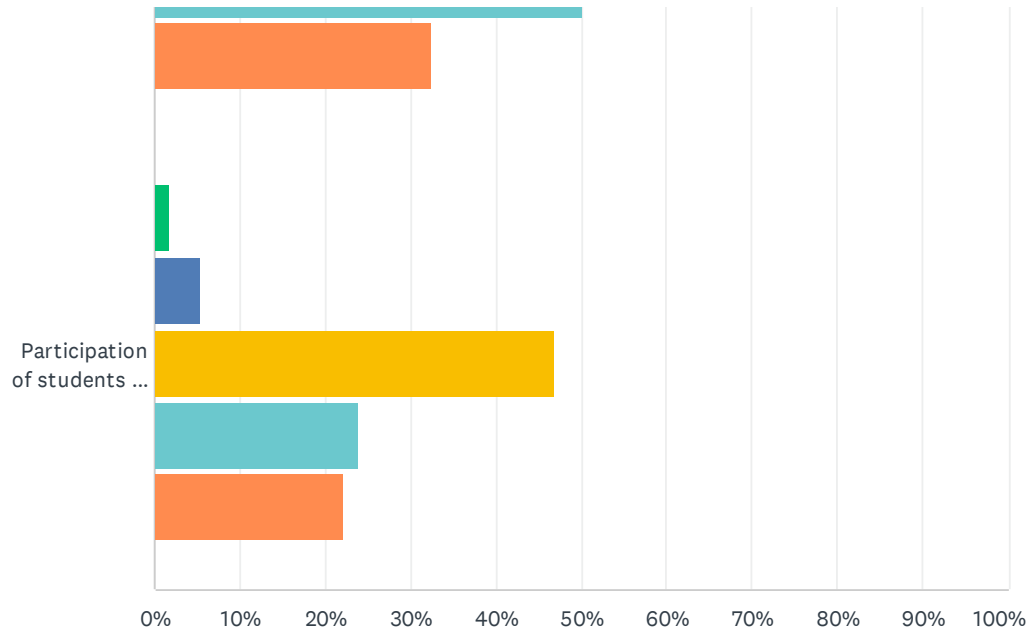

■ Very Dissatisfied
 ■ Dissatisfied
 ■ Neutral
 ■ Satisfied
 ■ Very Satisfied

|                                                            | VERY DISSATISFIED | DISSATISFIED | NEUTRAL      | SATISFIED    | VERY SATISFIED | TOTAL | WEIGHTED AVERAGE |
|------------------------------------------------------------|-------------------|--------------|--------------|--------------|----------------|-------|------------------|
| Accessibility                                              | 0.00%<br>0        | 1.75%<br>2   | 23.68%<br>27 | 40.35%<br>46 | 34.21%<br>39   | 114   | 4.07             |
| Awareness of student concerns                              | 0.88%<br>1        | 7.08%<br>8   | 30.97%<br>35 | 36.28%<br>41 | 24.78%<br>28   | 113   | 3.77             |
| Responsiveness to student problems                         | 0.88%<br>1        | 3.54%<br>4   | 23.01%<br>26 | 45.13%<br>51 | 27.43%<br>31   | 113   | 3.95             |
| Accessibility of medical school faculty                    | 0.88%<br>1        | 1.75%<br>2   | 14.91%<br>17 | 50.00%<br>57 | 32.46%<br>37   | 114   | 4.11             |
| Participation of students on key medical school committees | 1.77%<br>2        | 5.31%<br>6   | 46.90%<br>53 | 23.89%<br>27 | 22.12%<br>25   | 113   | 3.59             |

## Q2 LEARNING ENVIRONMENT AND FACILITIES

Answered: 116   Skipped: 0

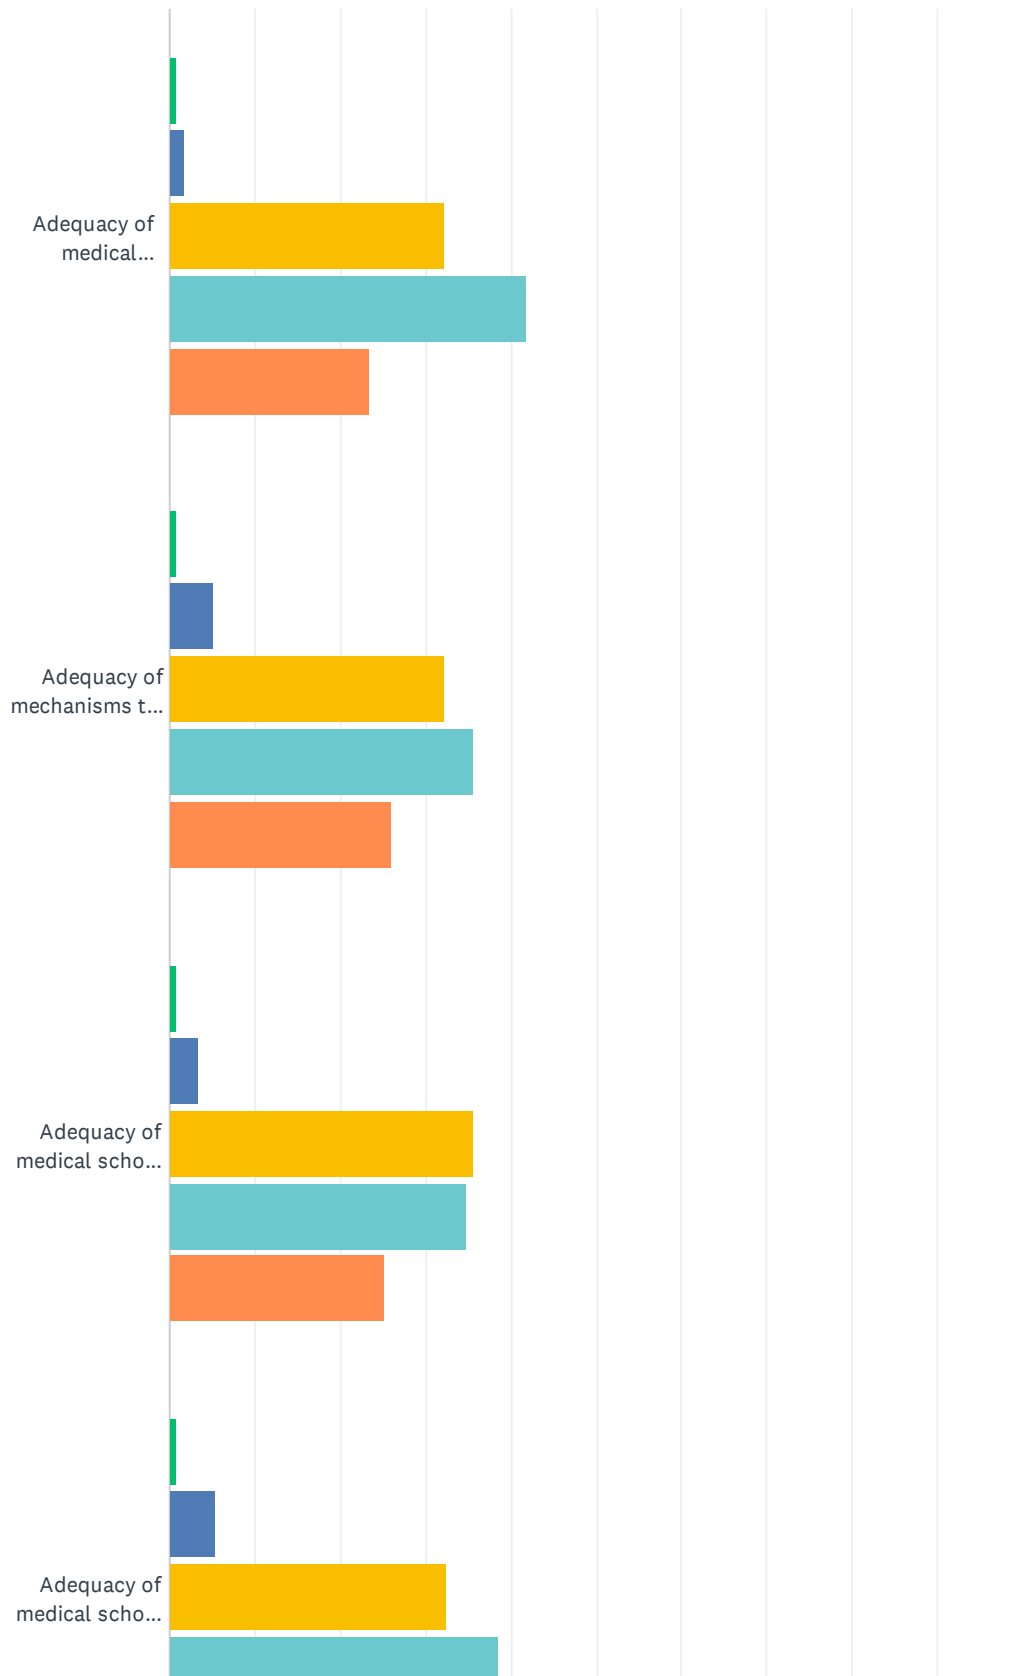

Clinical Science Program - Institutional Self Study Survey

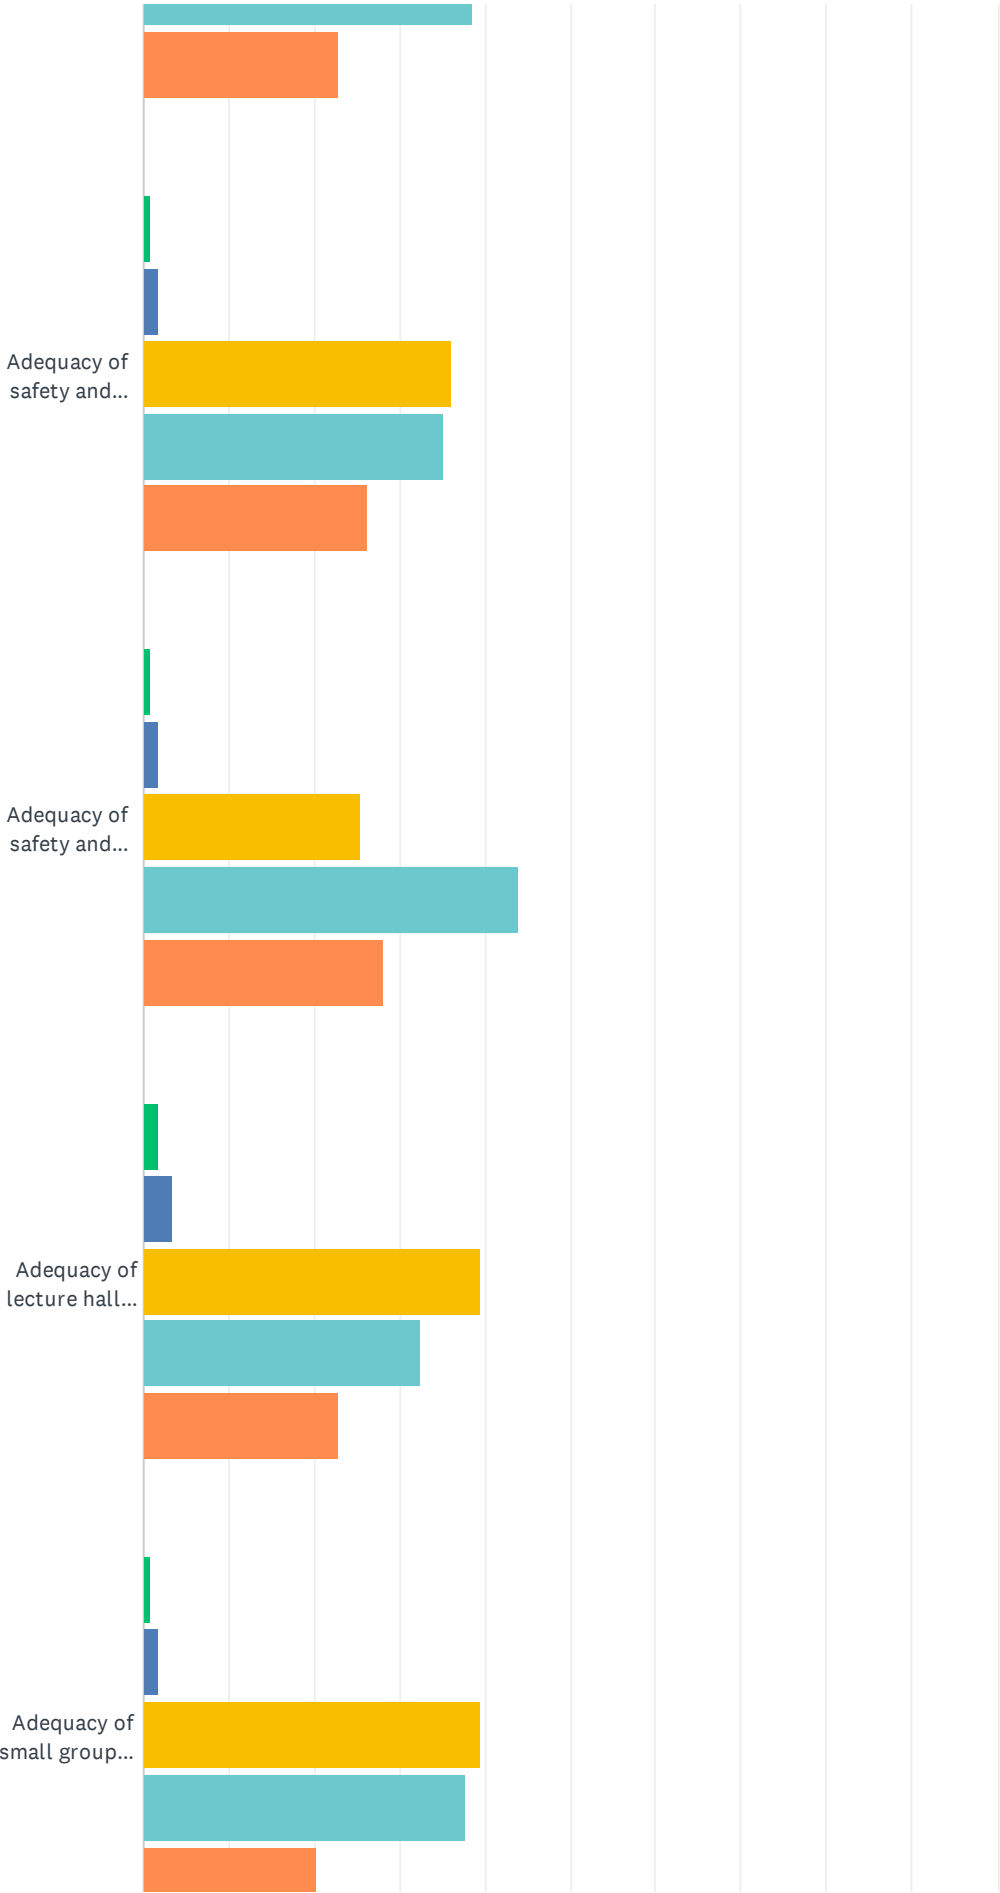



# Clinical Science Program - Institutional Self Study Survey

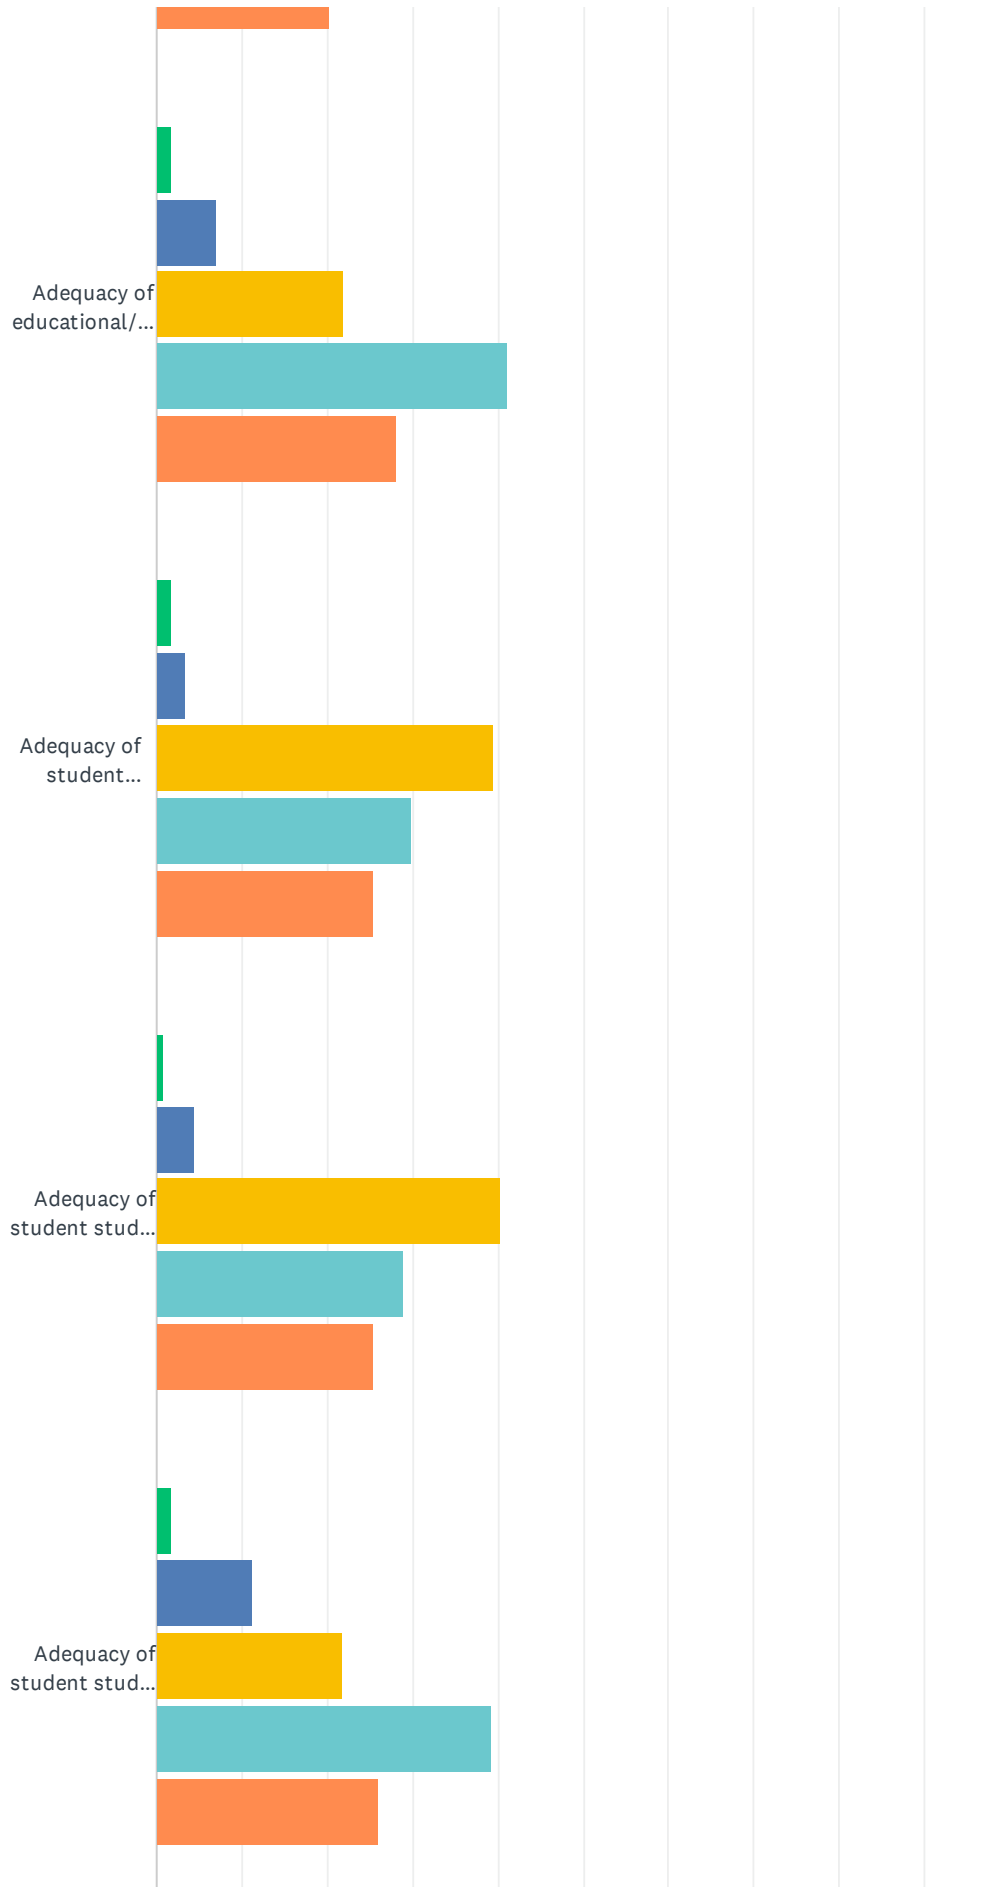

# Clinical Science Program - Institutional Self Study Survey

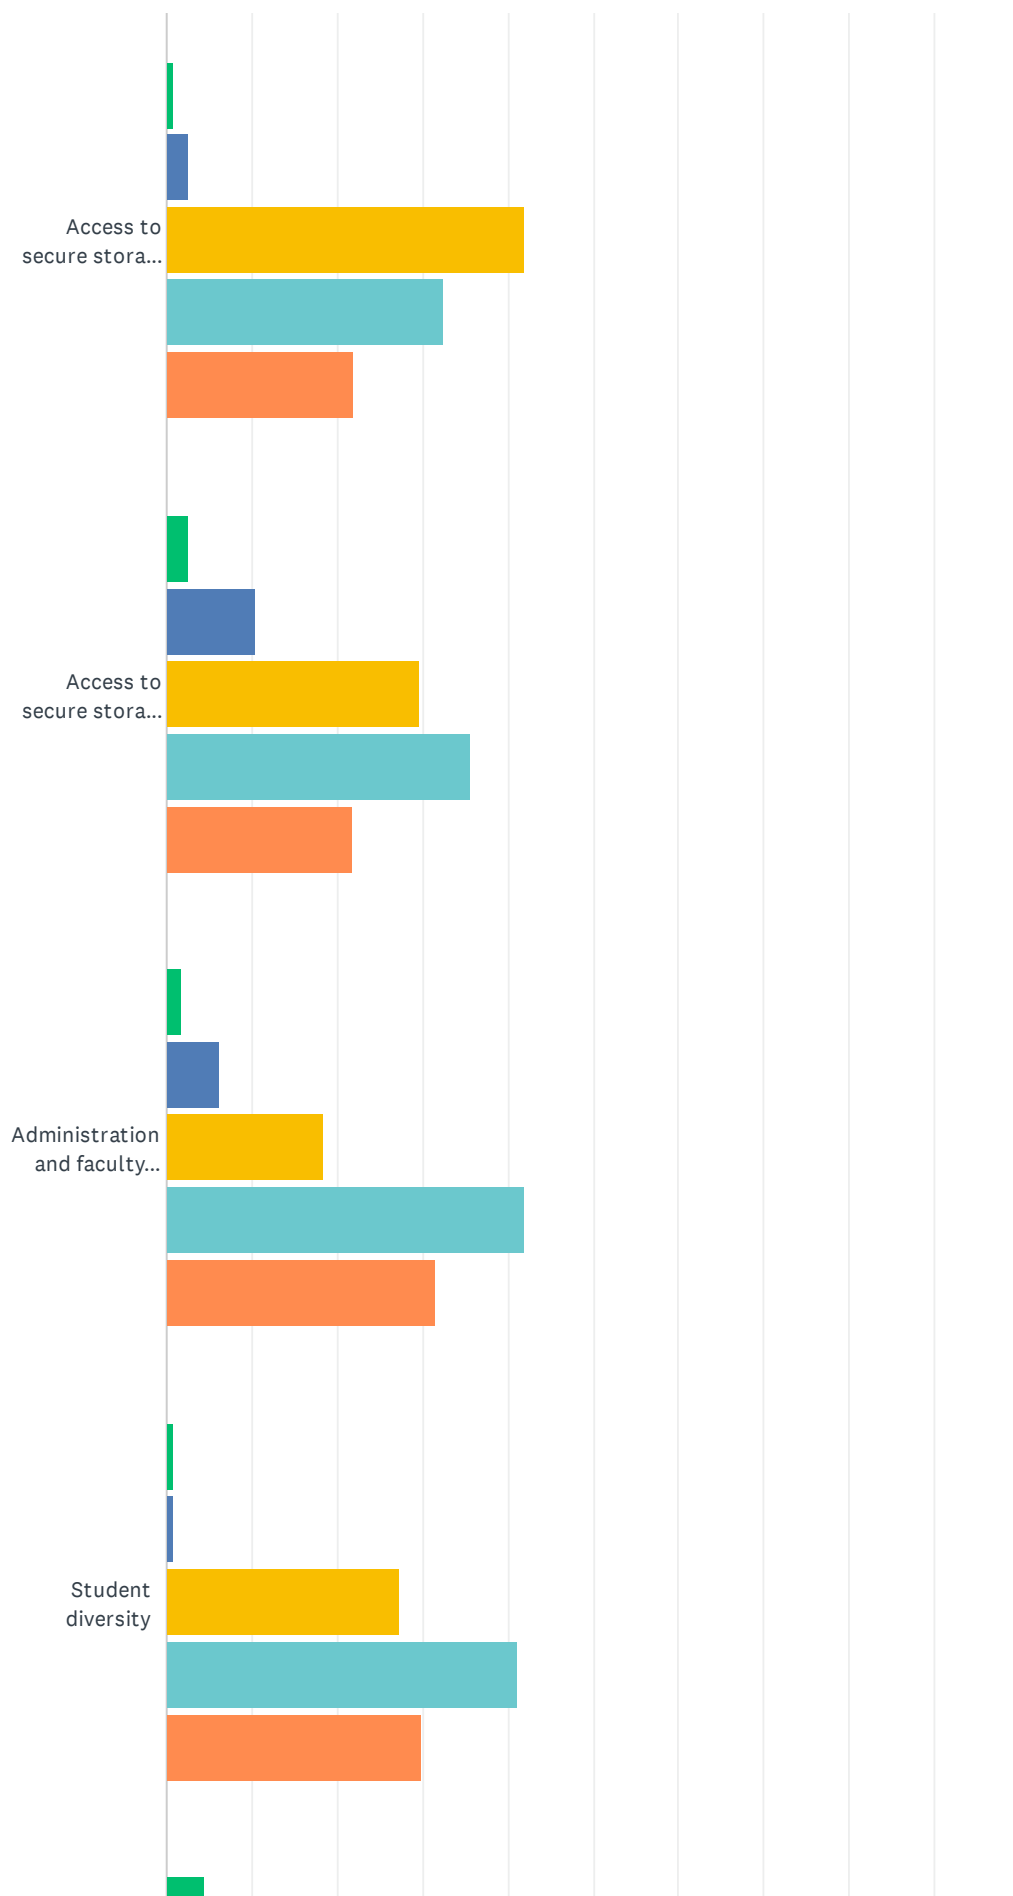

## Clinical Science Program - Institutional Self Study Survey

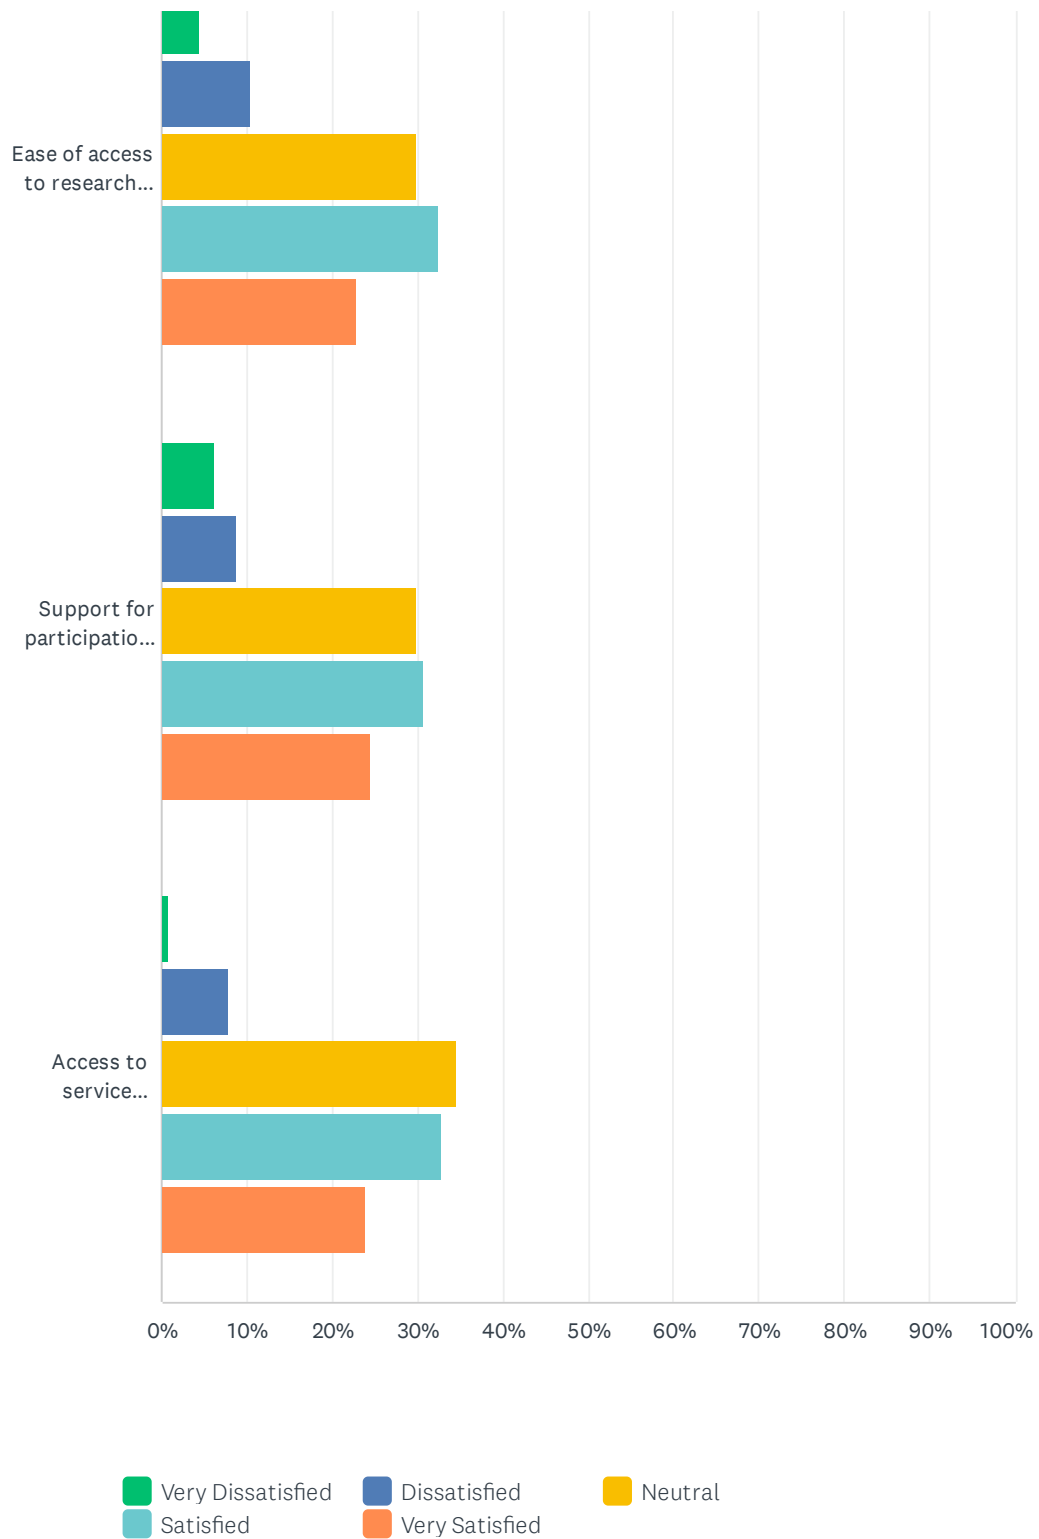

# Clinical Science Program - Institutional Self Study Survey

|                                                                                       | VERY DISSATISFIED | DISSATISFIED | NEUTRAL      | SATISFIED    | VERY SATISFIED | TOTAL | WEIGHTED AVERAGE |
|---------------------------------------------------------------------------------------|-------------------|--------------|--------------|--------------|----------------|-------|------------------|
| Adequacy of medical school's student mistreatment policy                              | 0.87%<br>1        | 1.74%<br>2   | 32.17%<br>37 | 41.74%<br>48 | 23.48%<br>27   | 115   | 3.85             |
| Adequacy of mechanisms to report mistreatment                                         | 0.87%<br>1        | 5.22%<br>6   | 32.17%<br>37 | 35.65%<br>41 | 26.09%<br>30   | 115   | 3.81             |
| Adequacy of medical school activities to prevent mistreatment                         | 0.87%<br>1        | 3.48%<br>4   | 35.65%<br>41 | 34.78%<br>40 | 25.22%<br>29   | 115   | 3.80             |
| Adequacy of medical school actions on reports of mistreatment                         | 0.88%<br>1        | 5.26%<br>6   | 32.46%<br>37 | 38.60%<br>44 | 22.81%<br>26   | 114   | 3.77             |
| Adequacy of safety and security at medical school campus                              | 0.88%<br>1        | 1.75%<br>2   | 35.96%<br>41 | 35.09%<br>40 | 26.32%<br>30   | 114   | 3.84             |
| Adequacy of safety and security at clinical sites                                     | 0.88%<br>1        | 1.75%<br>2   | 25.44%<br>29 | 43.86%<br>50 | 28.07%<br>32   | 114   | 3.96             |
| Adequacy of lecture halls, large group classroom facilities                           | 1.75%<br>2        | 3.51%<br>4   | 39.47%<br>45 | 32.46%<br>37 | 22.81%<br>26   | 114   | 3.71             |
| Adequacy of small group teaching spaces on campus                                     | 0.88%<br>1        | 1.75%<br>2   | 39.47%<br>45 | 37.72%<br>43 | 20.18%<br>23   | 114   | 3.75             |
| Adequacy of educational/teaching spaces at hospitals                                  | 1.75%<br>2        | 7.02%<br>8   | 21.93%<br>25 | 41.23%<br>47 | 28.07%<br>32   | 114   | 3.87             |
| Adequacy of student relaxation space at the medical school campus                     | 1.75%<br>2        | 3.51%<br>4   | 39.47%<br>45 | 29.82%<br>34 | 25.44%<br>29   | 114   | 3.74             |
| Adequacy of student study space at the medical school campus                          | 0.88%<br>1        | 4.39%<br>5   | 40.35%<br>46 | 28.95%<br>33 | 25.44%<br>29   | 114   | 3.74             |
| Adequacy of student study space at hospitals/clinical sites                           | 1.74%<br>2        | 11.30%<br>13 | 21.74%<br>25 | 39.13%<br>45 | 26.09%<br>30   | 115   | 3.77             |
| Access to secure storage space for personal belongings at the medical school campus   | 0.88%<br>1        | 2.63%<br>3   | 42.11%<br>48 | 32.46%<br>37 | 21.93%<br>25   | 114   | 3.72             |
| Access to secure storage space for personal belongings at the hospital/clinical sites | 2.61%<br>3        | 10.43%<br>12 | 29.57%<br>34 | 35.65%<br>41 | 21.74%<br>25   | 115   | 3.63             |
| Administration and faculty diversity                                                  | 1.75%<br>2        | 6.14%<br>7   | 18.42%<br>21 | 42.11%<br>48 | 31.58%<br>36   | 114   | 3.96             |
| Student diversity                                                                     | 0.88%<br>1        | 0.88%<br>1   | 27.19%<br>31 | 41.23%<br>47 | 29.82%<br>34   | 114   | 3.98             |
| Ease of access to research opportunities                                              | 4.39%<br>5        | 10.53%<br>12 | 29.82%<br>34 | 32.46%<br>37 | 22.81%<br>26   | 114   | 3.59             |
| Support for participation in research                                                 | 6.14%<br>7        | 8.77%<br>10  | 29.82%<br>34 | 30.70%<br>35 | 24.56%<br>28   | 114   | 3.59             |

## Clinical Science Program - Institutional Self Study Survey

|                                                                  |            |            |              |              |              |     |      |
|------------------------------------------------------------------|------------|------------|--------------|--------------|--------------|-----|------|
| Access to service<br>learning/community service<br>opportunities | 0.88%<br>1 | 7.96%<br>9 | 34.51%<br>39 | 32.74%<br>37 | 23.89%<br>27 | 113 | 3.71 |
|------------------------------------------------------------------|------------|------------|--------------|--------------|--------------|-----|------|

## Q3 LIBRARY AND INFORMATION RESOURCES

Answered: 114   Skipped: 2

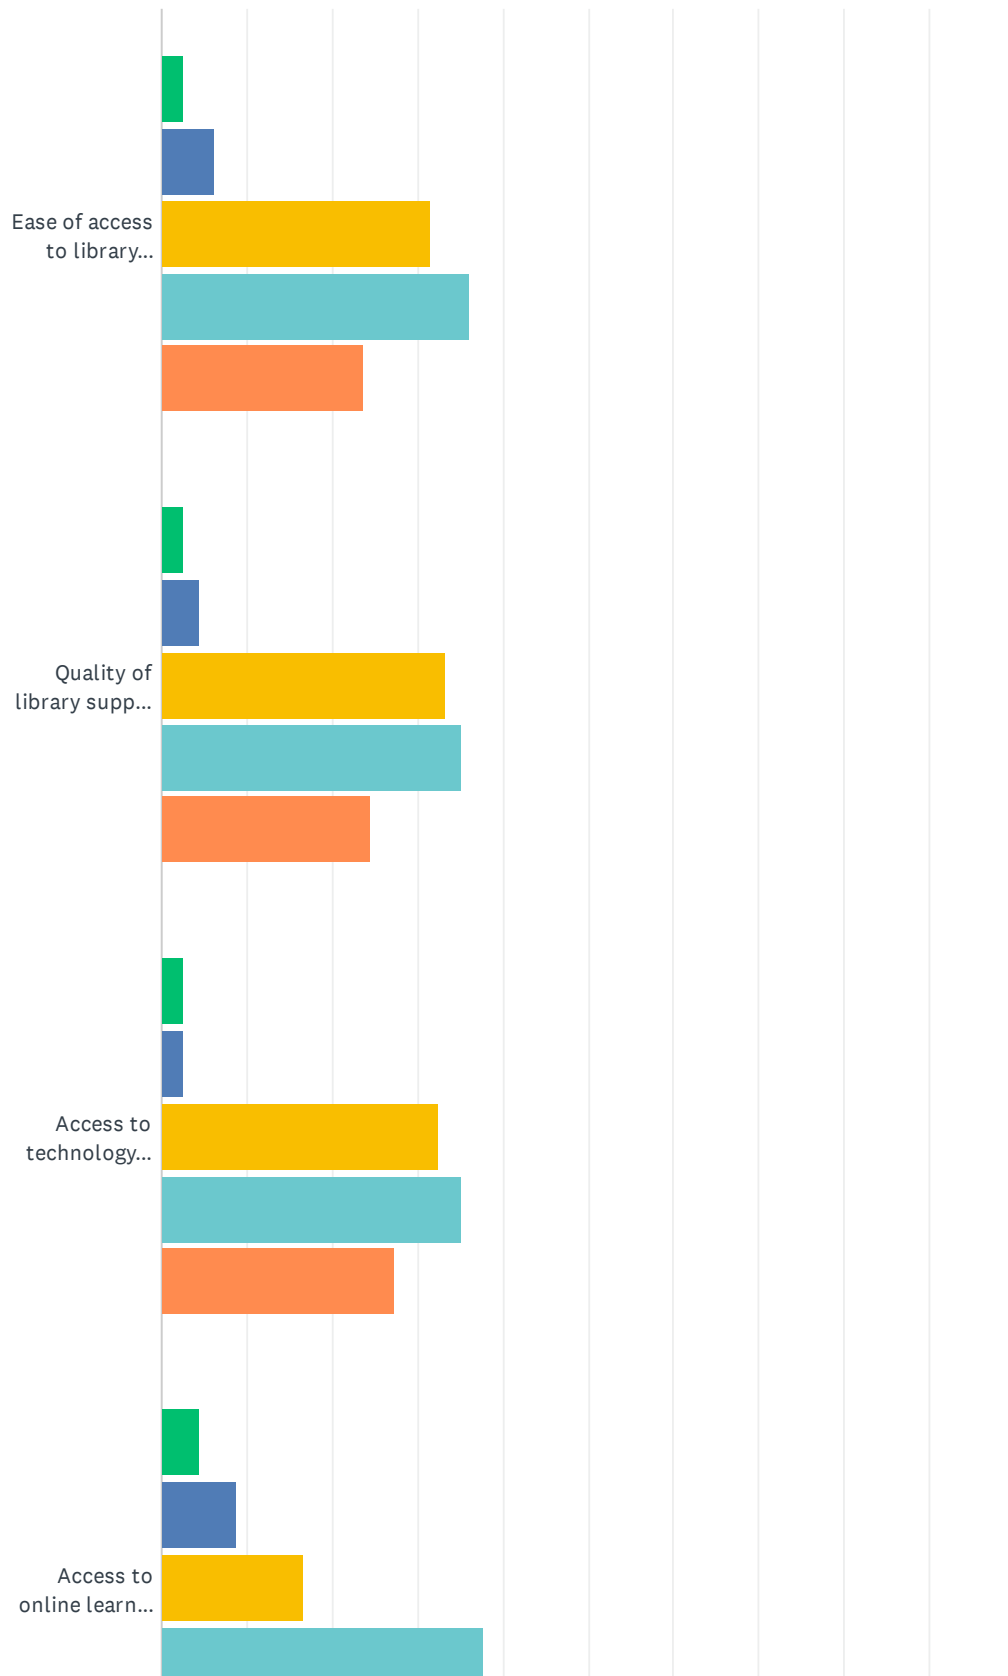

## Clinical Science Program - Institutional Self Study Survey

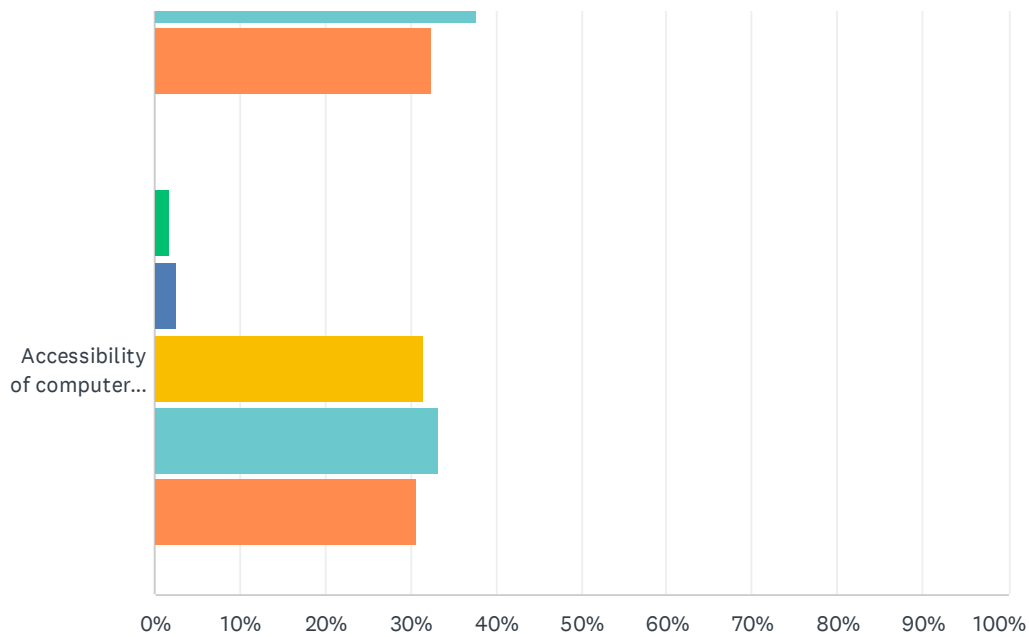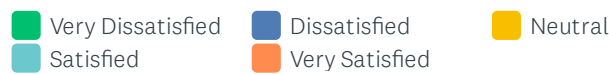

|                                                  | VERY DISSATISFIED | DISSATISFIED | NEUTRAL      | SATISFIED    | VERY SATISFIED | TOTAL | WEIGHTED AVERAGE |
|--------------------------------------------------|-------------------|--------------|--------------|--------------|----------------|-------|------------------|
| Ease of access to library resources and holdings | 2.63%<br>3        | 6.14%<br>7   | 31.58%<br>36 | 35.96%<br>41 | 23.68%<br>27   | 114   | 3.72             |
| Quality of library support and services          | 2.63%<br>3        | 4.39%<br>5   | 33.33%<br>38 | 35.09%<br>40 | 24.56%<br>28   | 114   | 3.75             |
| Access to technology support                     | 2.63%<br>3        | 2.63%<br>3   | 32.46%<br>37 | 35.09%<br>40 | 27.19%<br>31   | 114   | 3.82             |
| Access to online learning resources              | 4.39%<br>5        | 8.77%<br>10  | 16.67%<br>19 | 37.72%<br>43 | 32.46%<br>37   | 114   | 3.85             |
| Accessibility of computer support                | 1.75%<br>2        | 2.63%<br>3   | 31.58%<br>36 | 33.33%<br>38 | 30.70%<br>35   | 114   | 3.89             |

## Q4 STUDENT SERVICES

Answered: 115   Skipped: 1

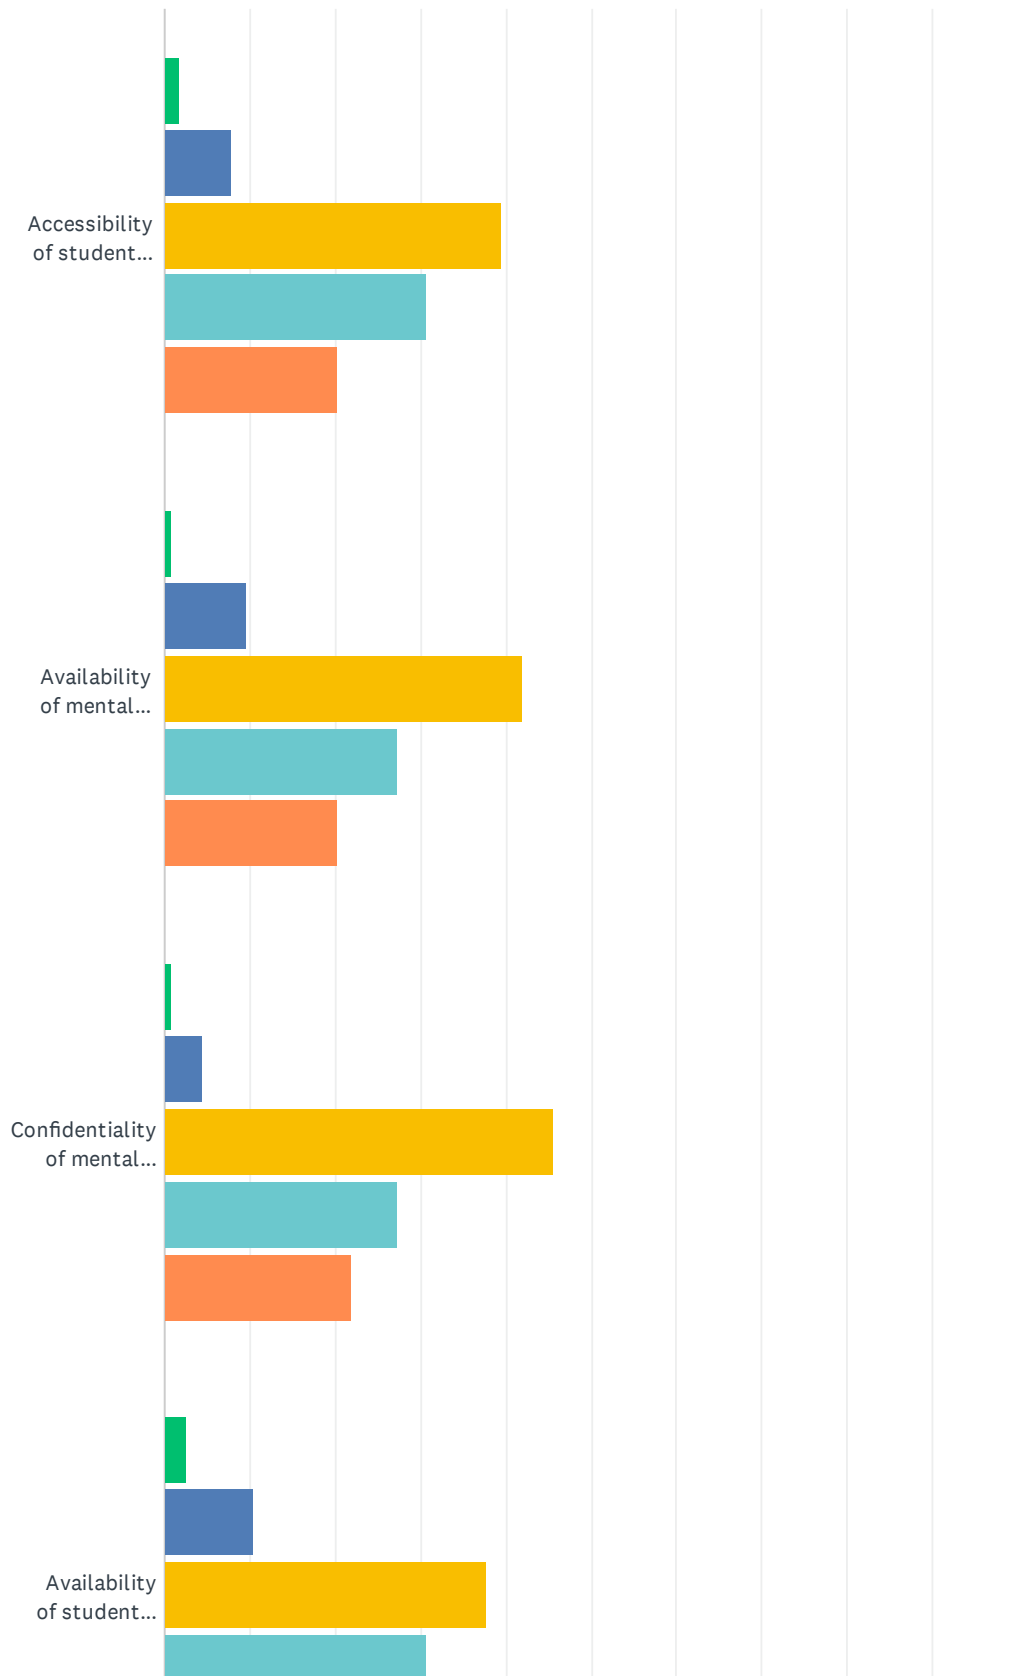



## Clinical Science Program - Institutional Self Study Survey

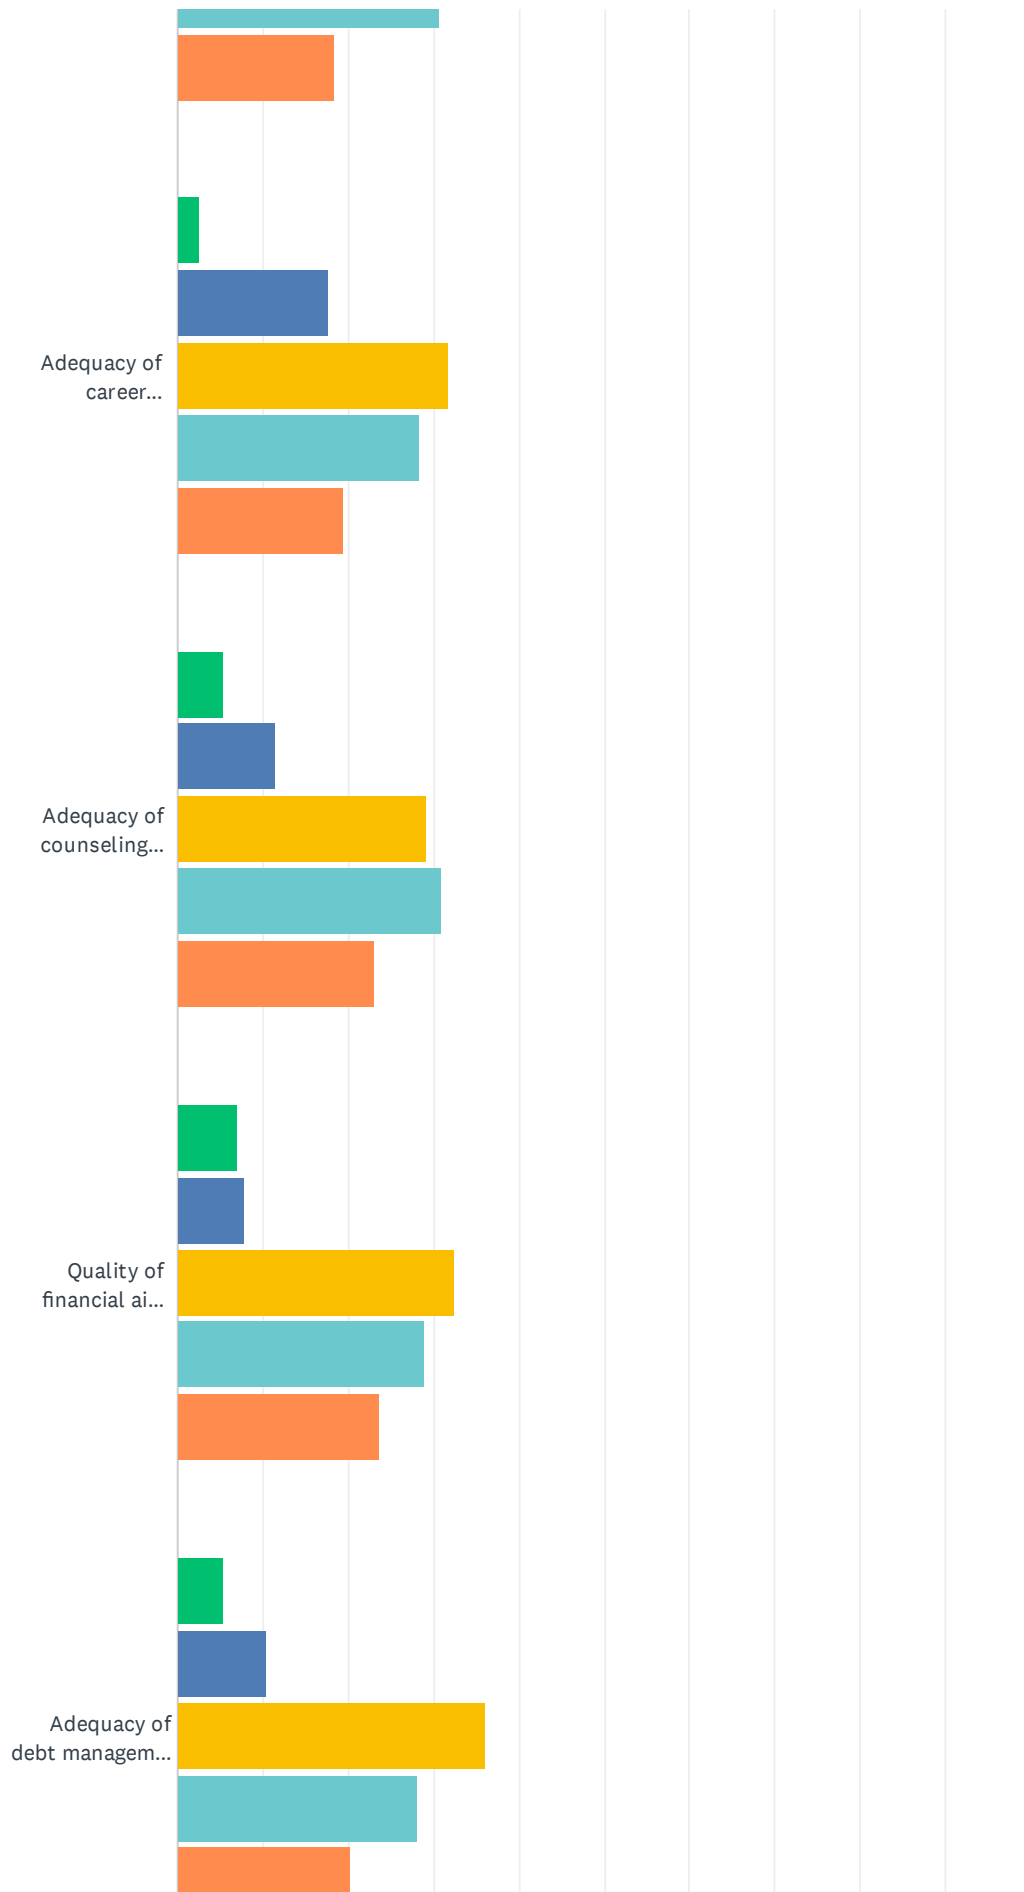

## Clinical Science Program - Institutional Self Study Survey

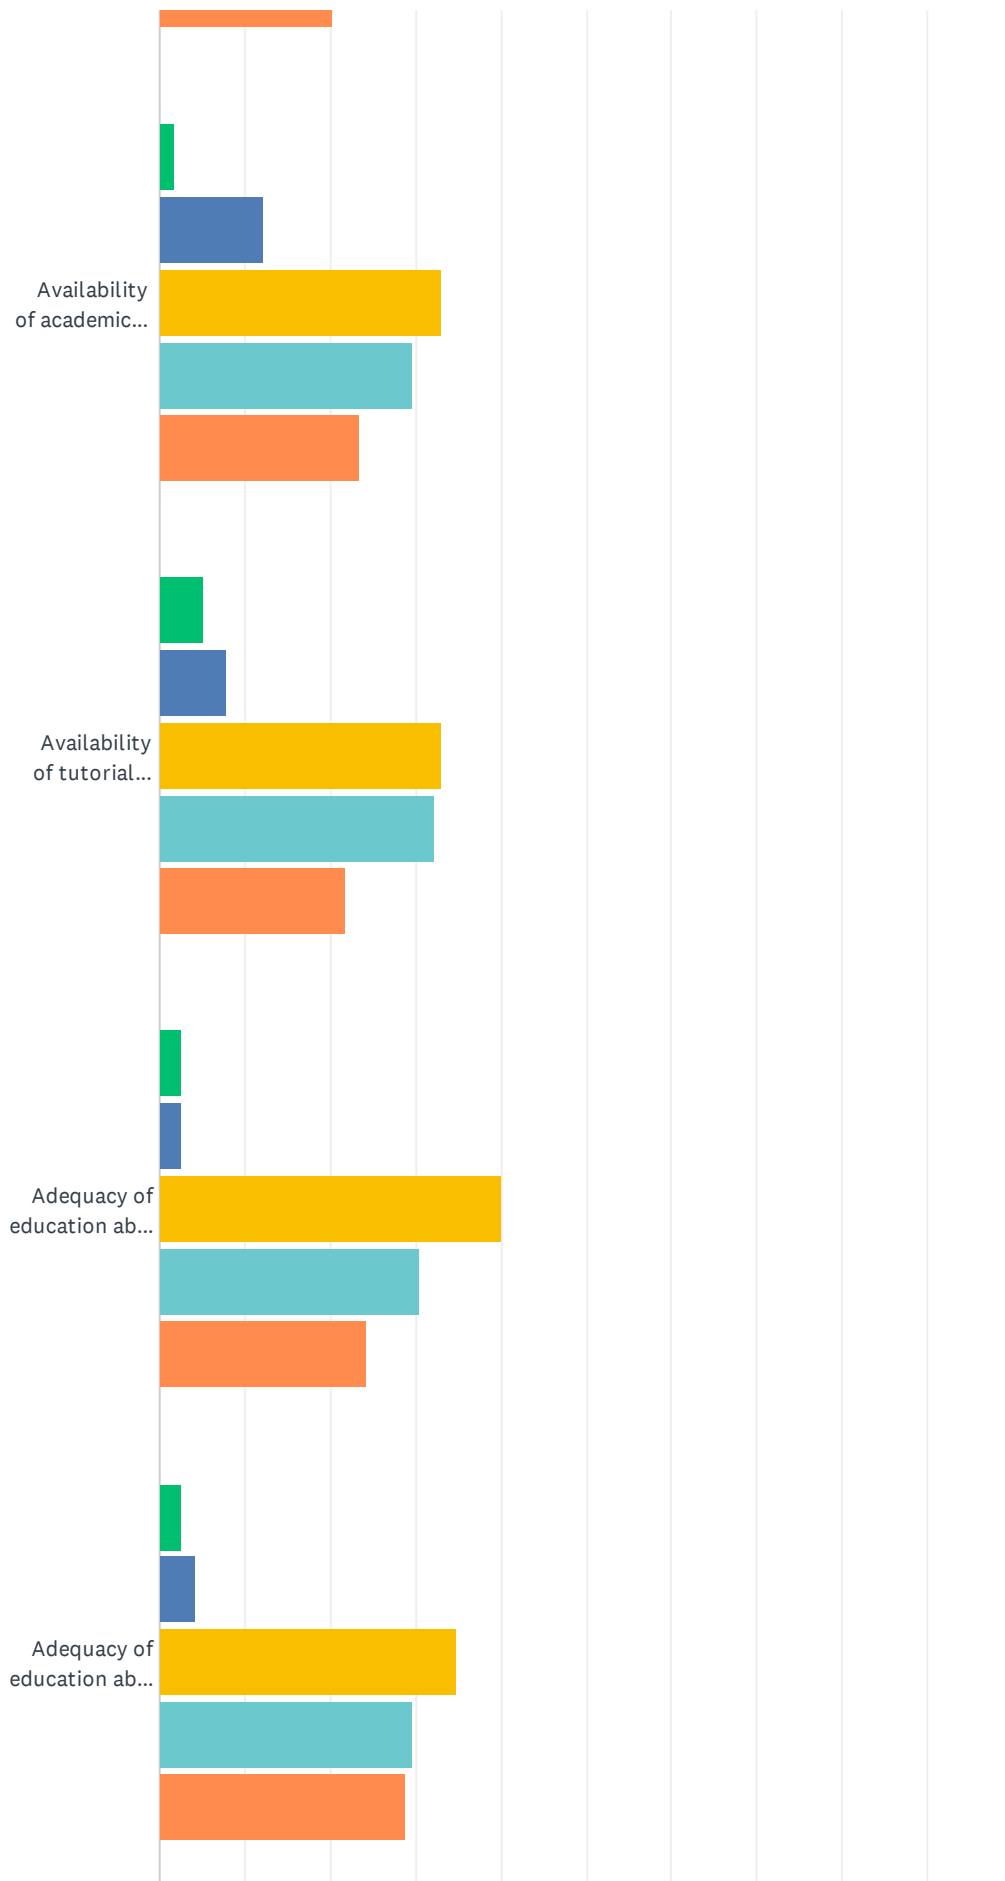

# Clinical Science Program - Institutional Self Study Survey

0% 10% 20% 30% 40% 50% 60% 70% 80% 90% 100%

 Very Dissatisfied
  Dissatisfied
  Neutral  
 Satisfied
  Very Satisfied

|                                                                                                                      | VERY DISSATISFIED | DISSATISFIED | NEUTRAL      | SATISFIED    | VERY SATISFIED | TOTAL | WEIGHTED AVERAGE |
|----------------------------------------------------------------------------------------------------------------------|-------------------|--------------|--------------|--------------|----------------|-------|------------------|
| Accessibility of student health services                                                                             | 1.75%<br>2        | 7.89%<br>9   | 39.47%<br>45 | 30.70%<br>35 | 20.18%<br>23   | 114   | 3.60             |
| Availability of mental health services                                                                               | 0.88%<br>1        | 9.65%<br>11  | 42.11%<br>48 | 27.19%<br>31 | 20.18%<br>23   | 114   | 3.56             |
| Confidentiality of mental health services                                                                            | 0.88%<br>1        | 4.39%<br>5   | 45.61%<br>52 | 27.19%<br>31 | 21.93%<br>25   | 114   | 3.65             |
| Availability of student well-being programmes                                                                        | 2.63%<br>3        | 10.53%<br>12 | 37.72%<br>43 | 30.70%<br>35 | 18.42%<br>21   | 114   | 3.52             |
| Adequacy of career counseling                                                                                        | 2.65%<br>3        | 17.70%<br>20 | 31.86%<br>36 | 28.32%<br>32 | 19.47%<br>22   | 113   | 3.44             |
| Adequacy of counseling about elective choices                                                                        | 5.31%<br>6        | 11.50%<br>13 | 29.20%<br>33 | 30.97%<br>35 | 23.01%<br>26   | 113   | 3.55             |
| Quality of financial aid administrative services                                                                     | 7.02%<br>8        | 7.89%<br>9   | 32.46%<br>37 | 28.95%<br>33 | 23.68%<br>27   | 114   | 3.54             |
| Adequacy of debt management counselling                                                                              | 5.26%<br>6        | 10.53%<br>12 | 35.96%<br>41 | 28.07%<br>32 | 20.18%<br>23   | 114   | 3.47             |
| Availability of academic counselling                                                                                 | 1.74%<br>2        | 12.17%<br>14 | 33.04%<br>38 | 29.57%<br>34 | 23.48%<br>27   | 115   | 3.61             |
| Availability of tutorial help                                                                                        | 5.22%<br>6        | 7.83%<br>9   | 33.04%<br>38 | 32.17%<br>37 | 21.74%<br>25   | 115   | 3.57             |
| Adequacy of education about prevention and exposure to infectious and environmental hazards                          | 2.61%<br>3        | 2.61%<br>3   | 40.00%<br>46 | 30.43%<br>35 | 24.35%<br>28   | 115   | 3.71             |
| Adequacy of education about procedures for care and treatment after exposure to infectious and environmental hazards | 2.61%<br>3        | 4.35%<br>5   | 34.78%<br>40 | 29.57%<br>34 | 28.70%<br>33   | 115   | 3.77             |

## Q5 MEDICAL EDUCATION PROGRAMME

Answered: 115   Skipped: 1

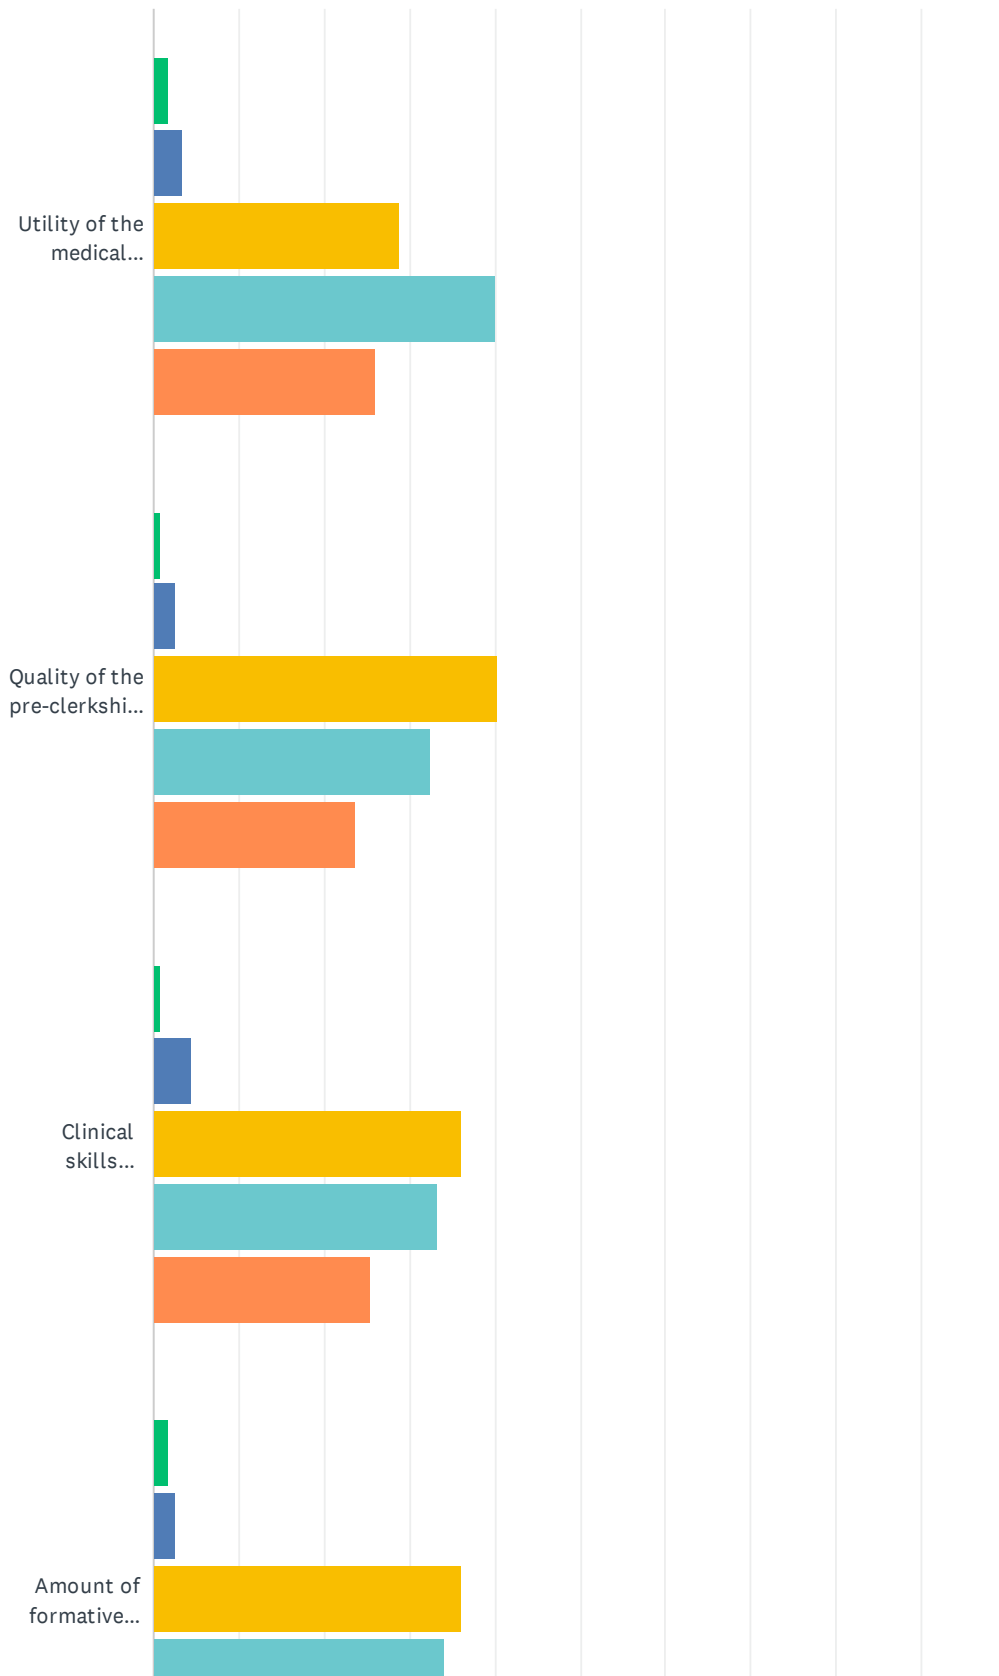

## Clinical Science Program - Institutional Self Study Survey

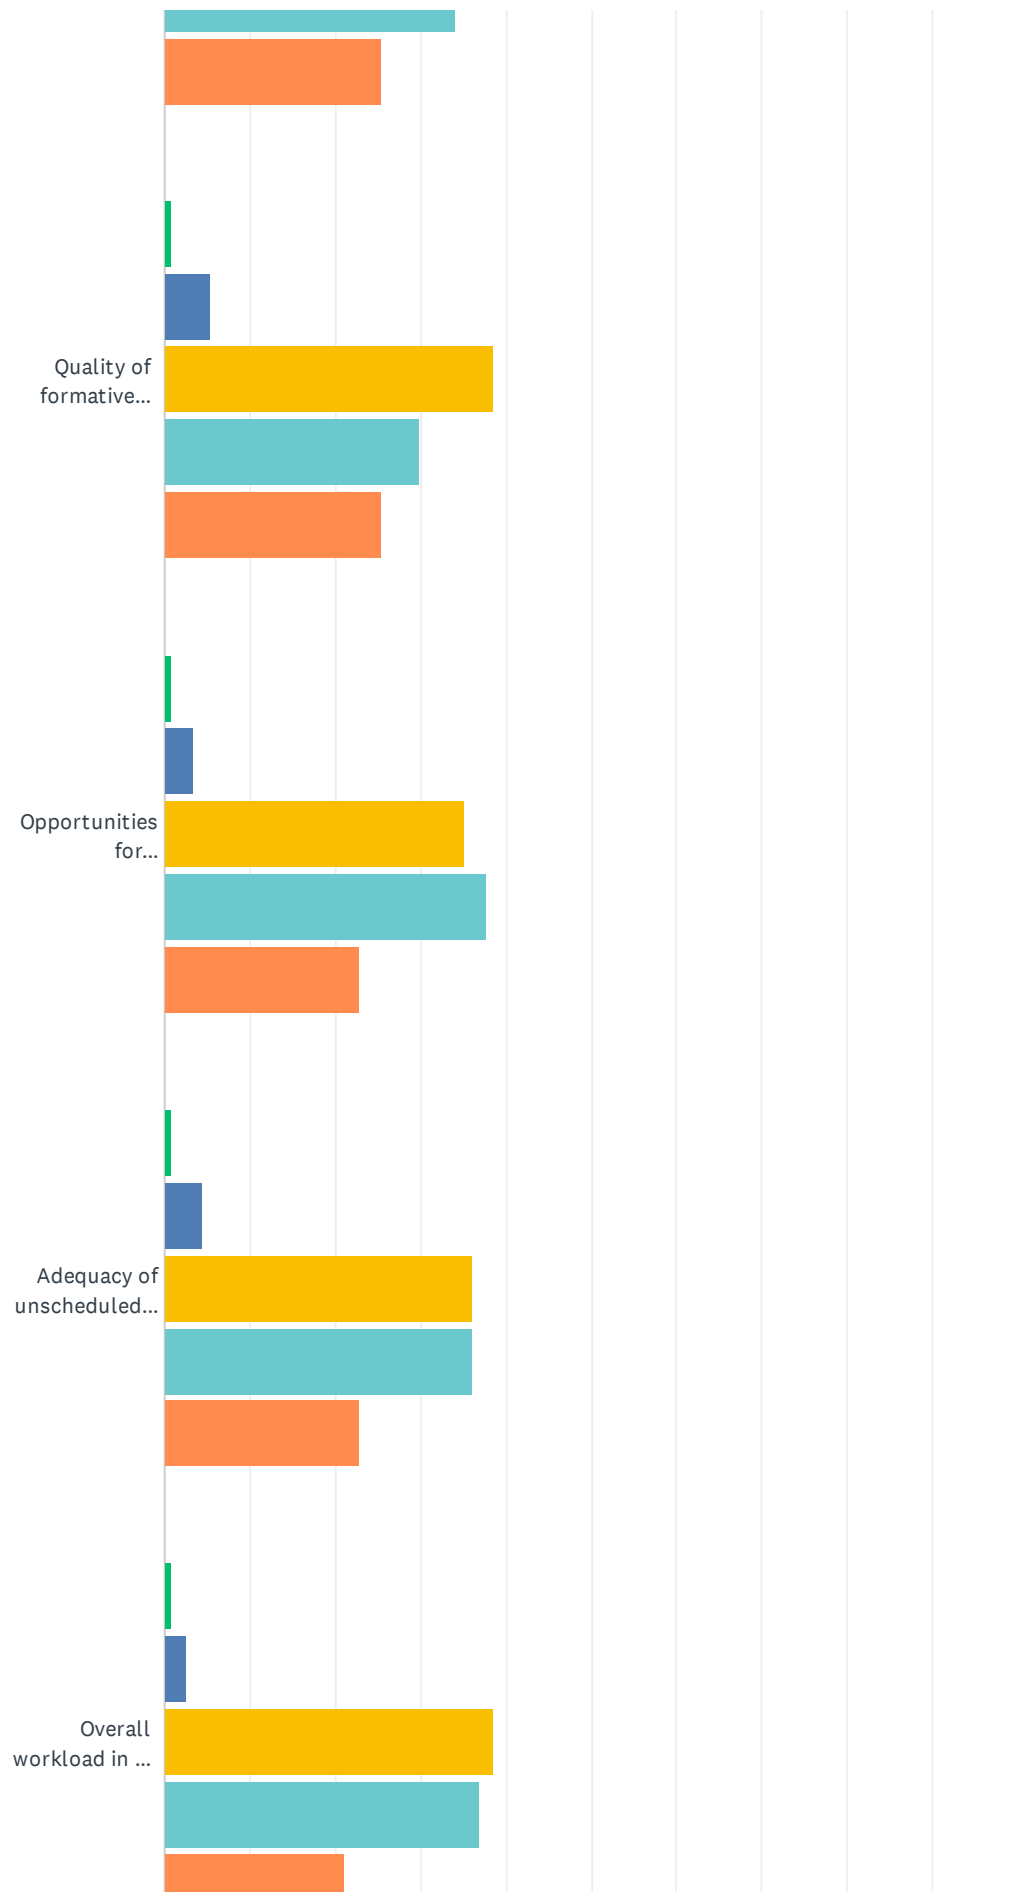

## Clinical Science Program - Institutional Self Study Survey

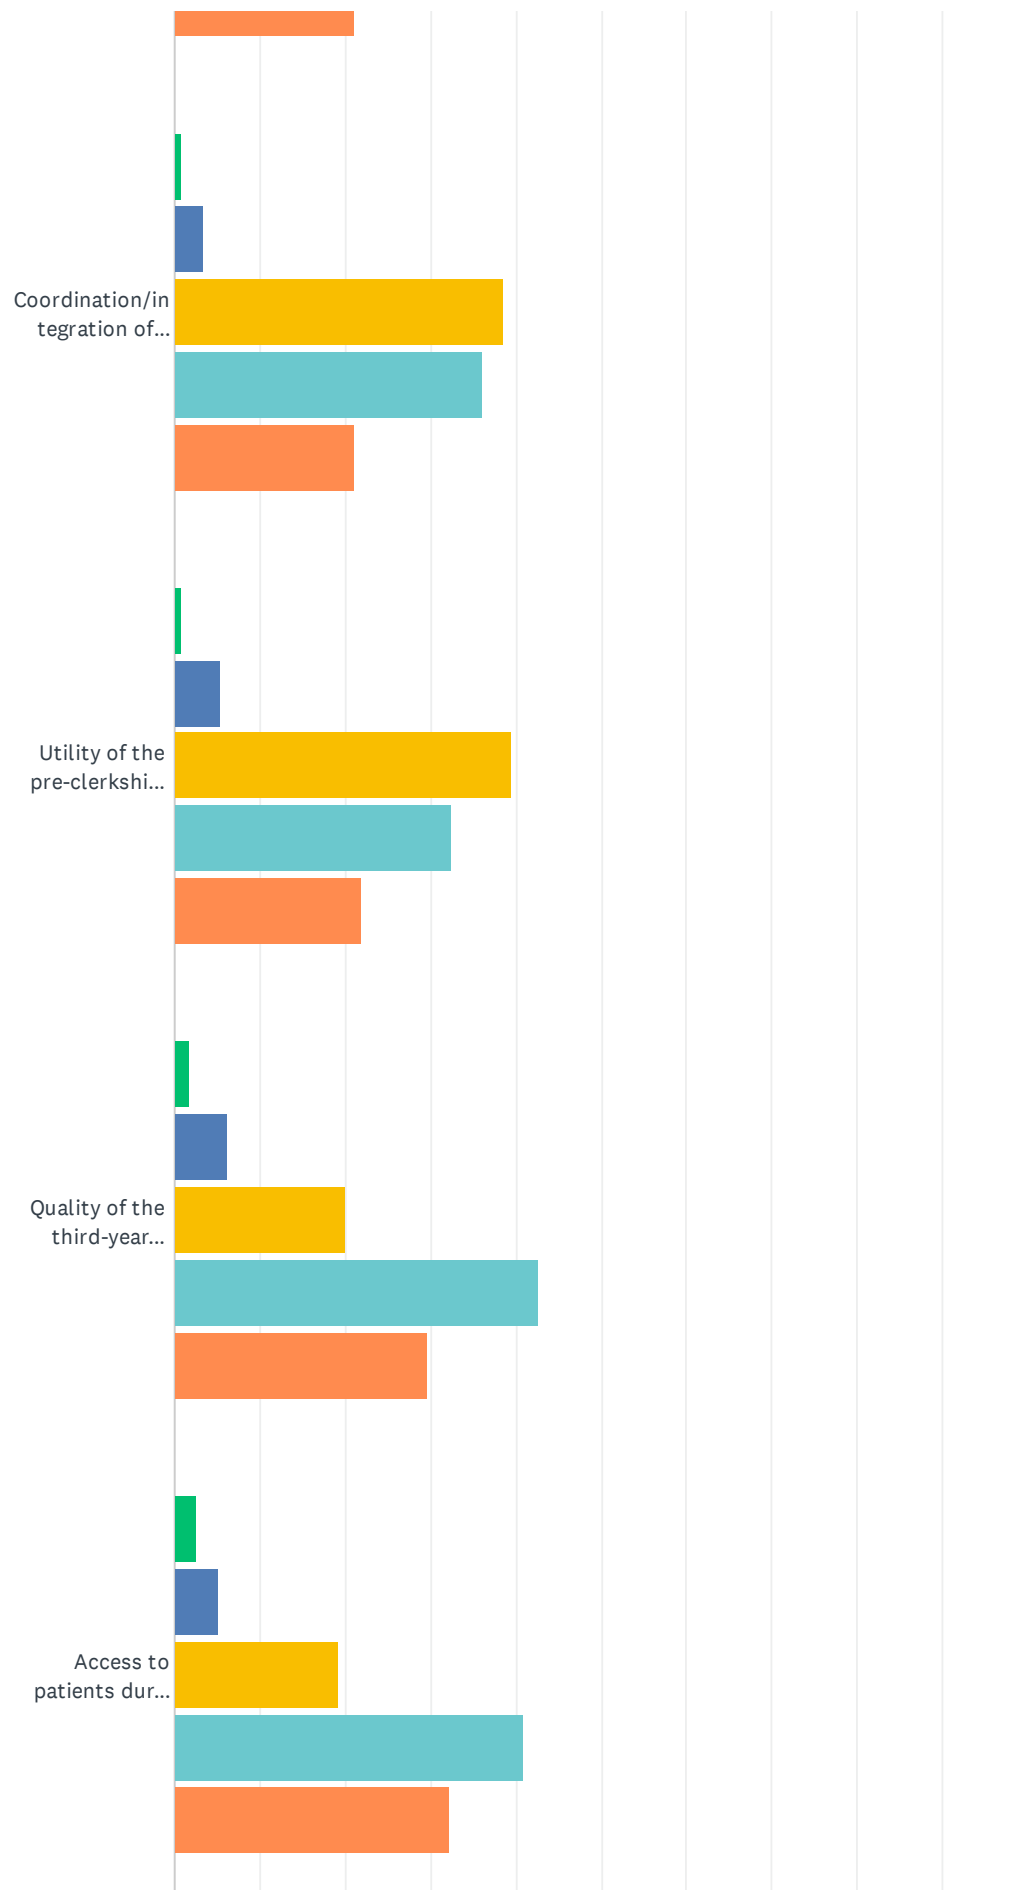

## Clinical Science Program - Institutional Self Study Survey

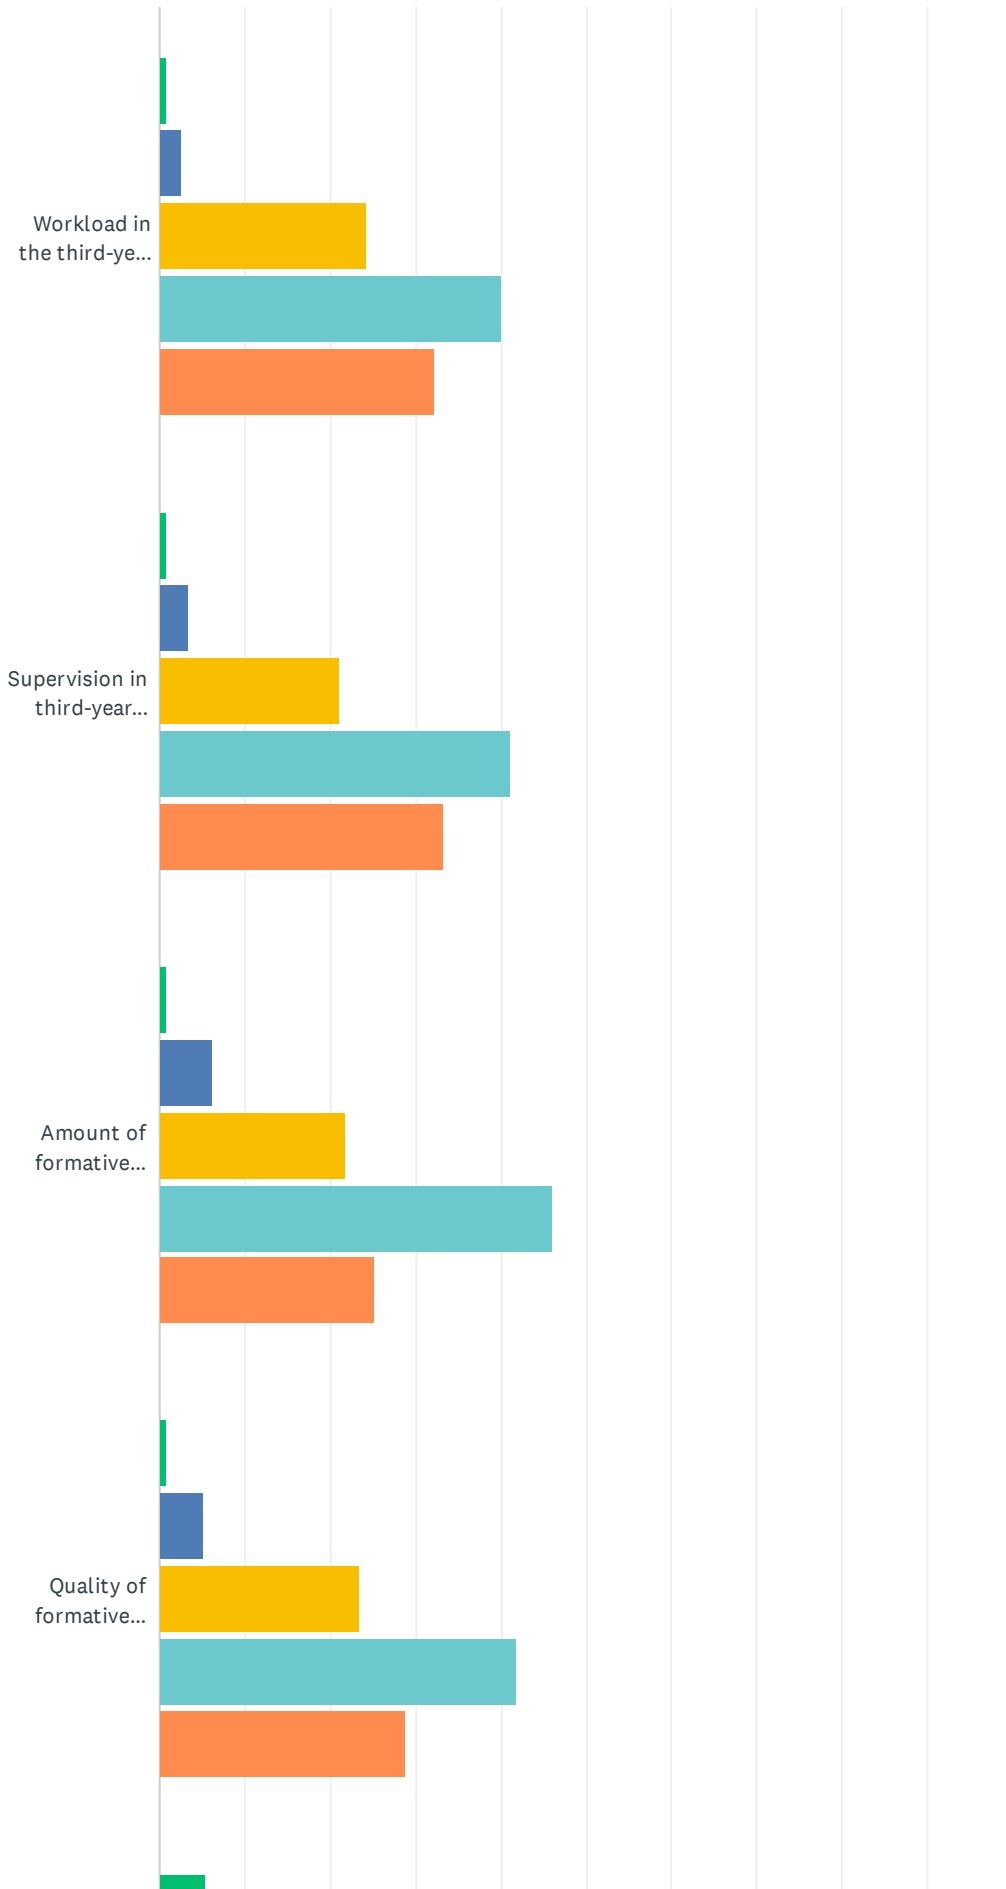

Clinical Science Program - Institutional Self Study Survey

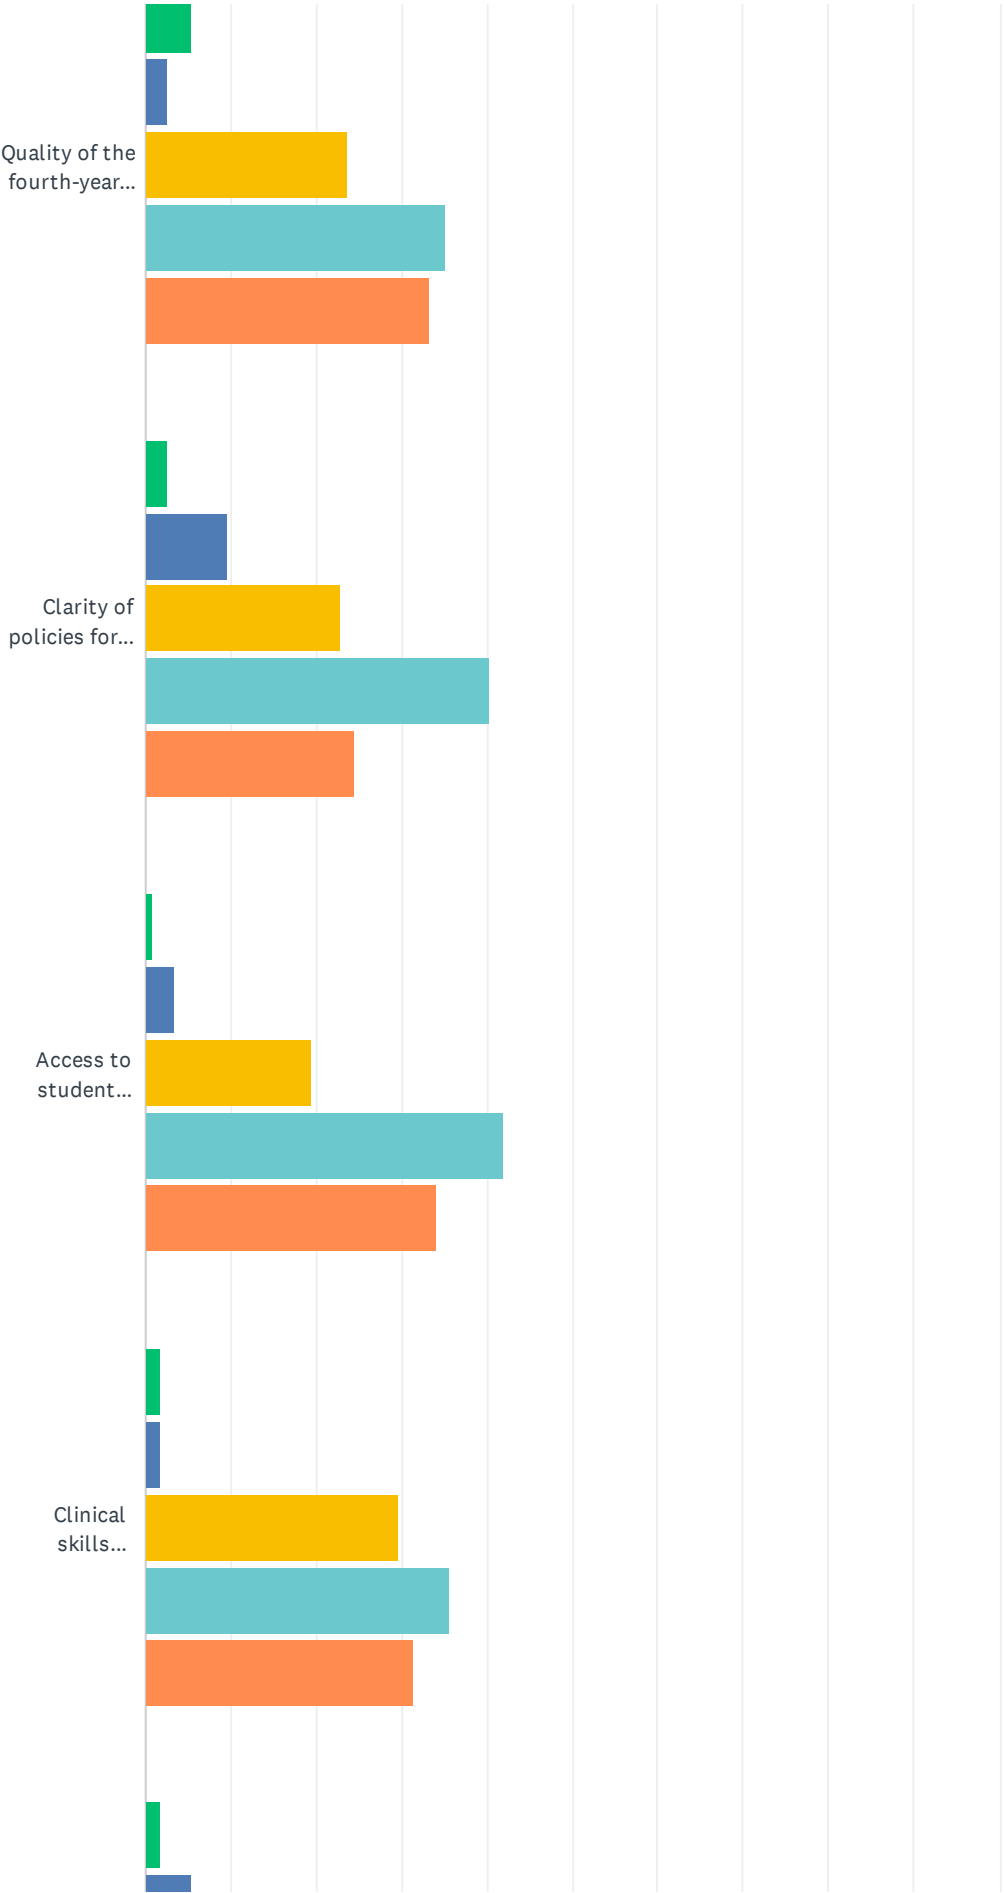



# Clinical Science Program - Institutional Self Study Survey

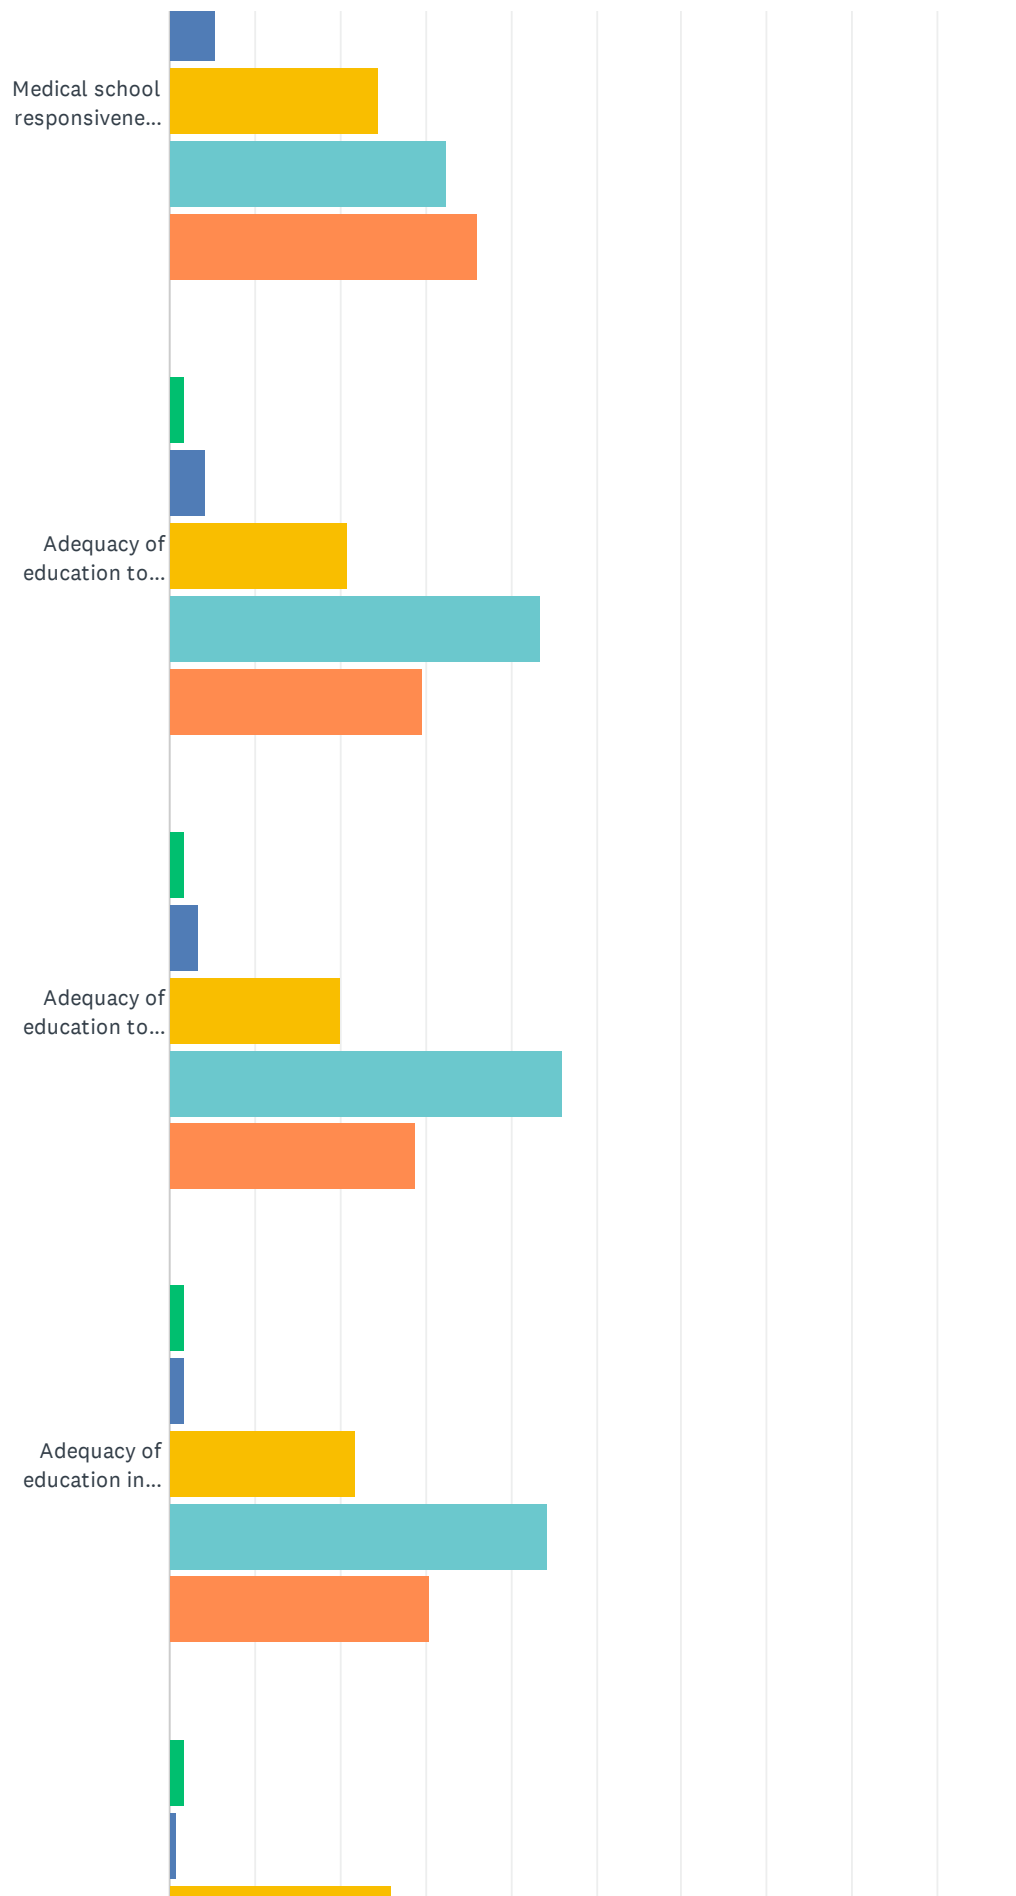

## Clinical Science Program - Institutional Self Study Survey

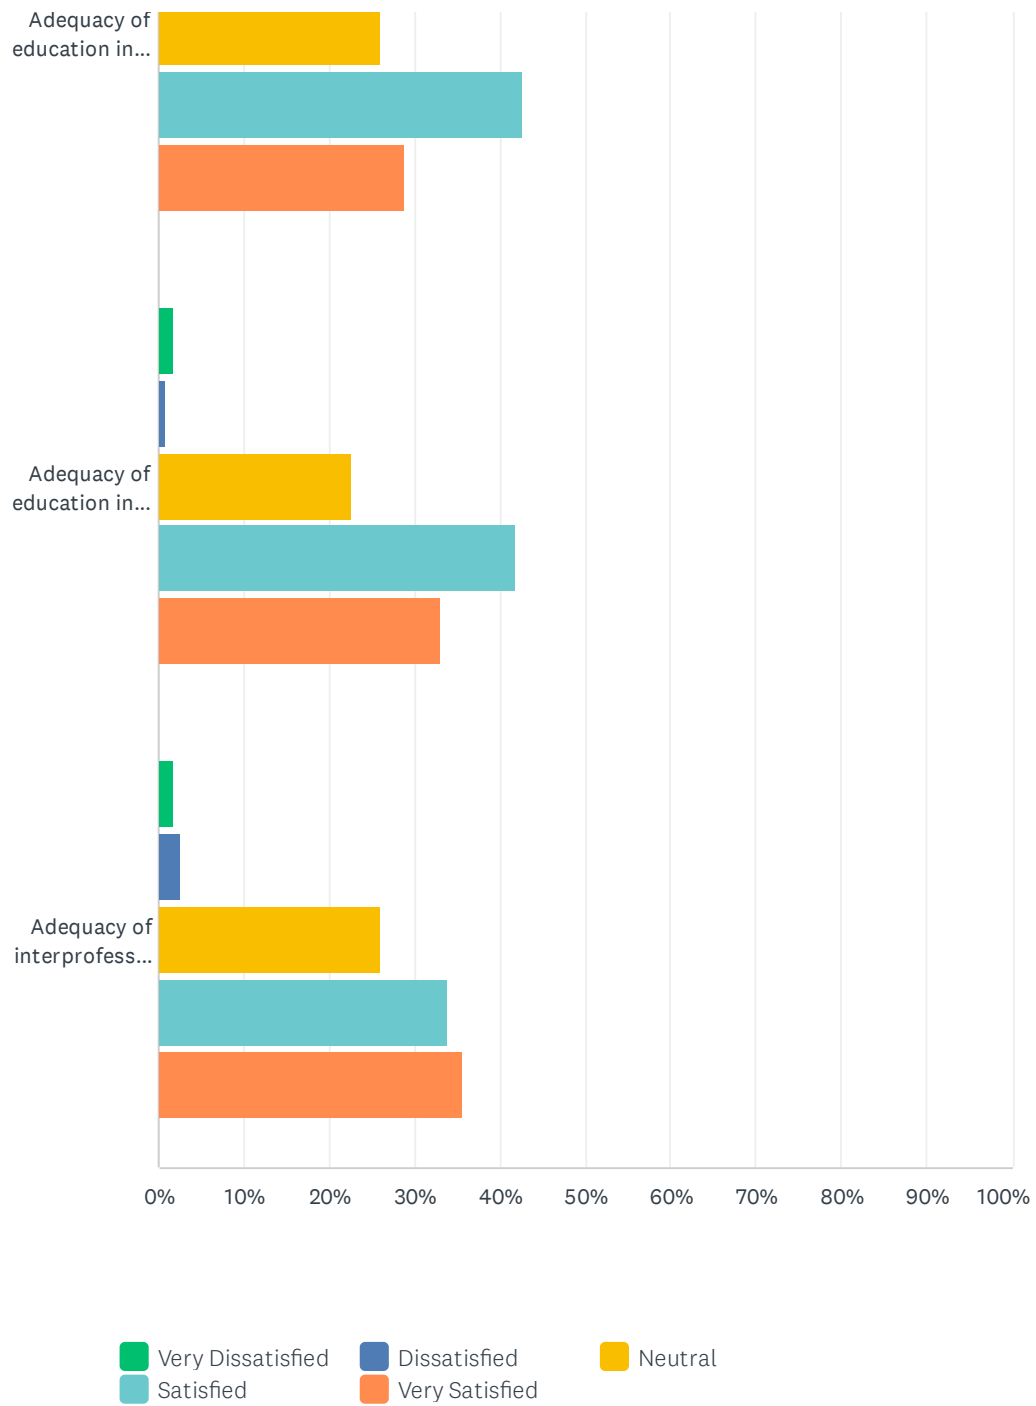

# Clinical Science Program - Institutional Self Study Survey

|                                                                                            | VERY<br>DISSATISFIED | DISSATISFIED | NEUTRAL      | SATISFIED    | VERY<br>SATISFIED | TOTAL | WEIGHTED<br>AVERAGE |
|--------------------------------------------------------------------------------------------|----------------------|--------------|--------------|--------------|-------------------|-------|---------------------|
| Utility of the medical education programme objectives to support learning                  | 1.74%<br>2           | 3.48%<br>4   | 28.70%<br>33 | 40.00%<br>46 | 26.09%<br>30      | 115   | 3.85                |
| Quality of the pre-clerkship (first year/second year)                                      | 0.88%<br>1           | 2.63%<br>3   | 40.35%<br>46 | 32.46%<br>37 | 23.68%<br>27      | 114   | 3.75                |
| Clinical skills instruction in the pre-clerkship (first/second year)                       | 0.88%<br>1           | 4.39%<br>5   | 35.96%<br>41 | 33.33%<br>38 | 25.44%<br>29      | 114   | 3.78                |
| Amount of formative feedback in the pre-clerkship (first/second years)                     | 1.75%<br>2           | 2.63%<br>3   | 35.96%<br>41 | 34.21%<br>39 | 25.44%<br>29      | 114   | 3.79                |
| Quality of formative feedback in the pre-clerkship (first/second years)                    | 0.88%<br>1           | 5.26%<br>6   | 38.60%<br>44 | 29.82%<br>34 | 25.44%<br>29      | 114   | 3.74                |
| Opportunities for self-directed learning in the pre-clerkship (first/second years)         | 0.88%<br>1           | 3.51%<br>4   | 35.09%<br>40 | 37.72%<br>43 | 22.81%<br>26      | 114   | 3.78                |
| Adequacy of unscheduled time for self-directed learning                                    | 0.88%<br>1           | 4.39%<br>5   | 35.96%<br>41 | 35.96%<br>41 | 22.81%<br>26      | 114   | 3.75                |
| Overall workload in the pre-clerkship (first/second years)                                 | 0.88%<br>1           | 2.63%<br>3   | 38.60%<br>44 | 36.84%<br>42 | 21.05%<br>24      | 114   | 3.75                |
| Coordination/integration of content in the pre clerkship (first/second years)              | 0.88%<br>1           | 3.51%<br>4   | 38.60%<br>44 | 35.96%<br>41 | 21.05%<br>24      | 114   | 3.73                |
| Utility of the pre-clerkship first and second years as preparation for clinical clerkships | 0.88%<br>1           | 5.26%<br>6   | 39.47%<br>45 | 32.46%<br>37 | 21.93%<br>25      | 114   | 3.69                |
| Quality of the third-year clerkships                                                       | 1.74%<br>2           | 6.09%<br>7   | 20.00%<br>23 | 42.61%<br>49 | 29.57%<br>34      | 115   | 3.92                |
| Access to patients during the third-year clerkships                                        | 2.61%<br>3           | 5.22%<br>6   | 19.13%<br>22 | 40.87%<br>47 | 32.17%<br>37      | 115   | 3.95                |
| Workload in the third-year clerkships                                                      | 0.87%<br>1           | 2.61%<br>3   | 24.35%<br>28 | 40.00%<br>46 | 32.17%<br>37      | 115   | 4.00                |
| Supervision in third-year clerkships                                                       | 0.88%<br>1           | 3.51%<br>4   | 21.05%<br>24 | 41.23%<br>47 | 33.33%<br>38      | 114   | 4.03                |
| Amount of formative feedback in the third/fourth years                                     | 0.87%<br>1           | 6.09%<br>7   | 21.74%<br>25 | 46.09%<br>53 | 25.22%<br>29      | 115   | 3.89                |
| Quality of formative feedback in the third/fourth years                                    | 0.87%<br>1           | 5.22%<br>6   | 23.48%<br>27 | 41.74%<br>48 | 28.70%<br>33      | 115   | 3.92                |
| Quality of the fourth-year required clerkships                                             | 5.26%<br>6           | 2.63%<br>3   | 23.68%<br>27 | 35.09%<br>40 | 33.33%<br>38      | 114   | 3.89                |

# Clinical Science Program - Institutional Self Study Survey

|                                                                         |            |             |              |              |              |     |      |
|-------------------------------------------------------------------------|------------|-------------|--------------|--------------|--------------|-----|------|
| Clarity of policies for advancement/graduation                          | 2.63%<br>3 | 9.65%<br>11 | 22.81%<br>26 | 40.35%<br>46 | 24.56%<br>28 | 114 | 3.75 |
| Access to student academic records                                      | 0.88%<br>1 | 3.51%<br>4  | 19.30%<br>22 | 42.11%<br>48 | 34.21%<br>39 | 114 | 4.05 |
| Clinical skills assessment in the third/fourth years                    | 1.74%<br>2 | 1.74%<br>2  | 29.57%<br>34 | 35.65%<br>41 | 31.30%<br>36 | 115 | 3.93 |
| Medical school responsiveness to student feedback on courses/clerkships | 1.75%<br>2 | 5.26%<br>6  | 24.56%<br>28 | 32.46%<br>37 | 35.96%<br>41 | 114 | 3.96 |
| Adequacy of education to diagnose disease                               | 1.74%<br>2 | 4.35%<br>5  | 20.87%<br>24 | 43.48%<br>50 | 29.57%<br>34 | 115 | 3.95 |
| Adequacy of education to manage disease                                 | 1.74%<br>2 | 3.48%<br>4  | 20.00%<br>23 | 46.09%<br>53 | 28.70%<br>33 | 115 | 3.97 |
| Adequacy of education in disease prevention                             | 1.74%<br>2 | 1.74%<br>2  | 21.74%<br>25 | 44.35%<br>51 | 30.43%<br>35 | 115 | 4.00 |
| Adequacy of education in health maintenance                             | 1.74%<br>2 | 0.87%<br>1  | 26.09%<br>30 | 42.61%<br>49 | 28.70%<br>33 | 115 | 3.96 |
| Adequacy of education in caring for patients from different backgrounds | 1.74%<br>2 | 0.87%<br>1  | 22.61%<br>26 | 41.74%<br>48 | 33.04%<br>38 | 115 | 4.03 |
| Adequacy of interprofessional education experiences                     | 1.74%<br>2 | 2.61%<br>3  | 26.09%<br>30 | 33.91%<br>39 | 35.65%<br>41 | 115 | 3.99 |
