# Supplementary material
Source: publisher site journal article supplement (https://www.dovepress.com/article/607785)
Supplement: Supplementary file 2 [file Appendix B.pdf › Appendix B.pdf]

Q1 Dean's Office

Answered: 62    Skipped: 0

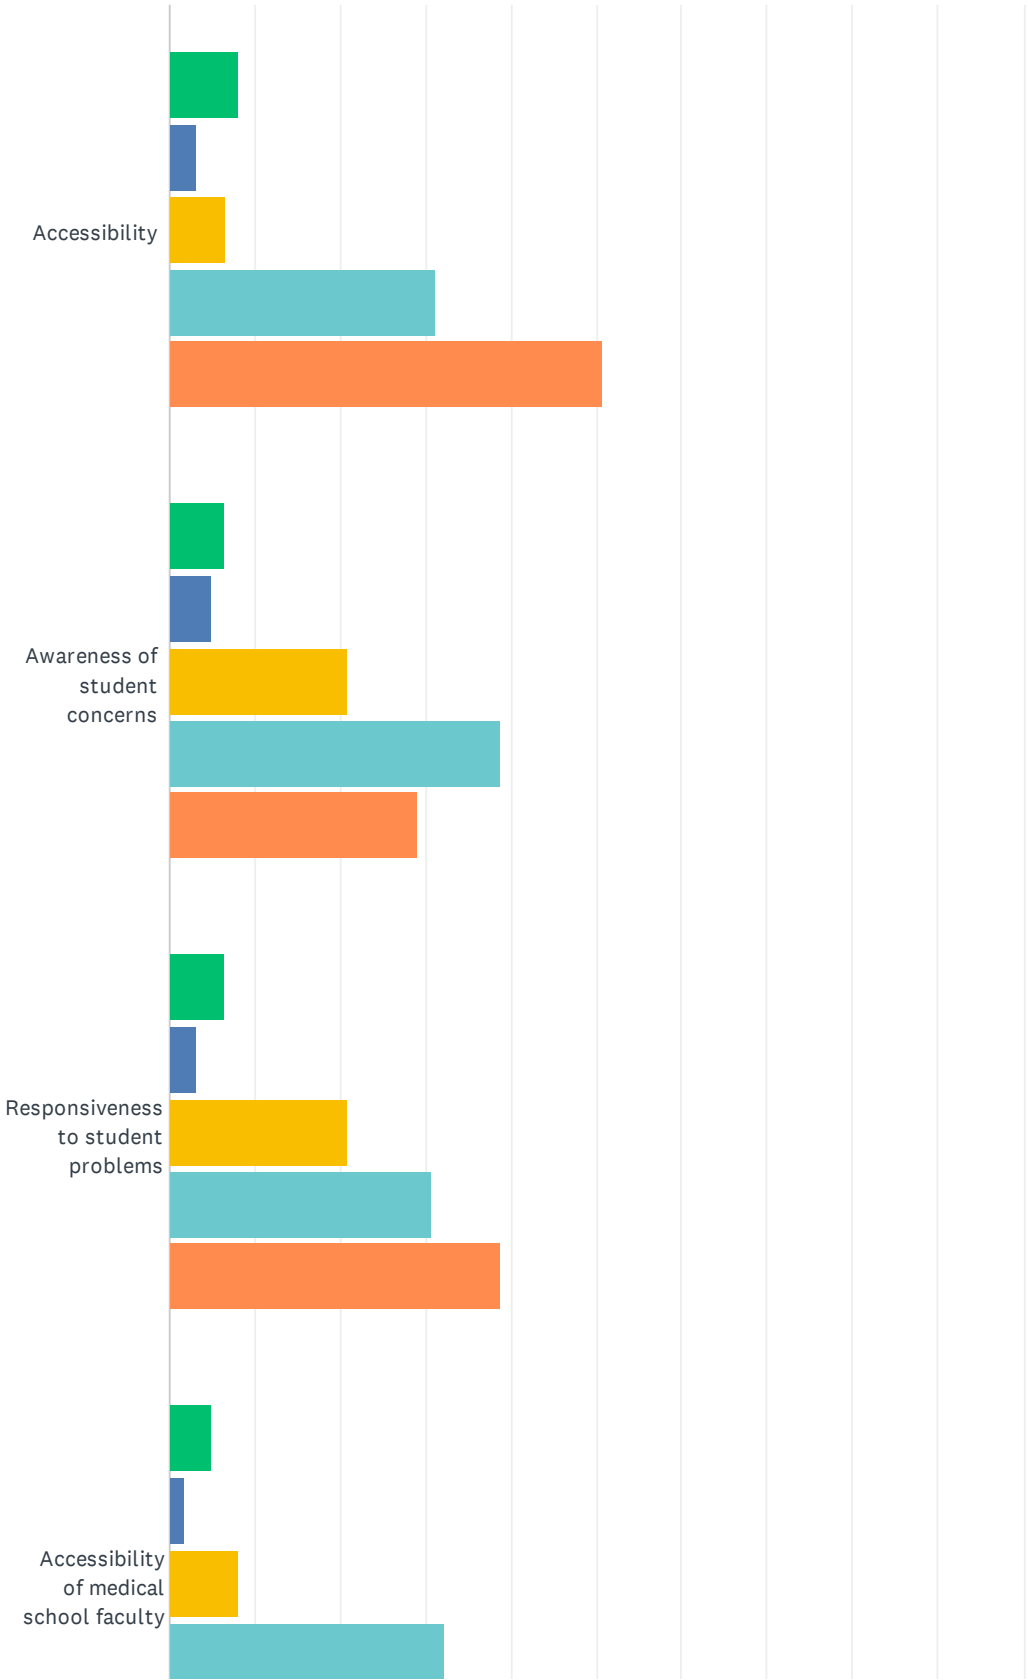

## Basic Science Program - Institutional Self Study Survey 2024

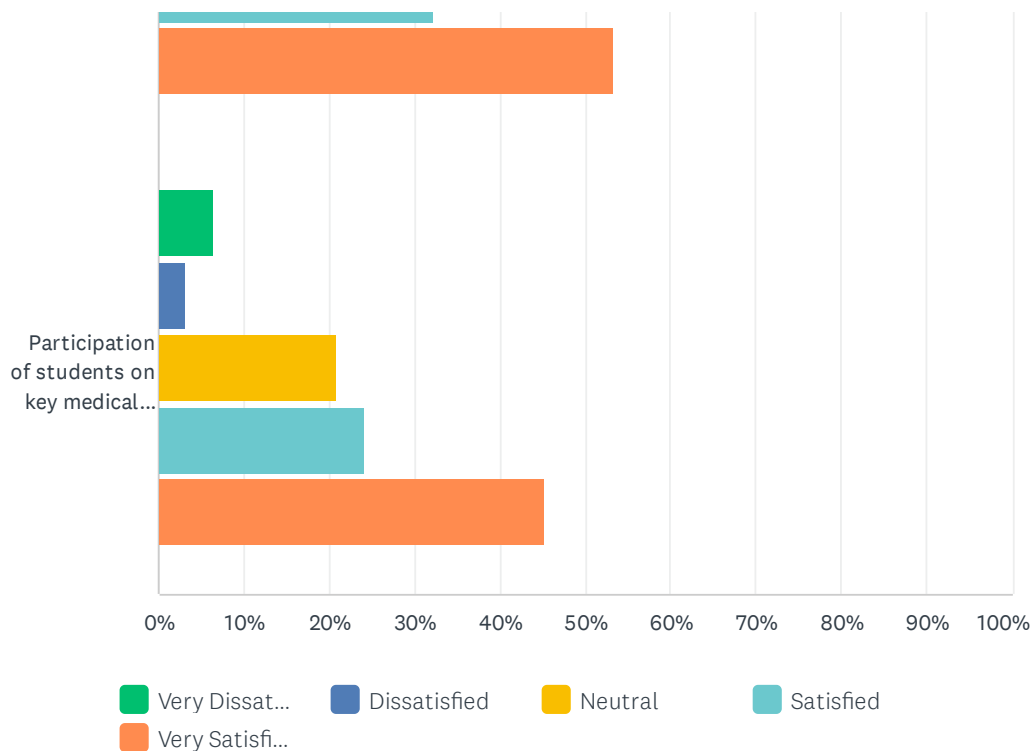

|                                                            | VERY DISSATISFIED | DISSATISFIED | NEUTRAL      | SATISFIED    | VERY SATISFIED | TOTAL | WEIGHTED AVERAGE |
|------------------------------------------------------------|-------------------|--------------|--------------|--------------|----------------|-------|------------------|
| Accessibility                                              | 8.20%<br>5        | 3.28%<br>2   | 6.56%<br>4   | 31.15%<br>19 | 50.82%<br>31   | 61    | 4.13             |
| Awareness of student concerns                              | 6.45%<br>4        | 4.84%<br>3   | 20.97%<br>13 | 38.71%<br>24 | 29.03%<br>18   | 62    | 3.79             |
| Responsiveness to student problems                         | 6.45%<br>4        | 3.23%<br>2   | 20.97%<br>13 | 30.65%<br>19 | 38.71%<br>24   | 62    | 3.92             |
| Accessibility of medical school faculty                    | 4.84%<br>3        | 1.61%<br>1   | 8.06%<br>5   | 32.26%<br>20 | 53.23%<br>33   | 62    | 4.27             |
| Participation of students on key medical school committees | 6.45%<br>4        | 3.23%<br>2   | 20.97%<br>13 | 24.19%<br>15 | 45.16%<br>28   | 62    | 3.98             |

## Q2 LEARNING ENVIRONMENT AND FACILITIES

Answered: 62    Skipped: 0

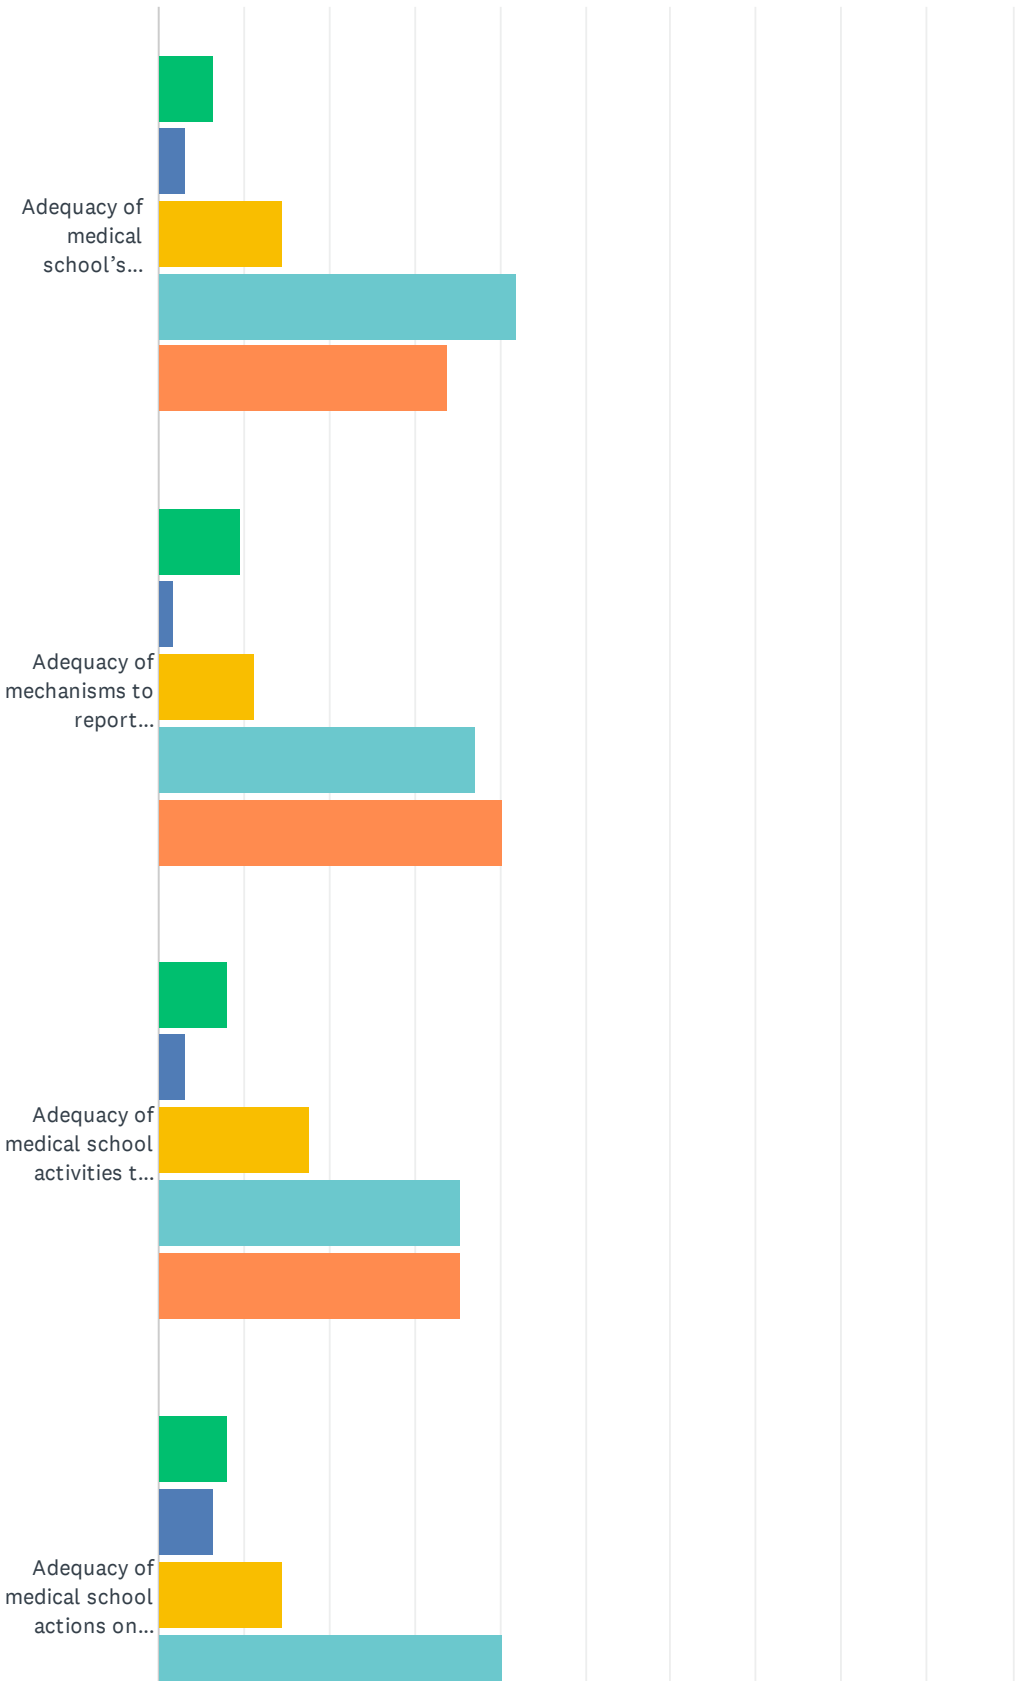

Basic Science Program - Institutional Self Study Survey 2024

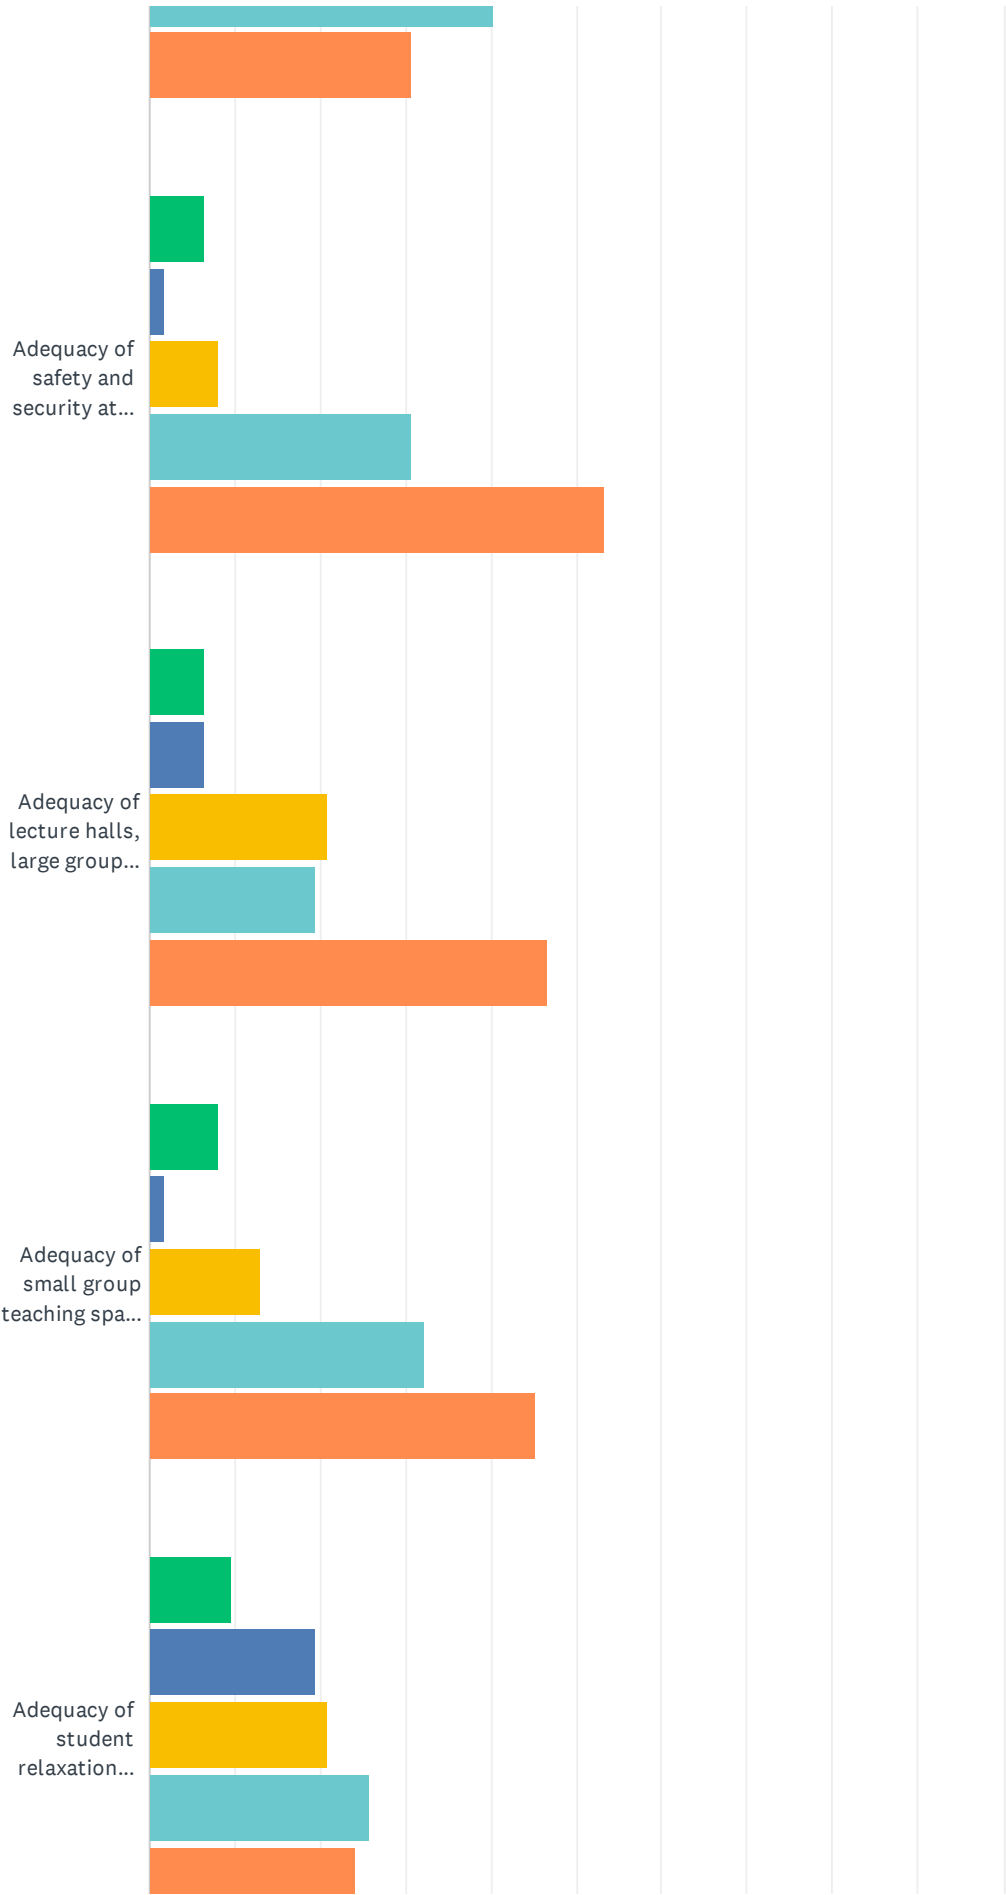

Basic Science Program - Institutional Self Study Survey 2024

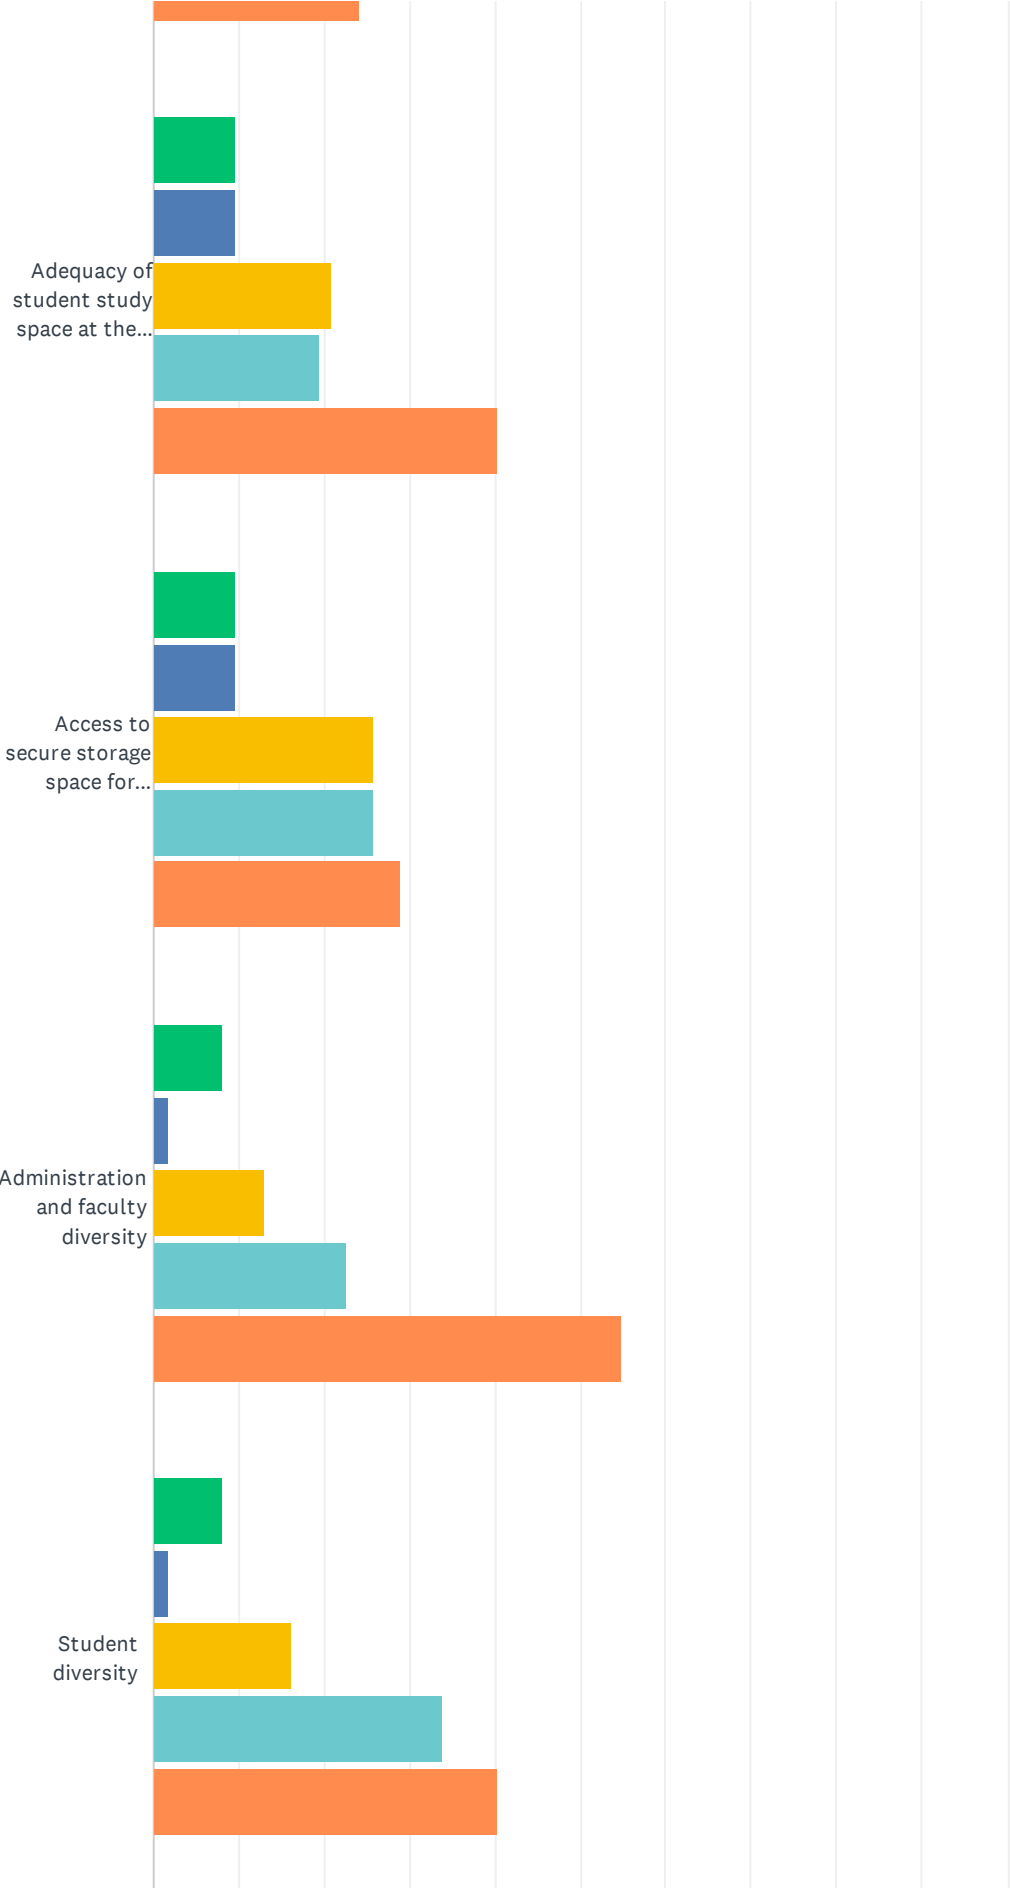

Basic Science Program - Institutional Self Study Survey 2024

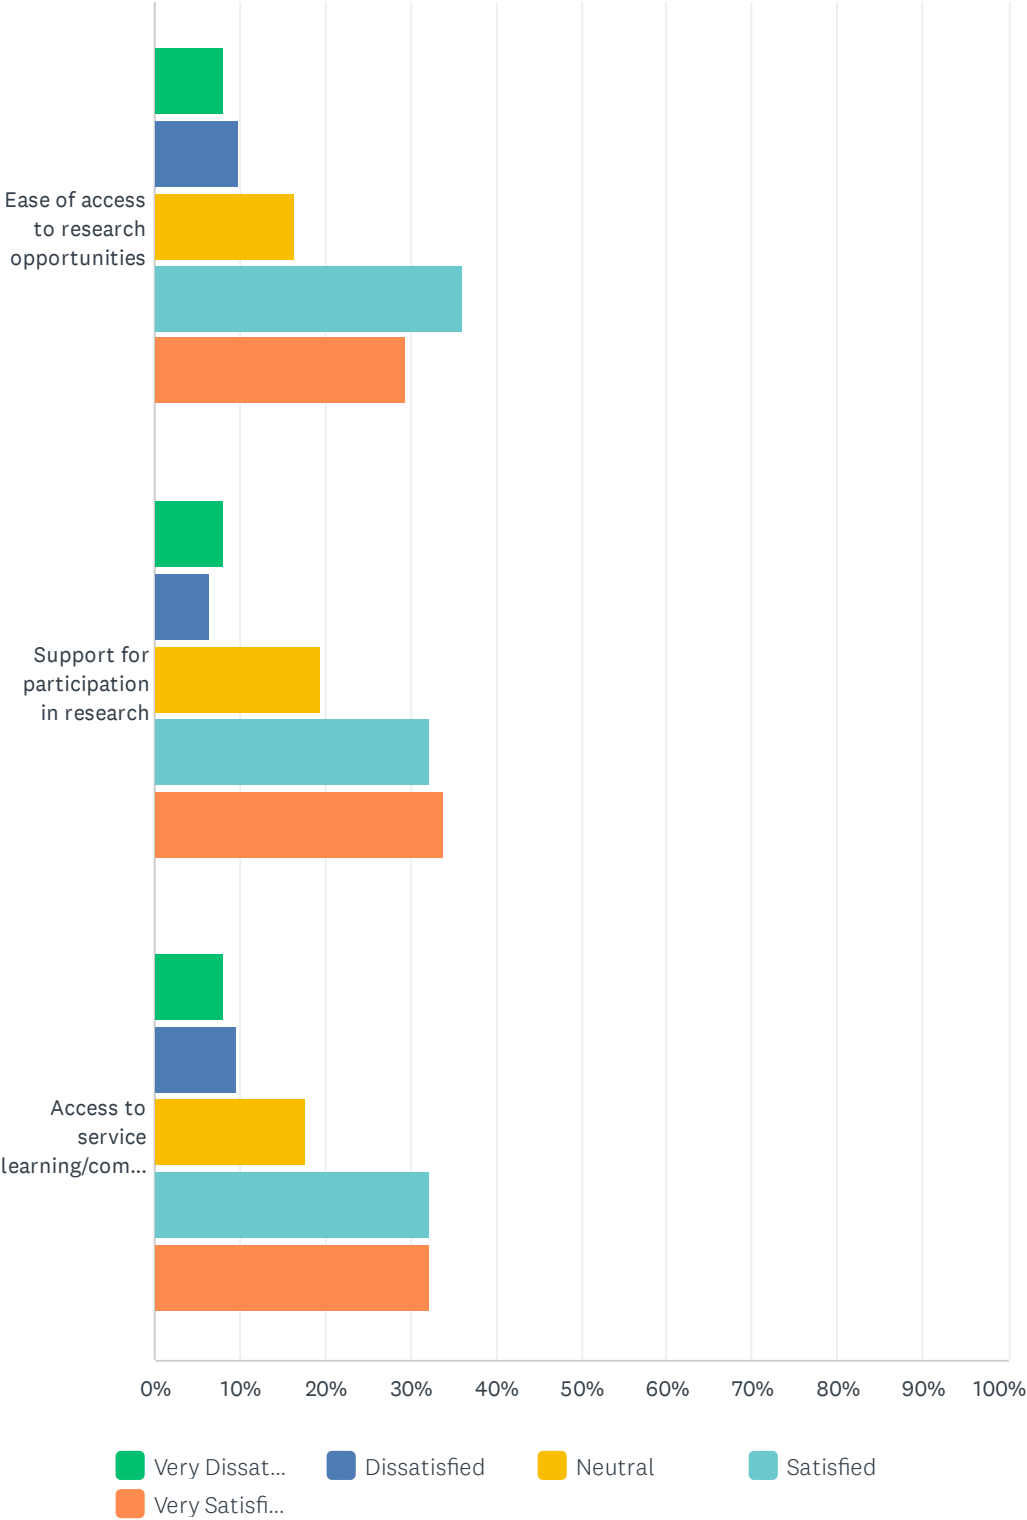

# Basic Science Program - Institutional Self Study Survey 2024

|                                                                                     | VERY<br>DISSATISFIED | DISSATISFIED | NEUTRAL      | SATISFIED    | VERY<br>SATISFIED | TOTAL | WEIGHTED<br>AVERAGE |
|-------------------------------------------------------------------------------------|----------------------|--------------|--------------|--------------|-------------------|-------|---------------------|
| Adequacy of medical school's student mistreatment policy                            | 6.45%<br>4           | 3.23%<br>2   | 14.52%<br>9  | 41.94%<br>26 | 33.87%<br>21      | 62    | 3.94                |
| Adequacy of mechanisms to report mistreatment                                       | 9.68%<br>6           | 1.61%<br>1   | 11.29%<br>7  | 37.10%<br>23 | 40.32%<br>25      | 62    | 3.97                |
| Adequacy of medical school activities to prevent mistreatment                       | 8.06%<br>5           | 3.23%<br>2   | 17.74%<br>11 | 35.48%<br>22 | 35.48%<br>22      | 62    | 3.87                |
| Adequacy of medical school actions on reports of mistreatment                       | 8.06%<br>5           | 6.45%<br>4   | 14.52%<br>9  | 40.32%<br>25 | 30.65%<br>19      | 62    | 3.79                |
| Adequacy of safety and security at medical school campus                            | 6.45%<br>4           | 1.61%<br>1   | 8.06%<br>5   | 30.65%<br>19 | 53.23%<br>33      | 62    | 4.23                |
| Adequacy of lecture halls, large group classroom facilities                         | 6.45%<br>4           | 6.45%<br>4   | 20.97%<br>13 | 19.35%<br>12 | 46.77%<br>29      | 62    | 3.94                |
| Adequacy of small group teaching spaces on campus                                   | 8.06%<br>5           | 1.61%<br>1   | 12.90%<br>8  | 32.26%<br>20 | 45.16%<br>28      | 62    | 4.05                |
| Adequacy of student relaxation space at the medical school campus                   | 9.68%<br>6           | 19.35%<br>12 | 20.97%<br>13 | 25.81%<br>16 | 24.19%<br>15      | 62    | 3.35                |
| Adequacy of student study space at the medical school campus                        | 9.68%<br>6           | 9.68%<br>6   | 20.97%<br>13 | 19.35%<br>12 | 40.32%<br>25      | 62    | 3.71                |
| Access to secure storage space for personal belongings at the medical school campus | 9.68%<br>6           | 9.68%<br>6   | 25.81%<br>16 | 25.81%<br>16 | 29.03%<br>18      | 62    | 3.55                |
| Administration and faculty diversity                                                | 8.06%<br>5           | 1.61%<br>1   | 12.90%<br>8  | 22.58%<br>14 | 54.84%<br>34      | 62    | 4.15                |
| Student diversity                                                                   | 8.06%<br>5           | 1.61%<br>1   | 16.13%<br>10 | 33.87%<br>21 | 40.32%<br>25      | 62    | 3.97                |
| Ease of access to research opportunities                                            | 8.20%<br>5           | 9.84%<br>6   | 16.39%<br>10 | 36.07%<br>22 | 29.51%<br>18      | 61    | 3.69                |
| Support for participation in research                                               | 8.06%<br>5           | 6.45%<br>4   | 19.35%<br>12 | 32.26%<br>20 | 33.87%<br>21      | 62    | 3.77                |
| Access to service learning/community service opportunities                          | 8.06%<br>5           | 9.68%<br>6   | 17.74%<br>11 | 32.26%<br>20 | 32.26%<br>20      | 62    | 3.71                |

# Q3 LIBRARY AND INFORMATION RESOURCES

Answered: 62    Skipped: 0

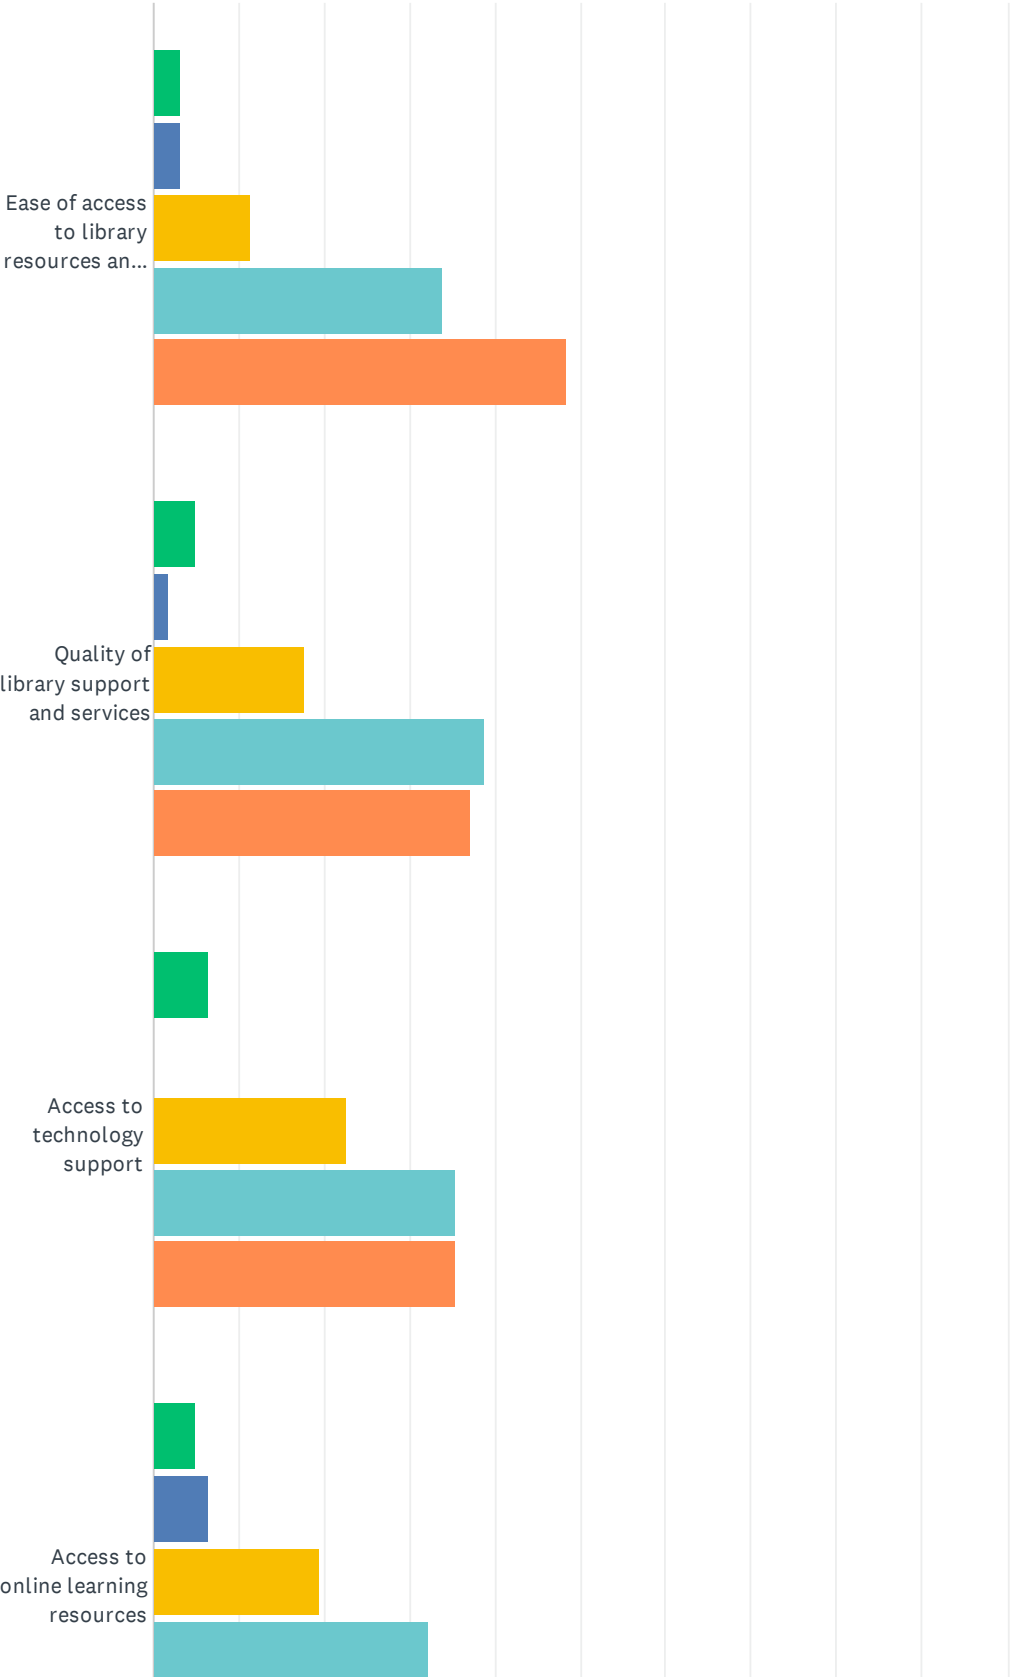



## Basic Science Program - Institutional Self Study Survey 2024

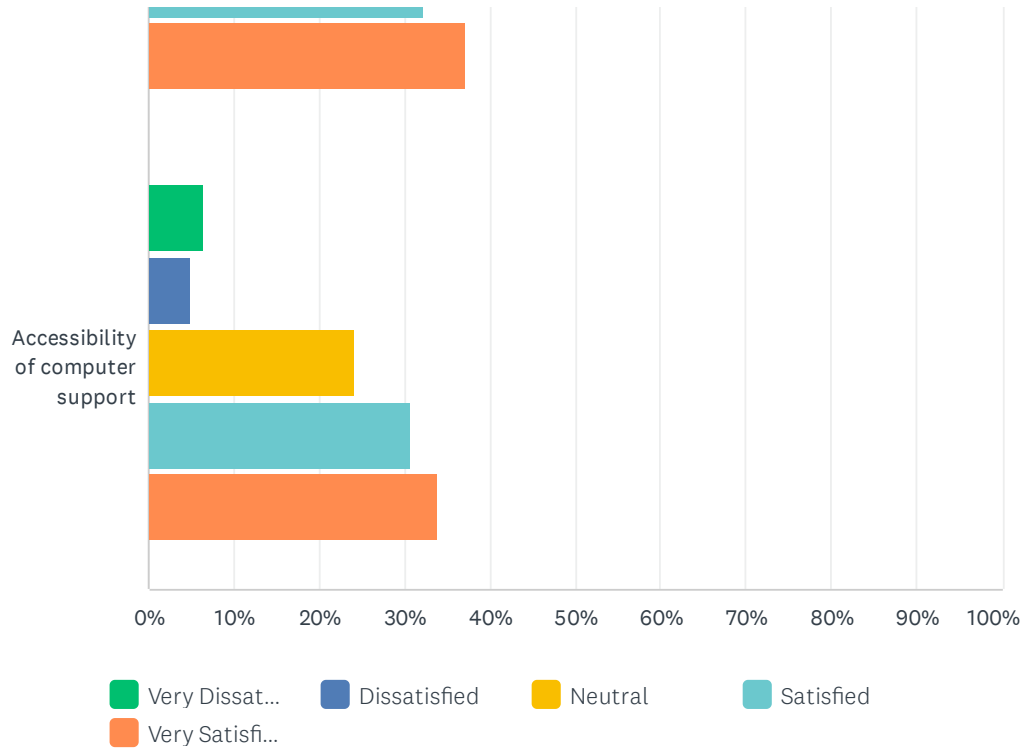

|                                                  | VERY DISSATISFIED | DISSATISFIED | NEUTRAL      | SATISFIED    | VERY SATISFIED | TOTAL | WEIGHTED AVERAGE |
|--------------------------------------------------|-------------------|--------------|--------------|--------------|----------------|-------|------------------|
| Ease of access to library resources and holdings | 3.23%<br>2        | 3.23%<br>2   | 11.29%<br>7  | 33.87%<br>21 | 48.39%<br>30   | 62    | 4.21             |
| Quality of library support and services          | 4.84%<br>3        | 1.61%<br>1   | 17.74%<br>11 | 38.71%<br>24 | 37.10%<br>23   | 62    | 4.02             |
| Access to technology support                     | 6.45%<br>4        | 0.00%<br>0   | 22.58%<br>14 | 35.48%<br>22 | 35.48%<br>22   | 62    | 3.94             |
| Access to online learning resources              | 4.84%<br>3        | 6.45%<br>4   | 19.35%<br>12 | 32.26%<br>20 | 37.10%<br>23   | 62    | 3.90             |
| Accessibility of computer support                | 6.45%<br>4        | 4.84%<br>3   | 24.19%<br>15 | 30.65%<br>19 | 33.87%<br>21   | 62    | 3.81             |

# Q4 STUDENT SERVICES

Answered: 62    Skipped: 0

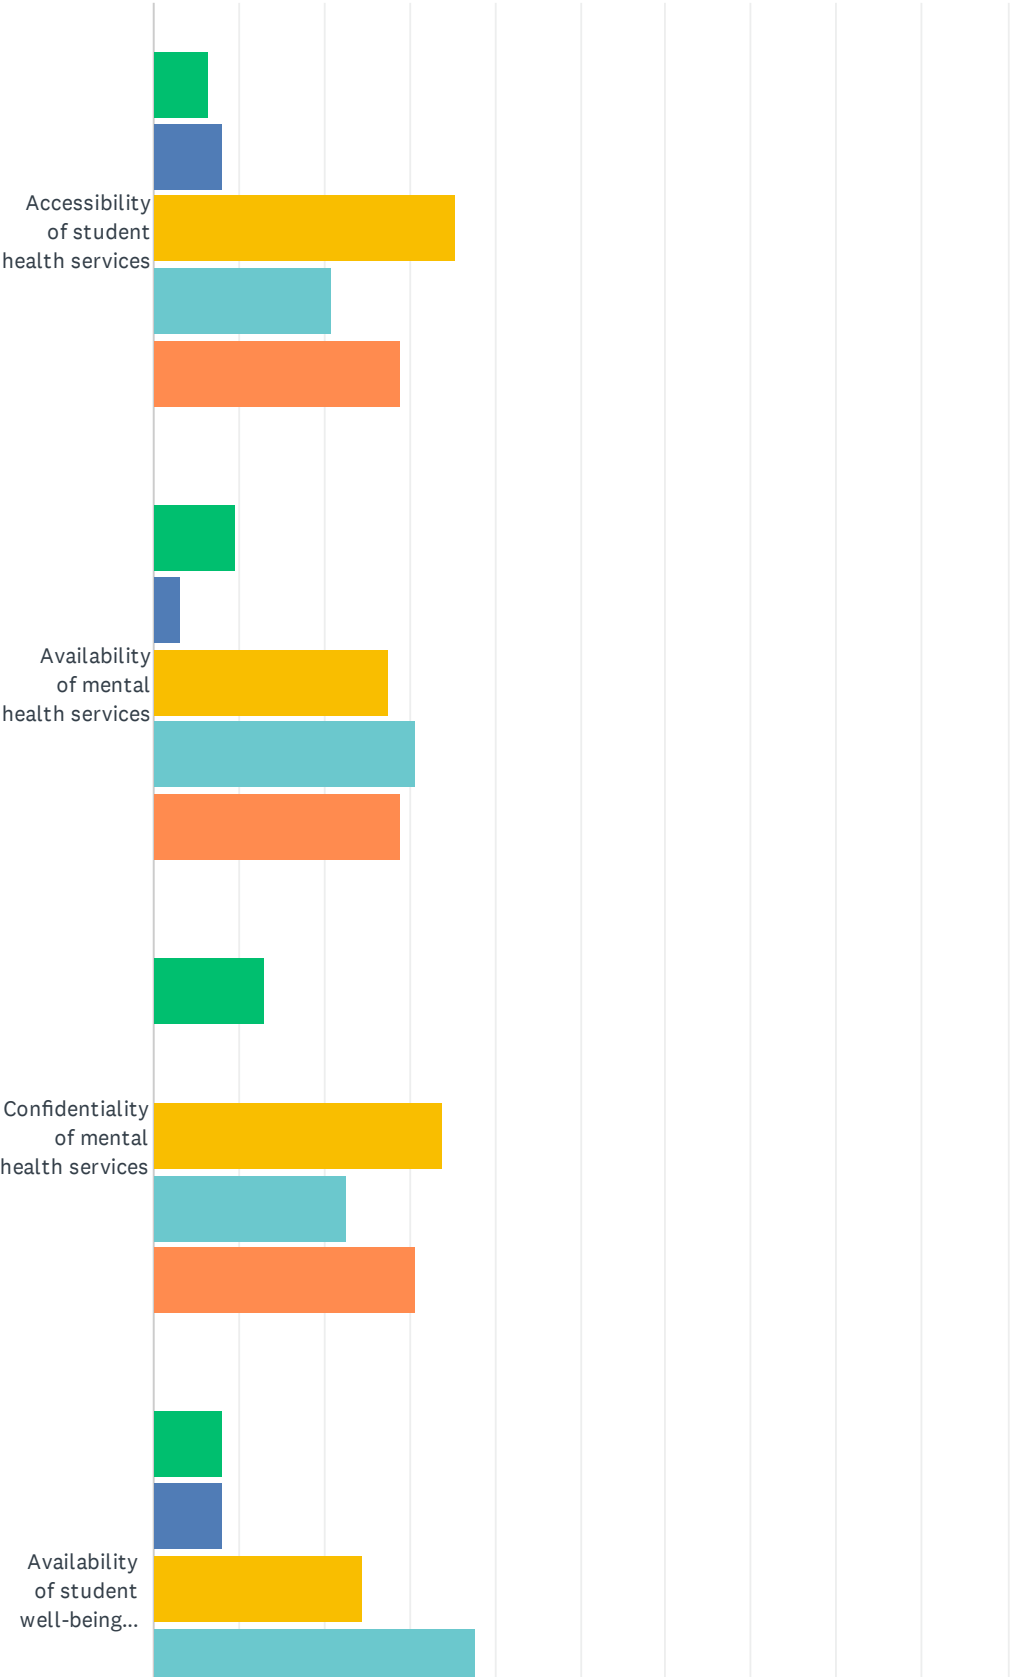

Basic Science Program - Institutional Self Study Survey 2024

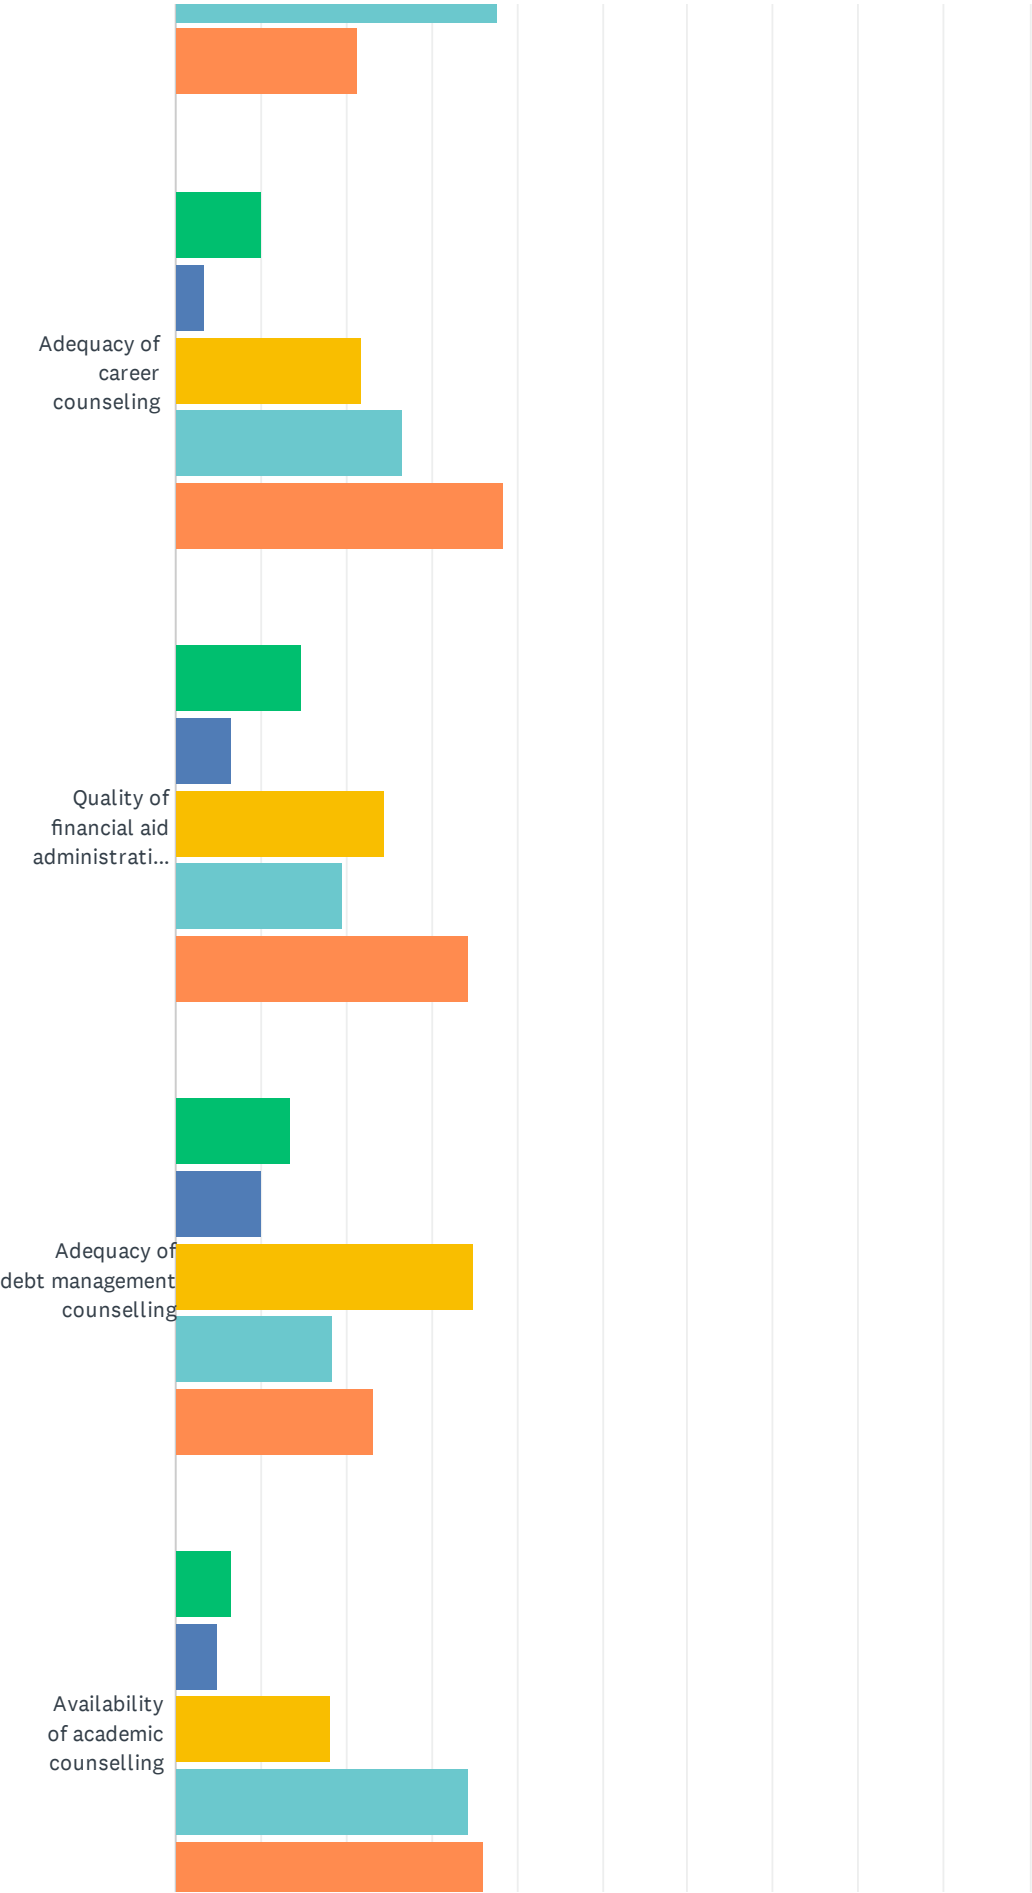

Basic Science Program - Institutional Self Study Survey 2024

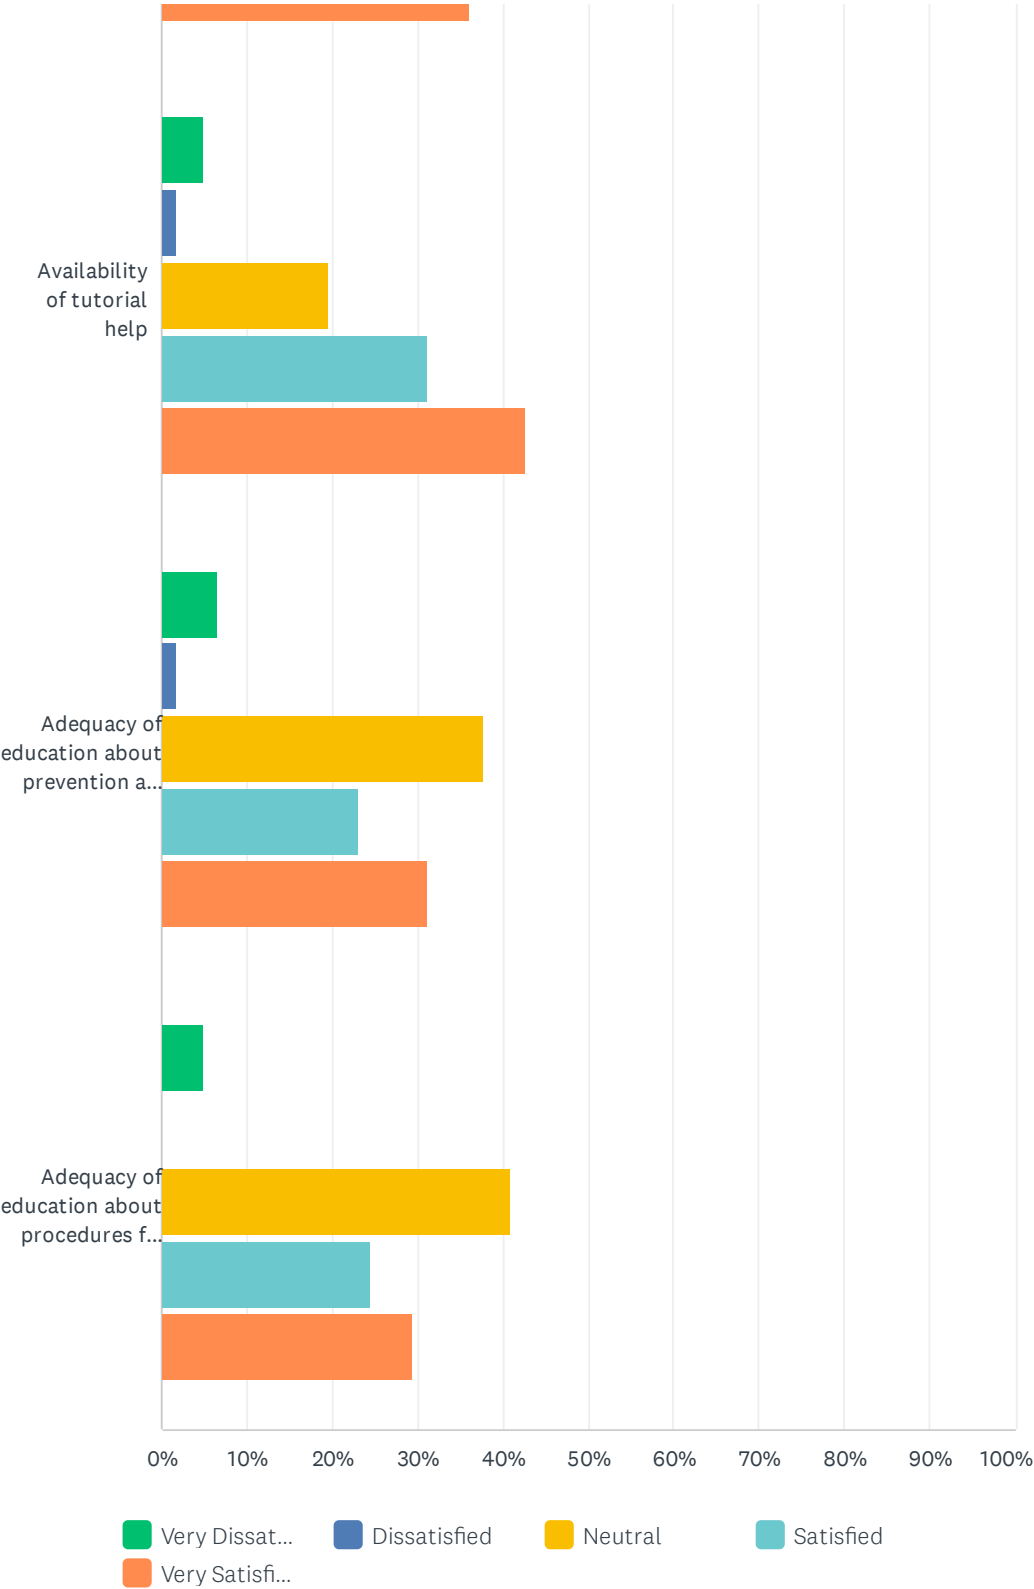

# Basic Science Program - Institutional Self Study Survey 2024

|                                                                                                                      | VERY<br>DISSATISFIED | DISSATISFIED | NEUTRAL      | SATISFIED    | VERY<br>SATISFIED | TOTAL | WEIGHTED<br>AVERAGE |
|----------------------------------------------------------------------------------------------------------------------|----------------------|--------------|--------------|--------------|-------------------|-------|---------------------|
| Accessibility of student health services                                                                             | 6.45%<br>4           | 8.06%<br>5   | 35.48%<br>22 | 20.97%<br>13 | 29.03%<br>18      | 62    | 3.58                |
| Availability of mental health services                                                                               | 9.68%<br>6           | 3.23%<br>2   | 27.42%<br>17 | 30.65%<br>19 | 29.03%<br>18      | 62    | 3.66                |
| Confidentiality of mental health services                                                                            | 12.90%<br>8          | 0.00%<br>0   | 33.87%<br>21 | 22.58%<br>14 | 30.65%<br>19      | 62    | 3.58                |
| Availability of student well-being programmes                                                                        | 8.20%<br>5           | 8.20%<br>5   | 24.59%<br>15 | 37.70%<br>23 | 21.31%<br>13      | 61    | 3.56                |
| Adequacy of career counseling                                                                                        | 10.00%<br>6          | 3.33%<br>2   | 21.67%<br>13 | 26.67%<br>16 | 38.33%<br>23      | 60    | 3.80                |
| Quality of financial aid administrative services                                                                     | 14.75%<br>9          | 6.56%<br>4   | 24.59%<br>15 | 19.67%<br>12 | 34.43%<br>21      | 61    | 3.52                |
| Adequacy of debt management counselling                                                                              | 13.33%<br>8          | 10.00%<br>6  | 35.00%<br>21 | 18.33%<br>11 | 23.33%<br>14      | 60    | 3.28                |
| Availability of academic counselling                                                                                 | 6.56%<br>4           | 4.92%<br>3   | 18.03%<br>11 | 34.43%<br>21 | 36.07%<br>22      | 61    | 3.89                |
| Availability of tutorial help                                                                                        | 4.92%<br>3           | 1.64%<br>1   | 19.67%<br>12 | 31.15%<br>19 | 42.62%<br>26      | 61    | 4.05                |
| Adequacy of education about prevention and exposure to infectious and environmental hazards                          | 6.56%<br>4           | 1.64%<br>1   | 37.70%<br>23 | 22.95%<br>14 | 31.15%<br>19      | 61    | 3.70                |
| Adequacy of education about procedures for care and treatment after exposure to infectious and environmental hazards | 4.92%<br>3           | 0.00%<br>0   | 40.98%<br>25 | 24.59%<br>15 | 29.51%<br>18      | 61    | 3.74                |

Q5 MEDICAL EDUCATION PROGRAMME

Answered: 61    Skipped: 1

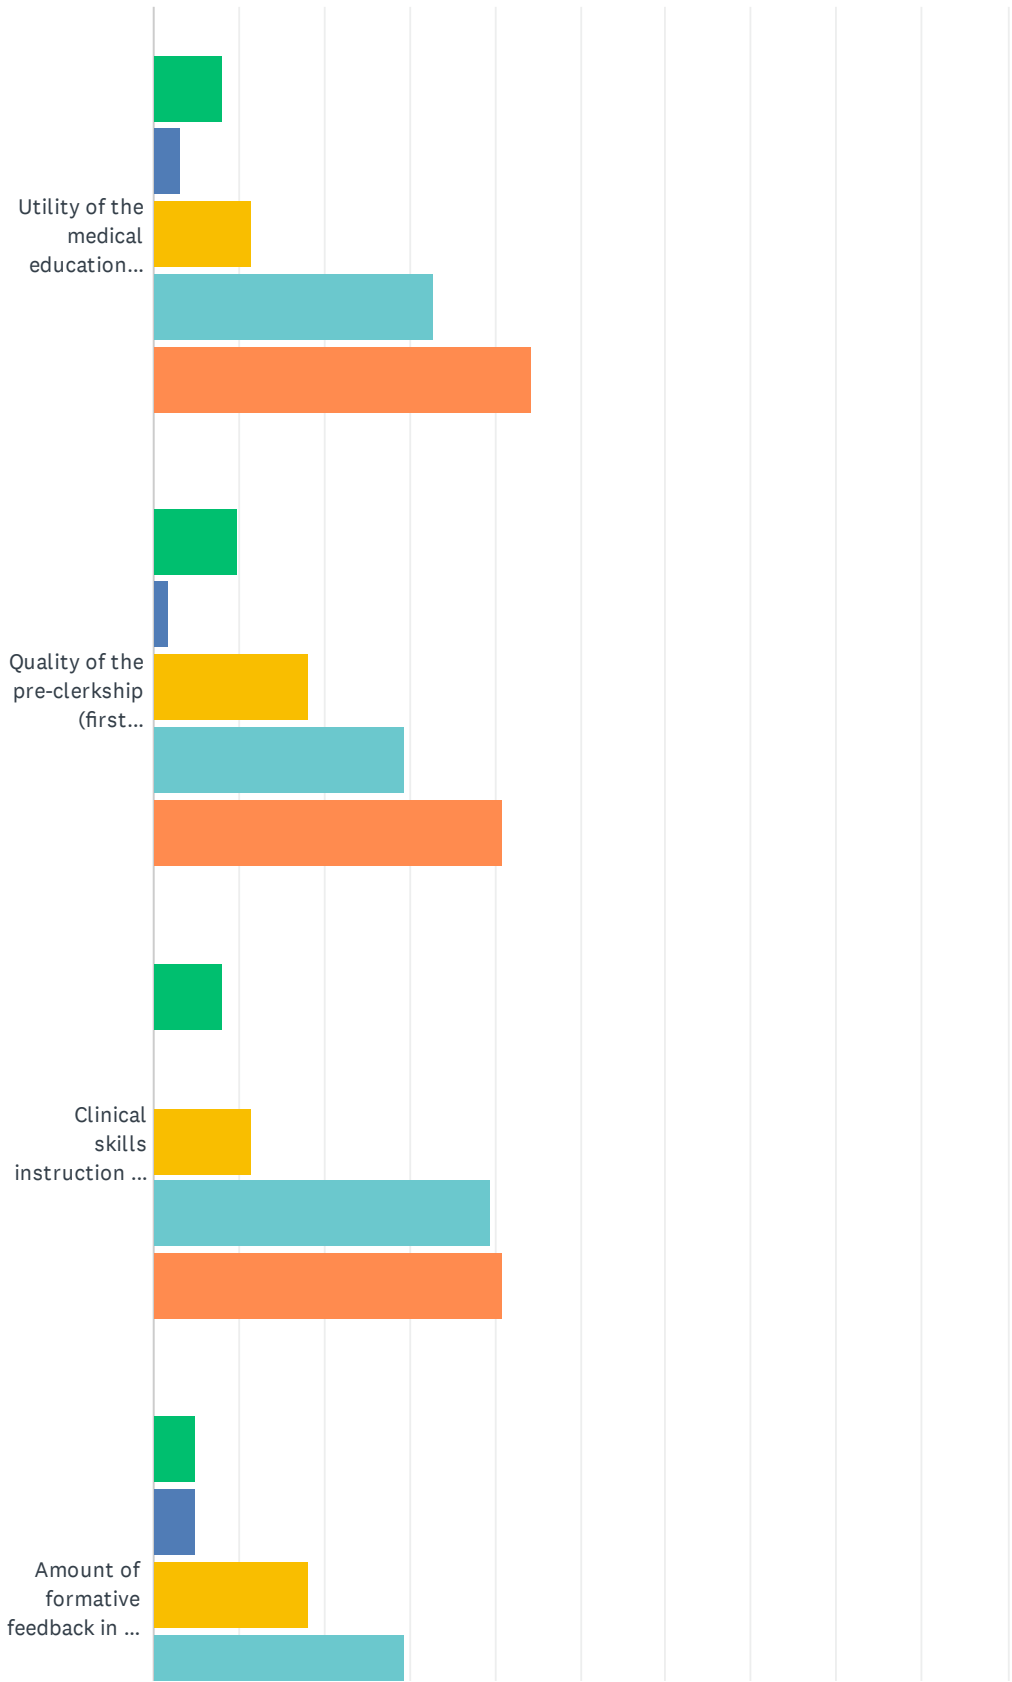

Basic Science Program - Institutional Self Study Survey 2024

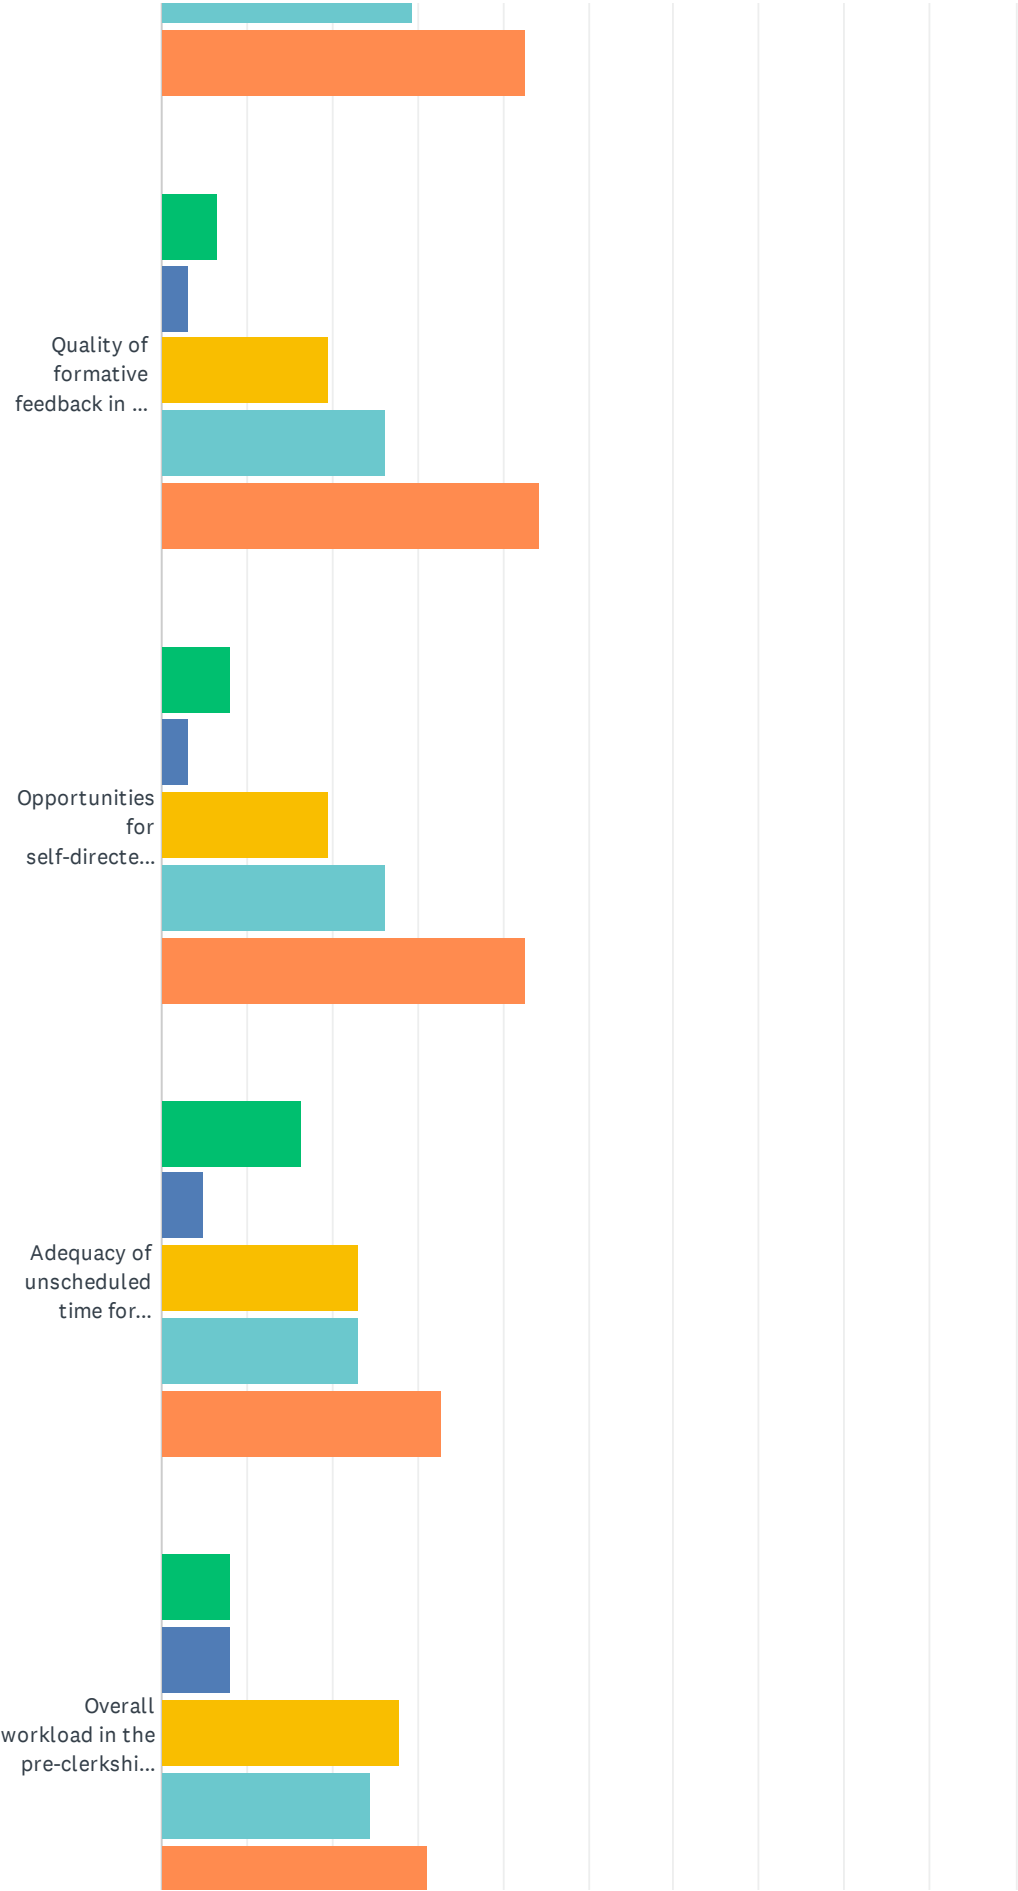

Basic Science Program - Institutional Self Study Survey 2024

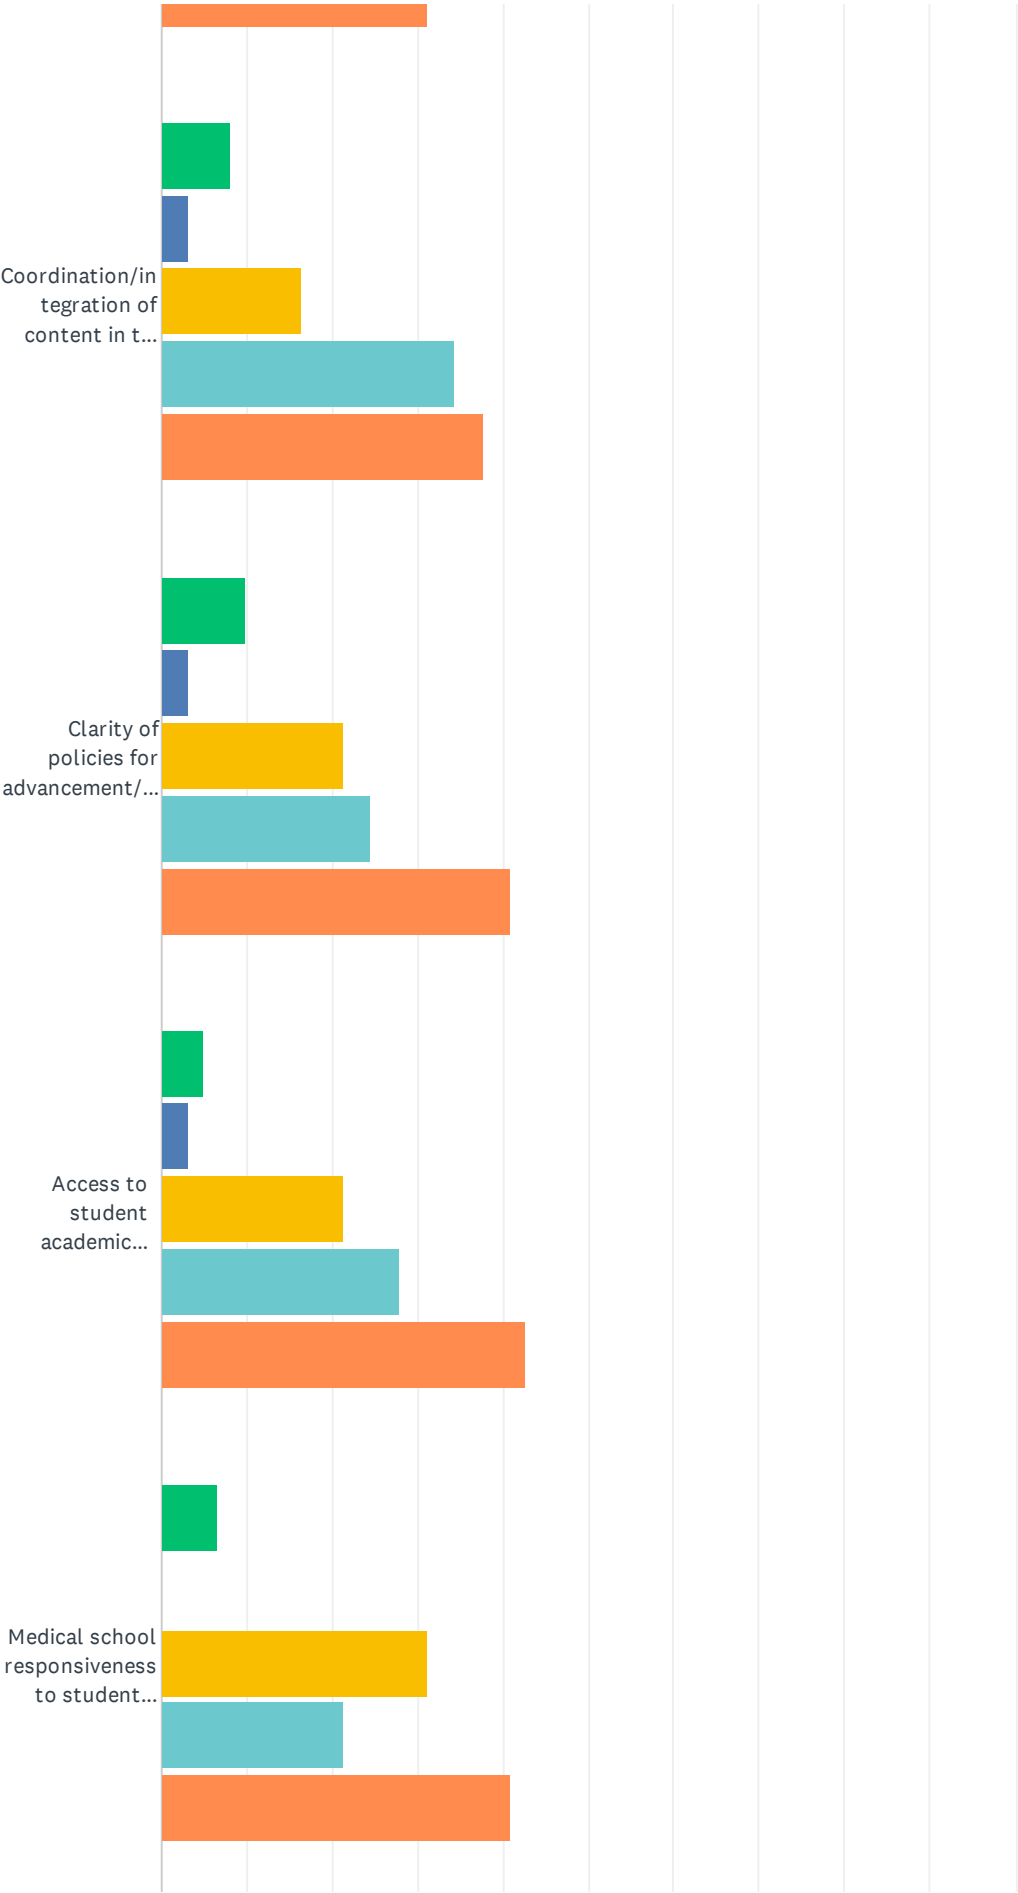



Basic Science Program - Institutional Self Study Survey 2024

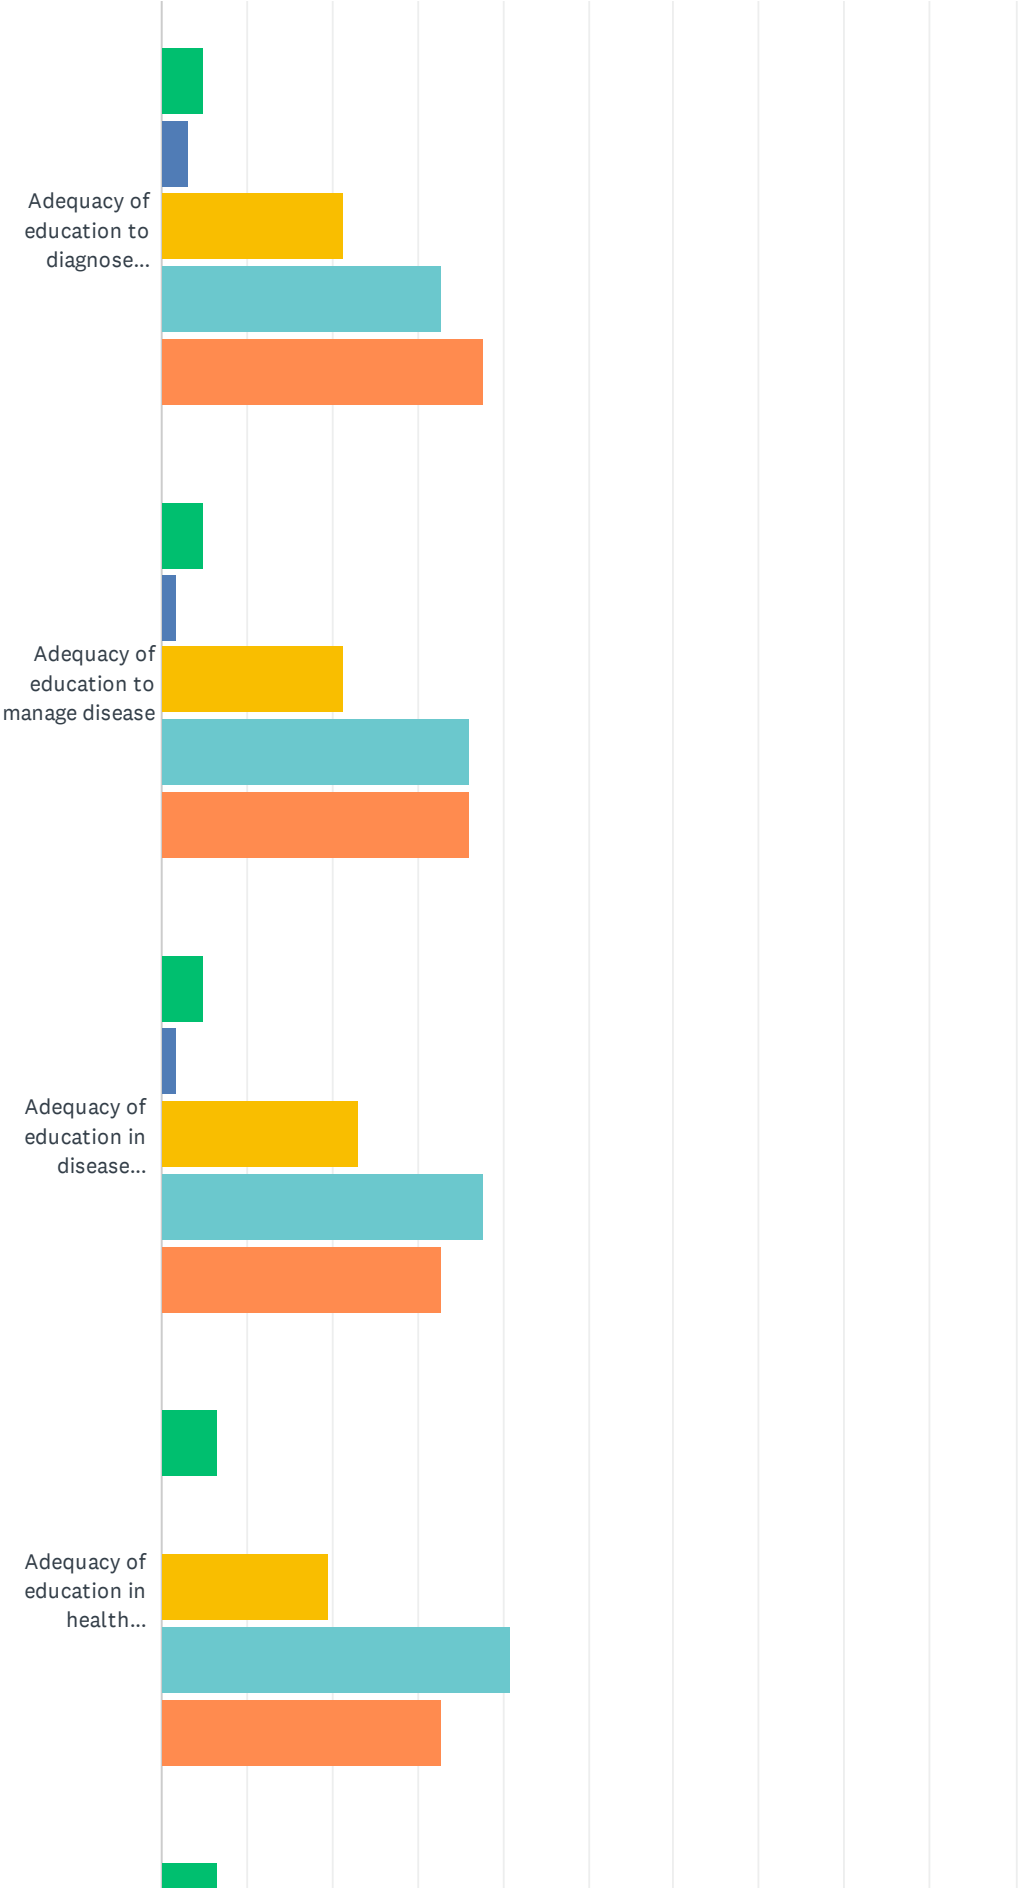

Basic Science Program - Institutional Self Study Survey 2024

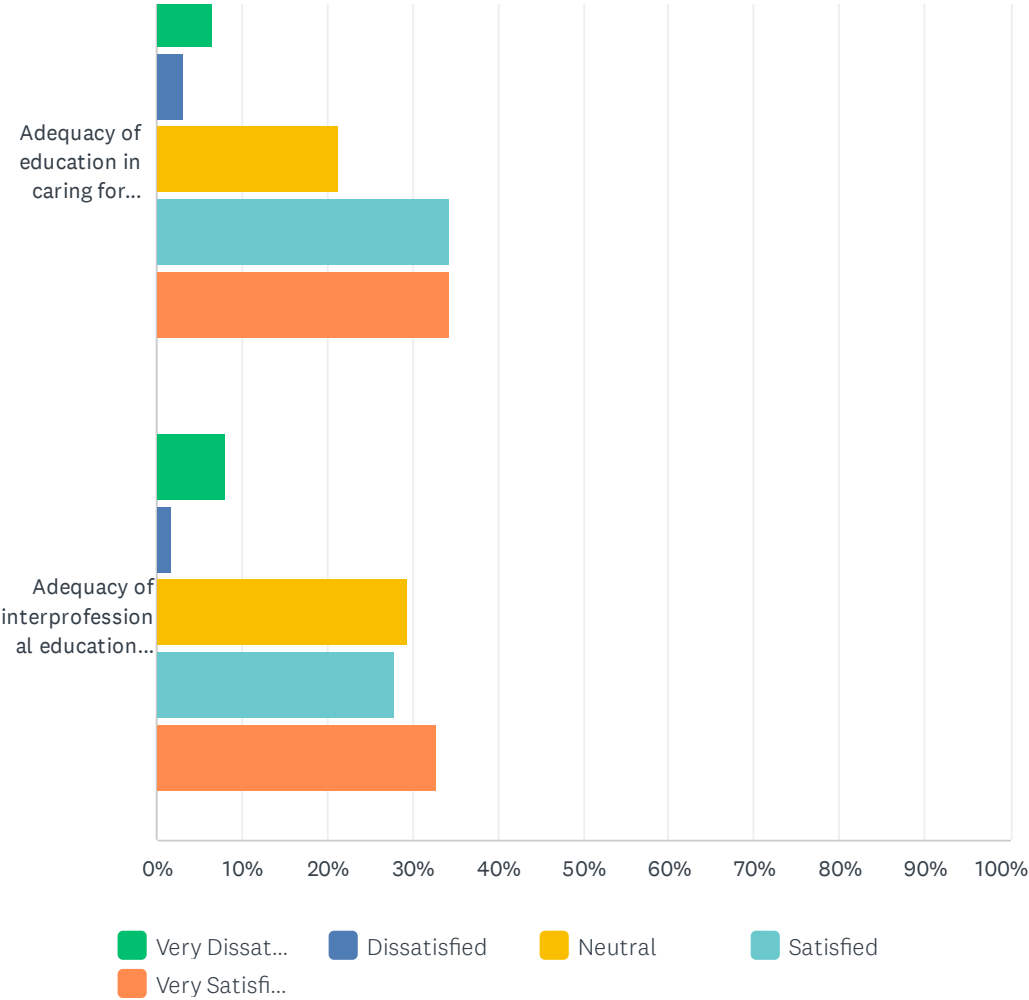

# Basic Science Program - Institutional Self Study Survey 2024

|                                                                                    | VERY DISSATISFIED | DISSATISFIED | NEUTRAL      | SATISFIED    | VERY SATISFIED | TOTAL | WEIGHTED AVERAGE |
|------------------------------------------------------------------------------------|-------------------|--------------|--------------|--------------|----------------|-------|------------------|
| Utility of the medical education programme objectives to support learning          | 8.20%<br>5        | 3.28%<br>2   | 11.48%<br>7  | 32.79%<br>20 | 44.26%<br>27   | 61    | 4.02             |
| Quality of the pre-clerkship (first year/second year)                              | 9.84%<br>6        | 1.64%<br>1   | 18.03%<br>11 | 29.51%<br>18 | 40.98%<br>25   | 61    | 3.90             |
| Clinical skills instruction in the pre-clerkship (first/second year)               | 8.20%<br>5        | 0.00%<br>0   | 11.48%<br>7  | 39.34%<br>24 | 40.98%<br>25   | 61    | 4.05             |
| Amount of formative feedback in the pre-clerkship (first/second years)             | 4.92%<br>3        | 4.92%<br>3   | 18.03%<br>11 | 29.51%<br>18 | 42.62%<br>26   | 61    | 4.00             |
| Quality of formative feedback in the pre-clerkship (first/second years)            | 6.56%<br>4        | 3.28%<br>2   | 19.67%<br>12 | 26.23%<br>16 | 44.26%<br>27   | 61    | 3.98             |
| Opportunities for self-directed learning in the pre-clerkship (first/second years) | 8.20%<br>5        | 3.28%<br>2   | 19.67%<br>12 | 26.23%<br>16 | 42.62%<br>26   | 61    | 3.92             |
| Adequacy of unscheduled time for self-directed learning                            | 16.39%<br>10      | 4.92%<br>3   | 22.95%<br>14 | 22.95%<br>14 | 32.79%<br>20   | 61    | 3.51             |
| Overall workload in the pre-clerkship (first/second years)                         | 8.20%<br>5        | 8.20%<br>5   | 27.87%<br>17 | 24.59%<br>15 | 31.15%<br>19   | 61    | 3.62             |
| Coordination/integration of content in the pre clerkship (first/second years)      | 8.20%<br>5        | 3.28%<br>2   | 16.39%<br>10 | 34.43%<br>21 | 37.70%<br>23   | 61    | 3.90             |
| Clarity of policies for advancement/graduation                                     | 9.84%<br>6        | 3.28%<br>2   | 21.31%<br>13 | 24.59%<br>15 | 40.98%<br>25   | 61    | 3.84             |
| Access to student academic records                                                 | 4.92%<br>3        | 3.28%<br>2   | 21.31%<br>13 | 27.87%<br>17 | 42.62%<br>26   | 61    | 4.00             |
| Medical school responsiveness to student feedback on courses/clerkships            | 6.56%<br>4        | 0.00%<br>0   | 31.15%<br>19 | 21.31%<br>13 | 40.98%<br>25   | 61    | 3.90             |
| Adequacy of education to diagnose disease                                          | 4.92%<br>3        | 3.28%<br>2   | 21.31%<br>13 | 32.79%<br>20 | 37.70%<br>23   | 61    | 3.95             |
| Adequacy of education to manage disease                                            | 4.92%<br>3        | 1.64%<br>1   | 21.31%<br>13 | 36.07%<br>22 | 36.07%<br>22   | 61    | 3.97             |
| Adequacy of education in disease prevention                                        | 4.92%<br>3        | 1.64%<br>1   | 22.95%<br>14 | 37.70%<br>23 | 32.79%<br>20   | 61    | 3.92             |
| Adequacy of education in health maintenance                                        | 6.56%<br>4        | 0.00%<br>0   | 19.67%<br>12 | 40.98%<br>25 | 32.79%<br>20   | 61    | 3.93             |
| Adequacy of education in caring for patients from different backgrounds            | 6.56%<br>4        | 3.28%<br>2   | 21.31%<br>13 | 34.43%<br>21 | 34.43%<br>21   | 61    | 3.87             |
| Adequacy of                                                                        | 8.20%             | 1.64%        | 29.51%       | 27.87%       | 32.79%         |       |                  |

Basic Science Program - Institutional Self Study Survey 2024

|                                         |   |   |    |    |    |    |      |
|-----------------------------------------|---|---|----|----|----|----|------|
| interprofessional education experiences | 5 | 1 | 18 | 17 | 20 | 61 | 3.75 |
|-----------------------------------------|---|---|----|----|----|----|------|

# Q1 Dean's Office

Answered: 85    Skipped: 0

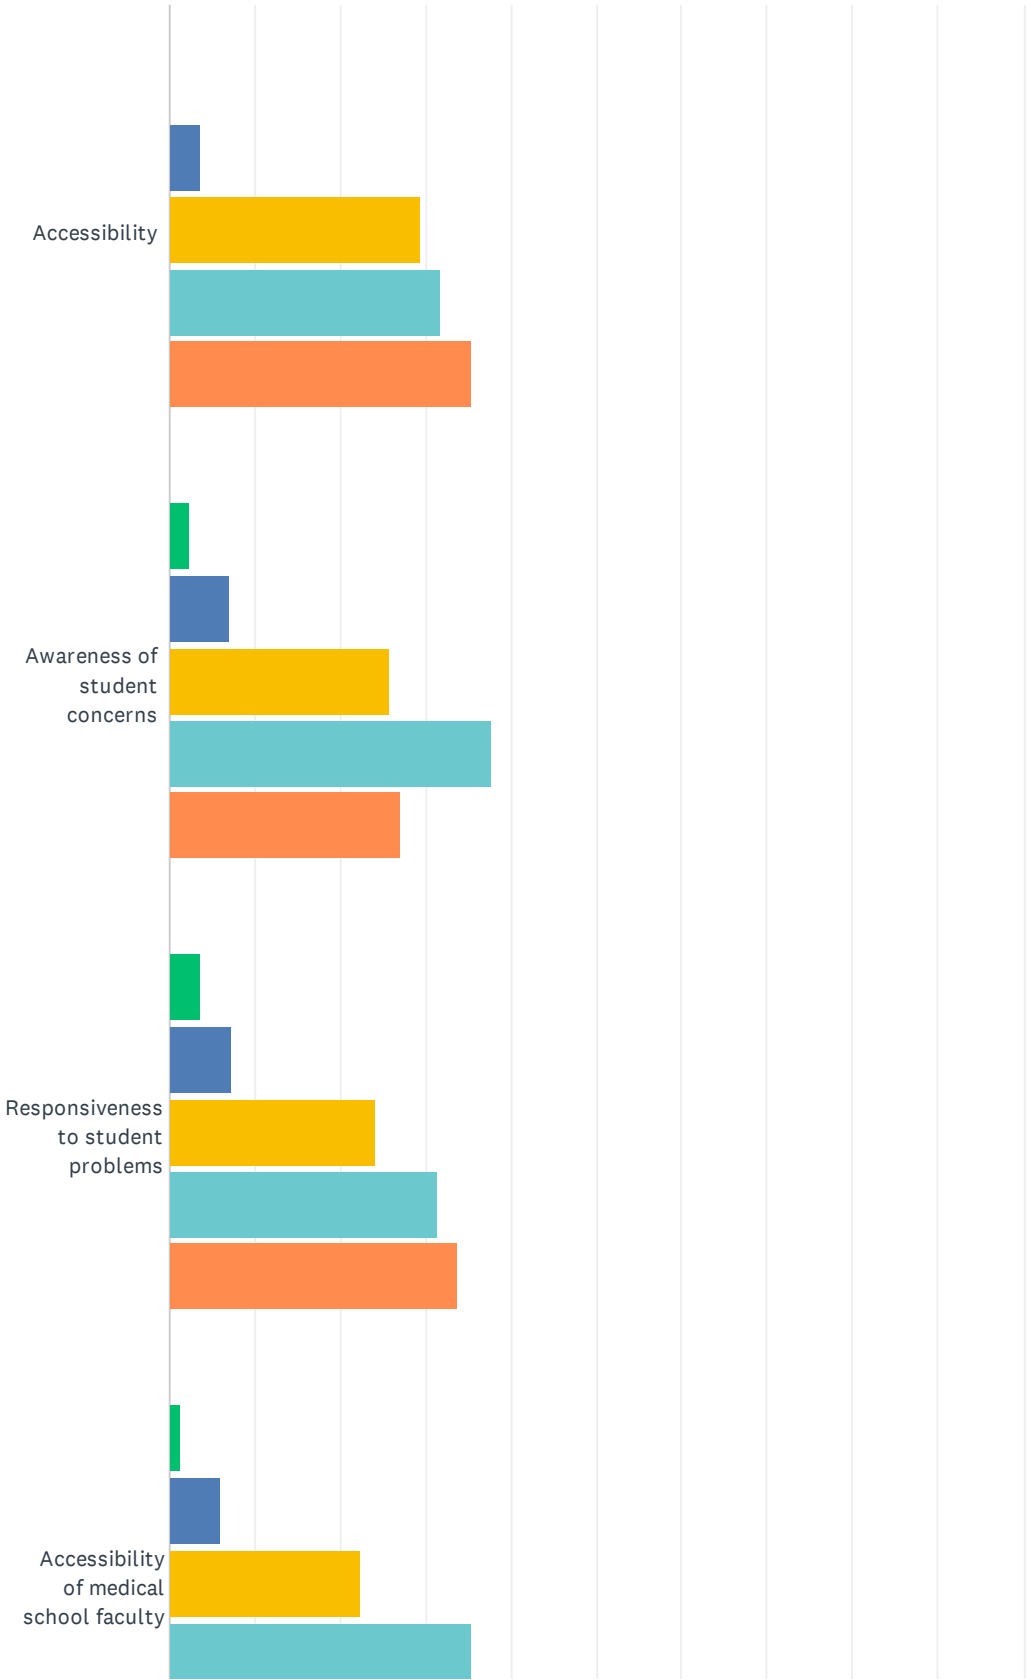

## Clinical Science Program - Institutional Self Study Survey 2024

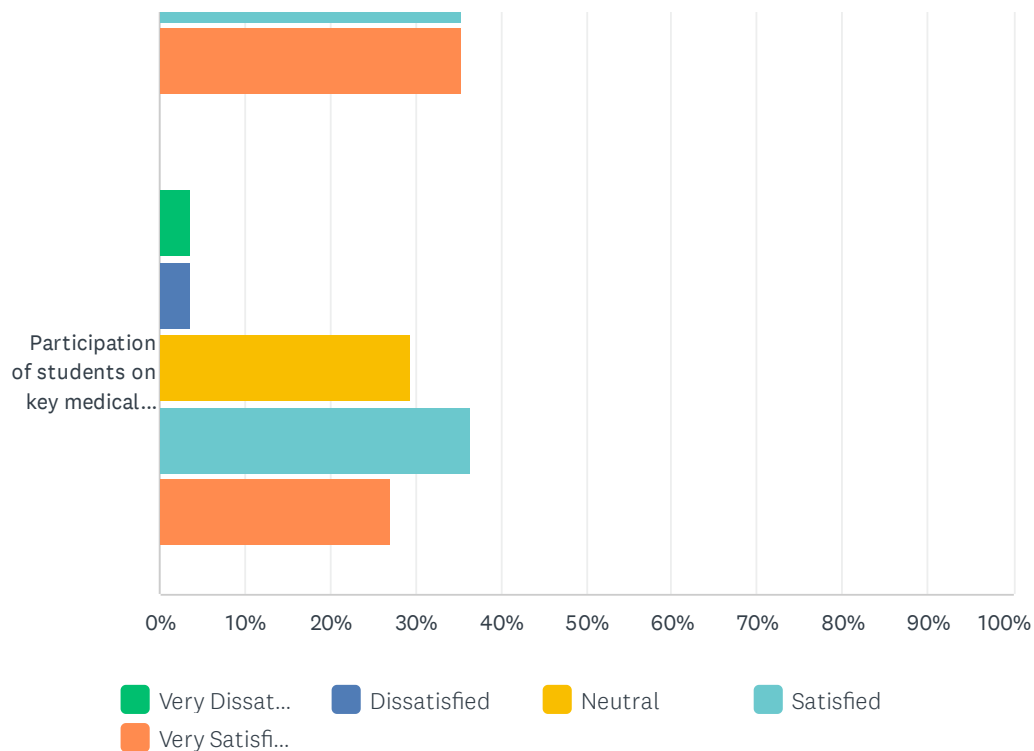

|                                                            | VERY DISSATISFIED | DISSATISFIED | NEUTRAL      | SATISFIED    | VERY SATISFIED | TOTAL | WEIGHTED AVERAGE |
|------------------------------------------------------------|-------------------|--------------|--------------|--------------|----------------|-------|------------------|
| Accessibility                                              | 0.00%<br>0        | 3.53%<br>3   | 29.41%<br>25 | 31.76%<br>27 | 35.29%<br>30   | 85    | 3.99             |
| Awareness of student concerns                              | 2.35%<br>2        | 7.06%<br>6   | 25.88%<br>22 | 37.65%<br>32 | 27.06%<br>23   | 85    | 3.80             |
| Responsiveness to student problems                         | 3.61%<br>3        | 7.23%<br>6   | 24.10%<br>20 | 31.33%<br>26 | 33.73%<br>28   | 83    | 3.84             |
| Accessibility of medical school faculty                    | 1.18%<br>1        | 5.88%<br>5   | 22.35%<br>19 | 35.29%<br>30 | 35.29%<br>30   | 85    | 3.98             |
| Participation of students on key medical school committees | 3.53%<br>3        | 3.53%<br>3   | 29.41%<br>25 | 36.47%<br>31 | 27.06%<br>23   | 85    | 3.80             |

## Q2 LEARNING ENVIRONMENT AND FACILITIES

Answered: 85    Skipped: 0

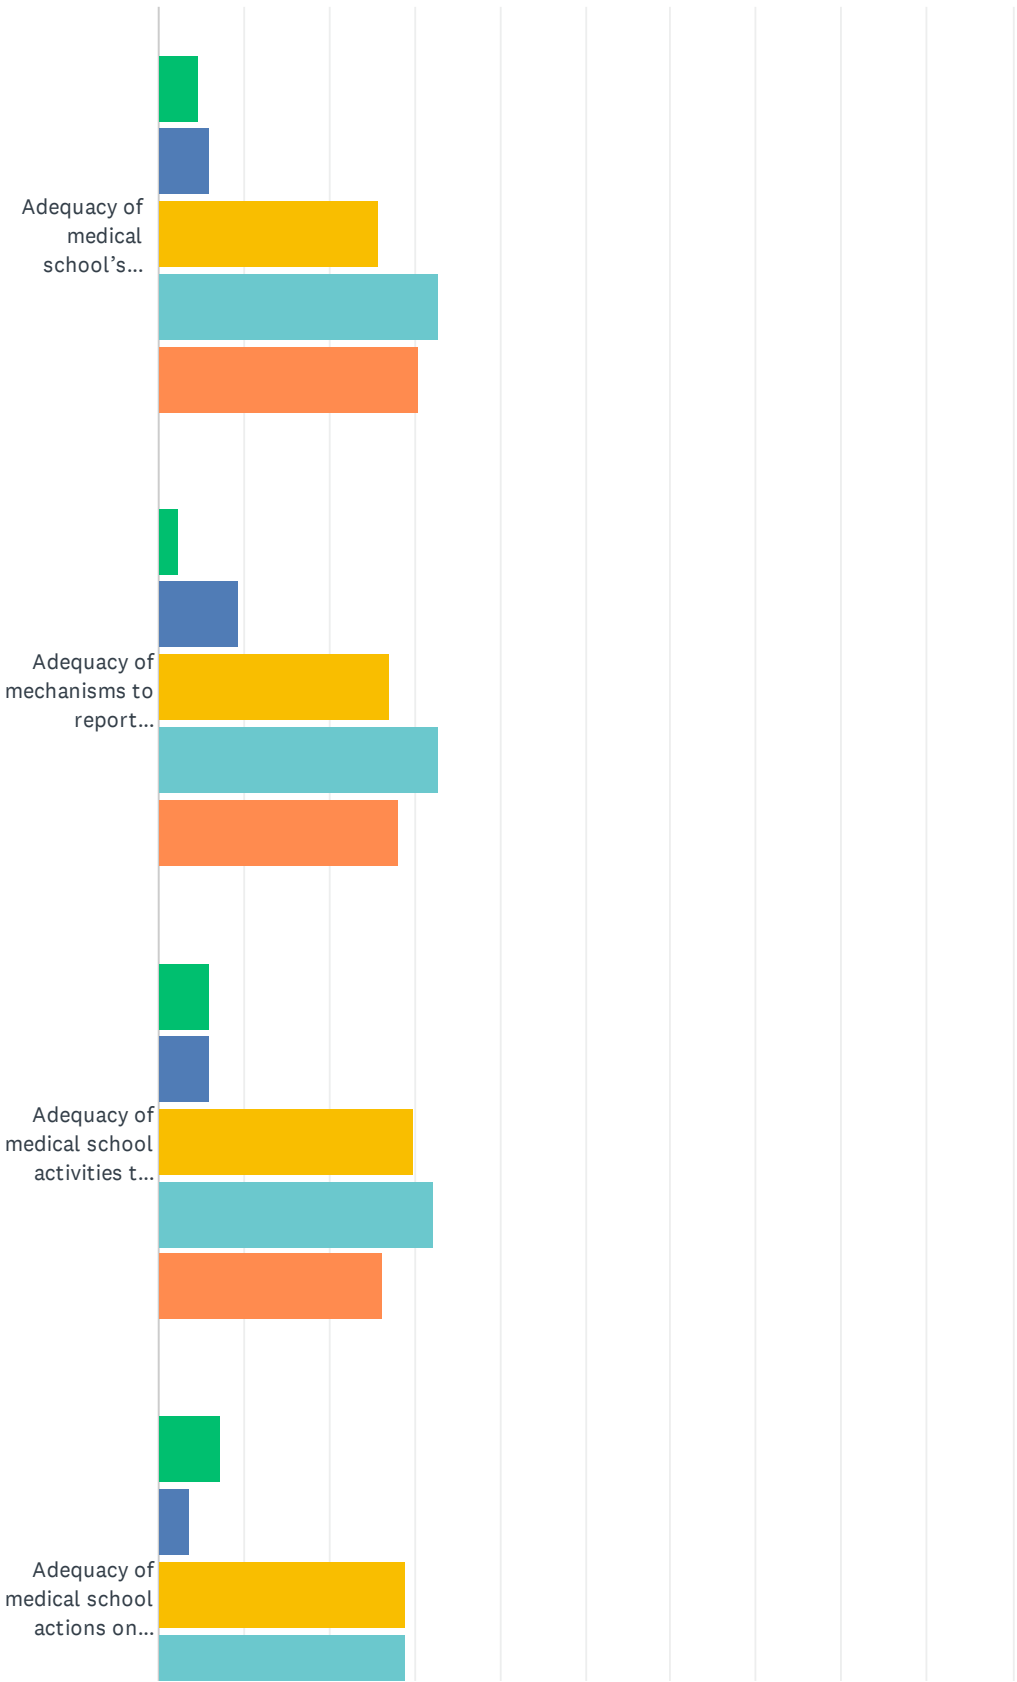

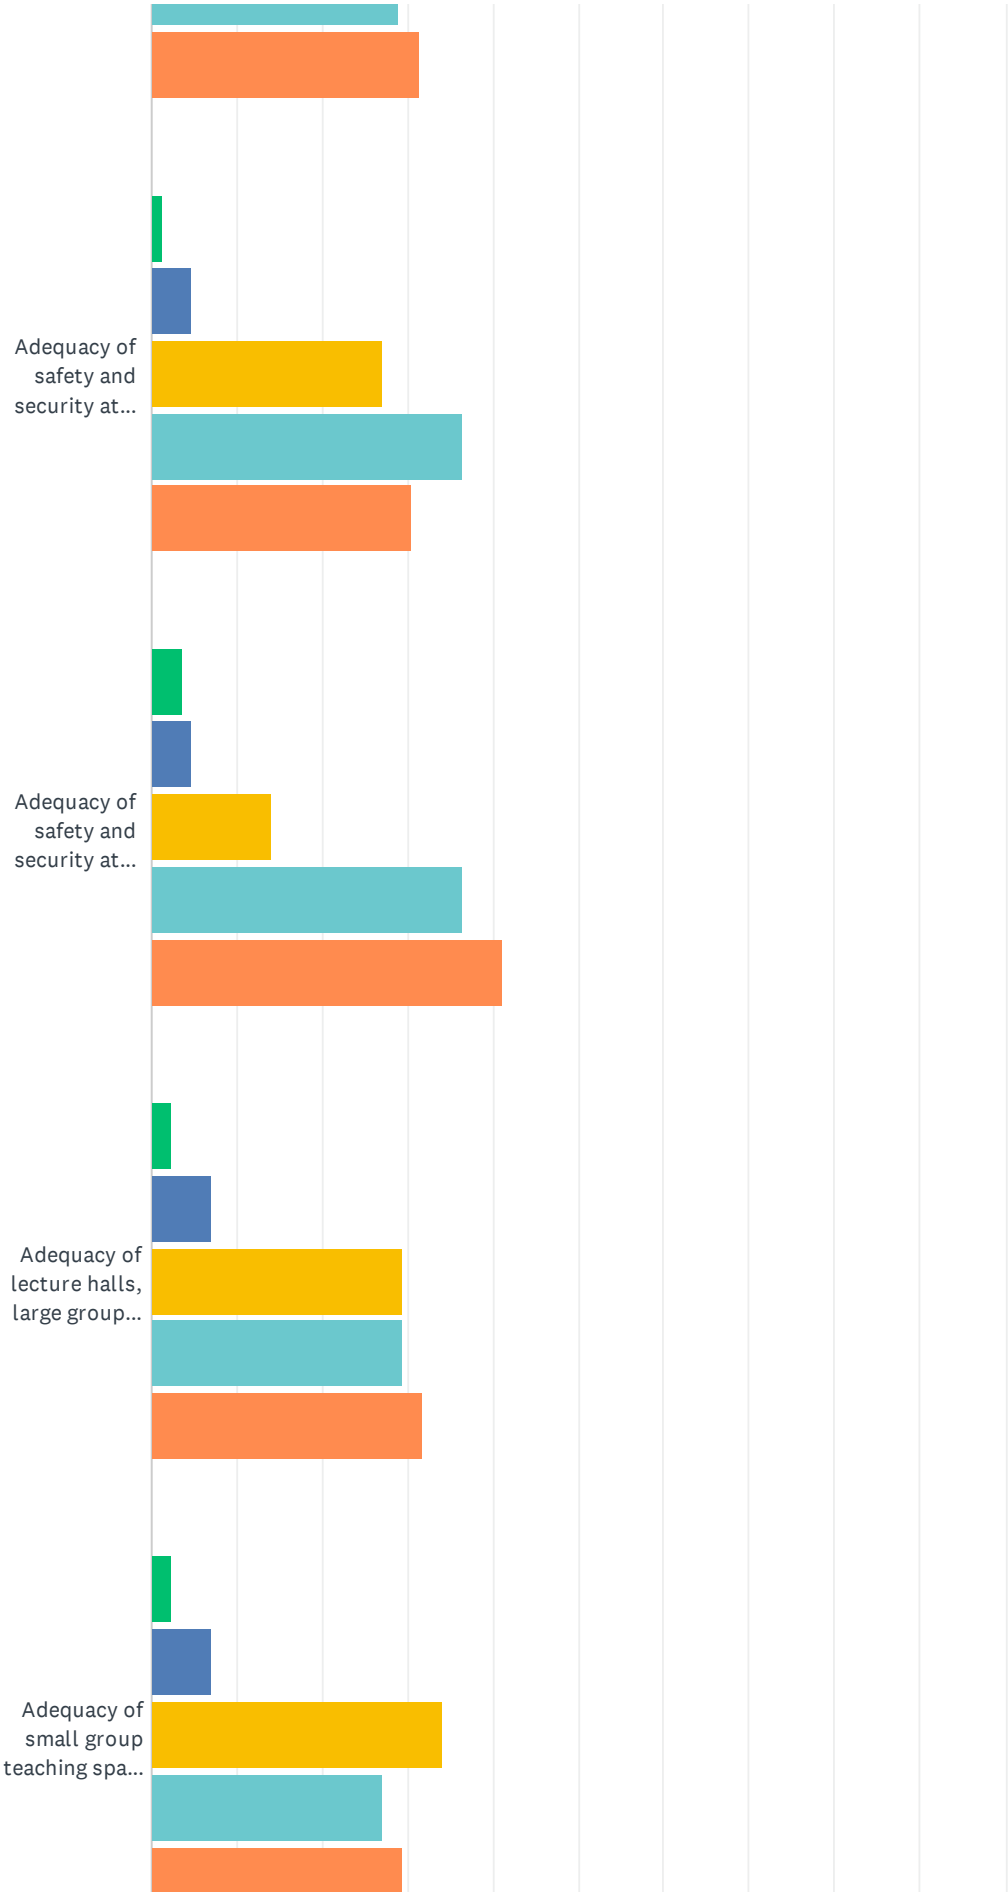



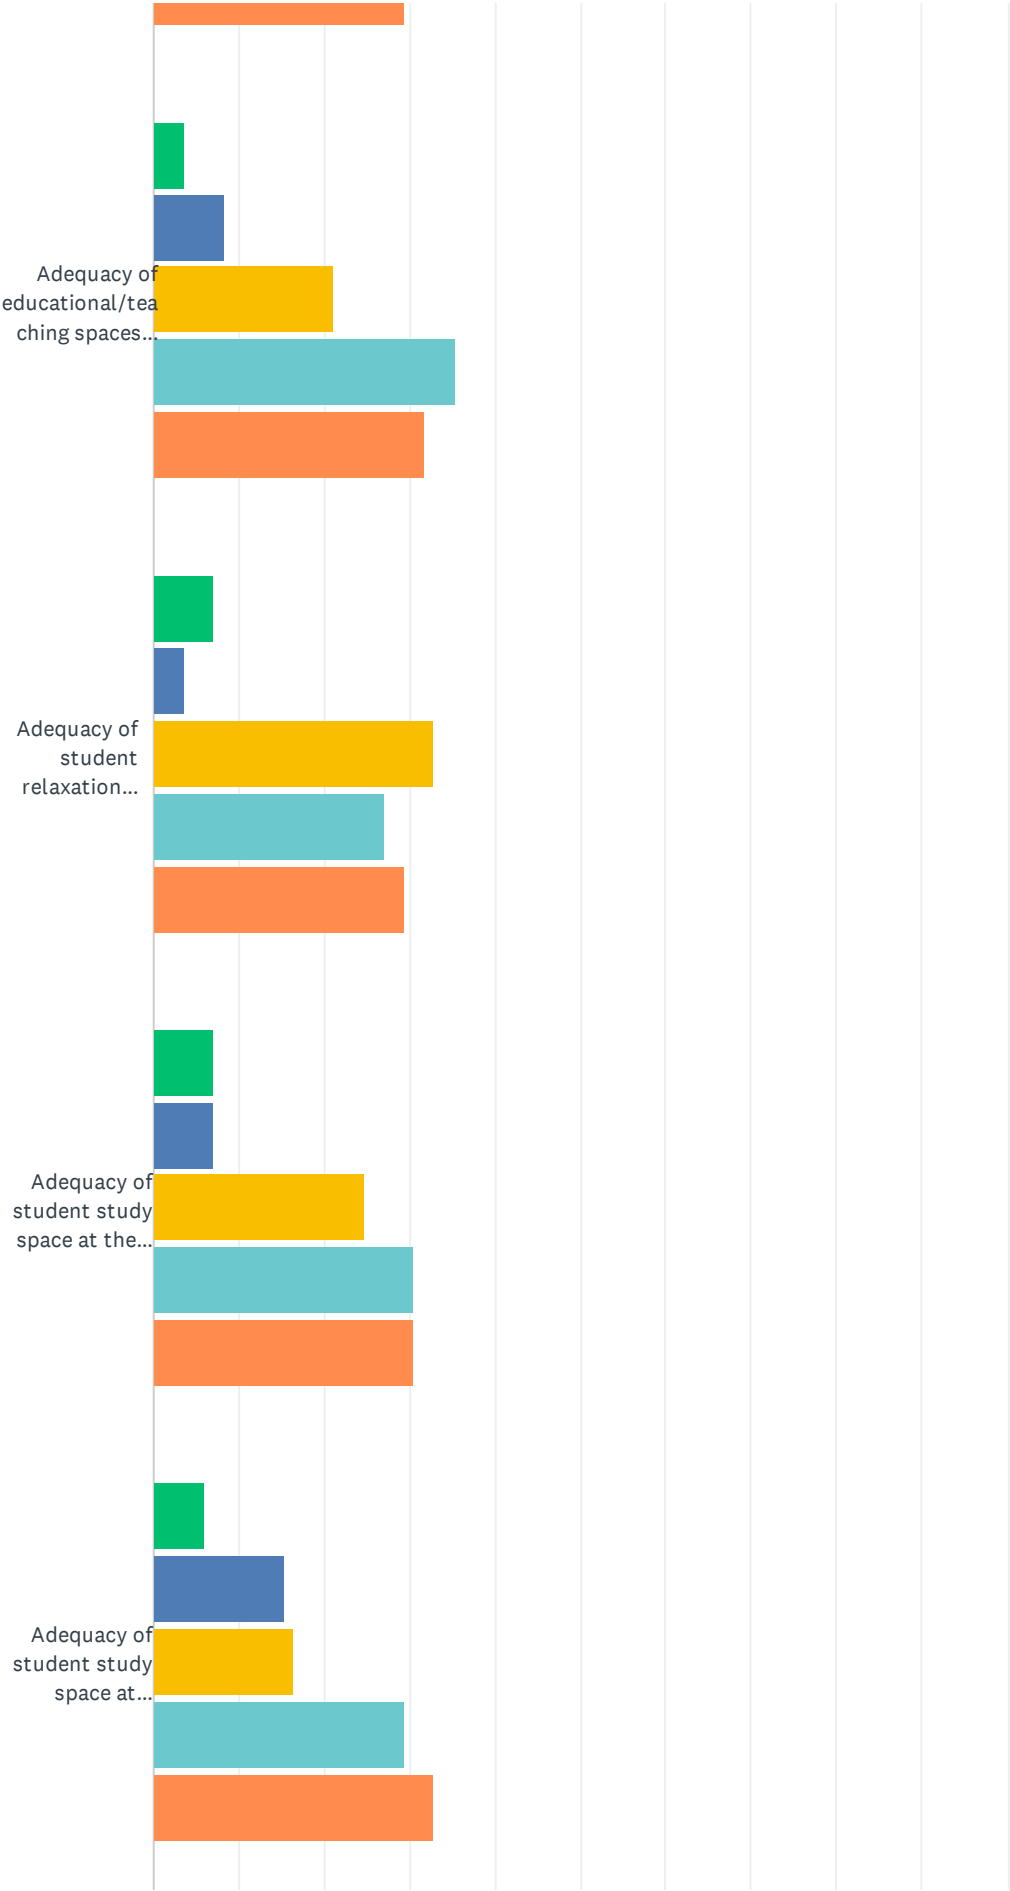

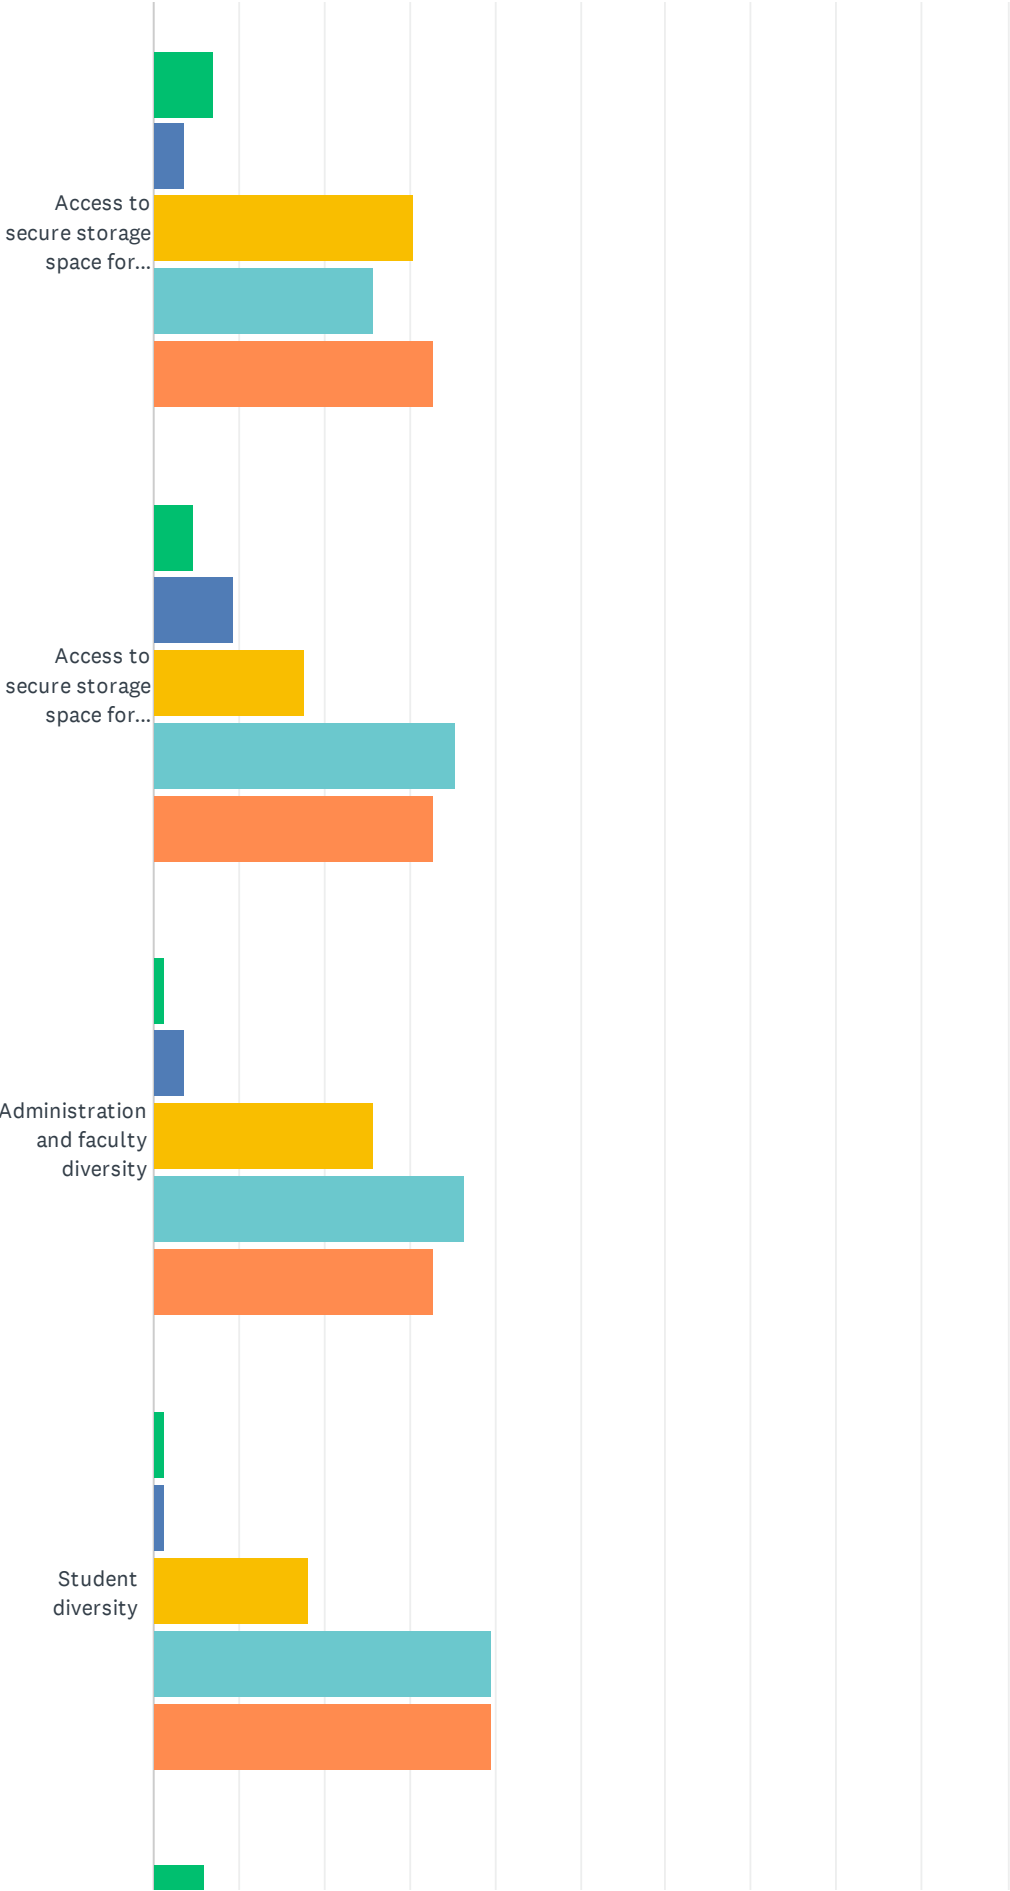

Clinical Science Program - Institutional Self Study Survey 2024

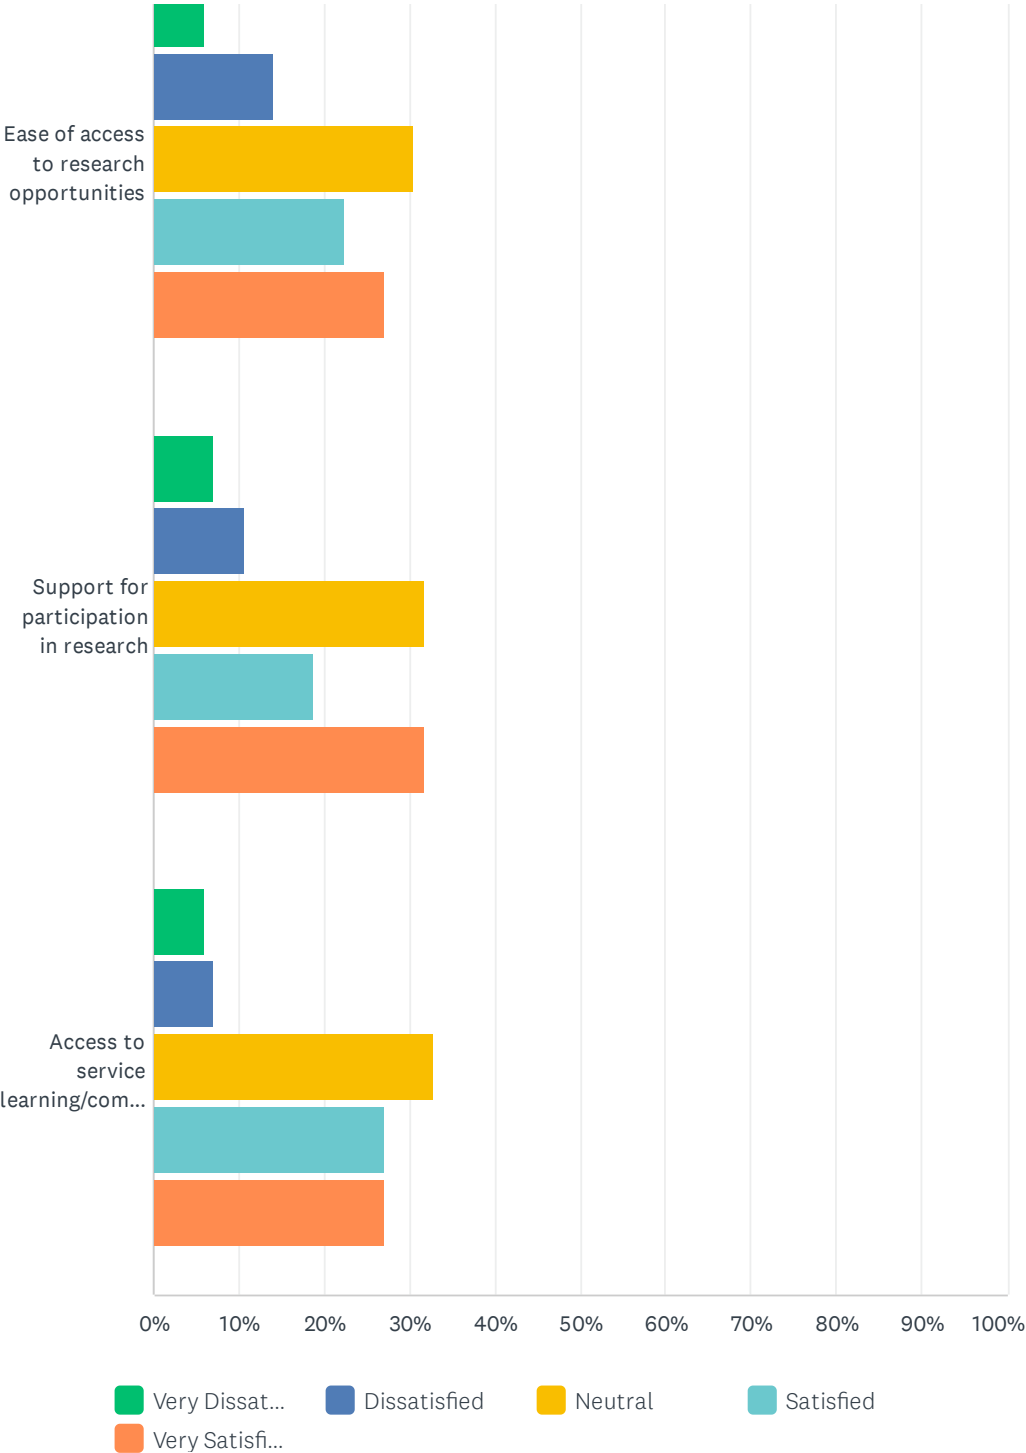

# Clinical Science Program - Institutional Self Study Survey 2024

|                                                                                       | VERY DISSATISFIED | DISSATISFIED | NEUTRAL      | SATISFIED    | VERY SATISFIED | TOTAL | WEIGHTED AVERAGE |
|---------------------------------------------------------------------------------------|-------------------|--------------|--------------|--------------|----------------|-------|------------------|
| Adequacy of medical school's student mistreatment policy                              | 4.71%<br>4        | 5.88%<br>5   | 25.88%<br>22 | 32.94%<br>28 | 30.59%<br>26   | 85    | 3.79             |
| Adequacy of mechanisms to report mistreatment                                         | 2.35%<br>2        | 9.41%<br>8   | 27.06%<br>23 | 32.94%<br>28 | 28.24%<br>24   | 85    | 3.75             |
| Adequacy of medical school activities to prevent mistreatment                         | 5.95%<br>5        | 5.95%<br>5   | 29.76%<br>25 | 32.14%<br>27 | 26.19%<br>22   | 84    | 3.67             |
| Adequacy of medical school actions on reports of mistreatment                         | 7.23%<br>6        | 3.61%<br>3   | 28.92%<br>24 | 28.92%<br>24 | 31.33%<br>26   | 83    | 3.73             |
| Adequacy of safety and security at medical school campus                              | 1.18%<br>1        | 4.71%<br>4   | 27.06%<br>23 | 36.47%<br>31 | 30.59%<br>26   | 85    | 3.91             |
| Adequacy of safety and security at clinical sites                                     | 3.53%<br>3        | 4.71%<br>4   | 14.12%<br>12 | 36.47%<br>31 | 41.18%<br>35   | 85    | 4.07             |
| Adequacy of lecture halls, large group classroom facilities                           | 2.35%<br>2        | 7.06%<br>6   | 29.41%<br>25 | 29.41%<br>25 | 31.76%<br>27   | 85    | 3.81             |
| Adequacy of small group teaching spaces on campus                                     | 2.35%<br>2        | 7.06%<br>6   | 34.12%<br>29 | 27.06%<br>23 | 29.41%<br>25   | 85    | 3.74             |
| Adequacy of educational/teaching spaces at hospitals                                  | 3.53%<br>3        | 8.24%<br>7   | 21.18%<br>18 | 35.29%<br>30 | 31.76%<br>27   | 85    | 3.84             |
| Adequacy of student relaxation space at the medical school campus                     | 7.06%<br>6        | 3.53%<br>3   | 32.94%<br>28 | 27.06%<br>23 | 29.41%<br>25   | 85    | 3.68             |
| Adequacy of student study space at the medical school campus                          | 7.06%<br>6        | 7.06%<br>6   | 24.71%<br>21 | 30.59%<br>26 | 30.59%<br>26   | 85    | 3.71             |
| Adequacy of student study space at hospitals/clinical sites                           | 5.88%<br>5        | 15.29%<br>13 | 16.47%<br>14 | 29.41%<br>25 | 32.94%<br>28   | 85    | 3.68             |
| Access to secure storage space for personal belongings at the medical school campus   | 7.06%<br>6        | 3.53%<br>3   | 30.59%<br>26 | 25.88%<br>22 | 32.94%<br>28   | 85    | 3.74             |
| Access to secure storage space for personal belongings at the hospital/clinical sites | 4.71%<br>4        | 9.41%<br>8   | 17.65%<br>15 | 35.29%<br>30 | 32.94%<br>28   | 85    | 3.82             |
| Administration and faculty diversity                                                  | 1.18%<br>1        | 3.53%<br>3   | 25.88%<br>22 | 36.47%<br>31 | 32.94%<br>28   | 85    | 3.96             |
| Student diversity                                                                     | 1.20%<br>1        | 1.20%<br>1   | 18.07%<br>15 | 39.76%<br>33 | 39.76%<br>33   | 83    | 4.16             |
| Ease of access to research opportunities                                              | 5.88%<br>5        | 14.12%<br>12 | 30.59%<br>26 | 22.35%<br>19 | 27.06%<br>23   | 85    | 3.51             |
| Support for participation in research                                                 | 7.06%<br>6        | 10.59%<br>9  | 31.76%<br>27 | 18.82%<br>16 | 31.76%<br>27   | 85    | 3.58             |

# Clinical Science Program - Institutional Self Study Survey 2024

|                                                            |            |            |              |              |              |    |      |
|------------------------------------------------------------|------------|------------|--------------|--------------|--------------|----|------|
| Access to service learning/community service opportunities | 5.88%<br>5 | 7.06%<br>6 | 32.94%<br>28 | 27.06%<br>23 | 27.06%<br>23 | 85 | 3.62 |
|------------------------------------------------------------|------------|------------|--------------|--------------|--------------|----|------|

# Q3 LIBRARY AND INFORMATION RESOURCES

Answered: 84    Skipped: 1

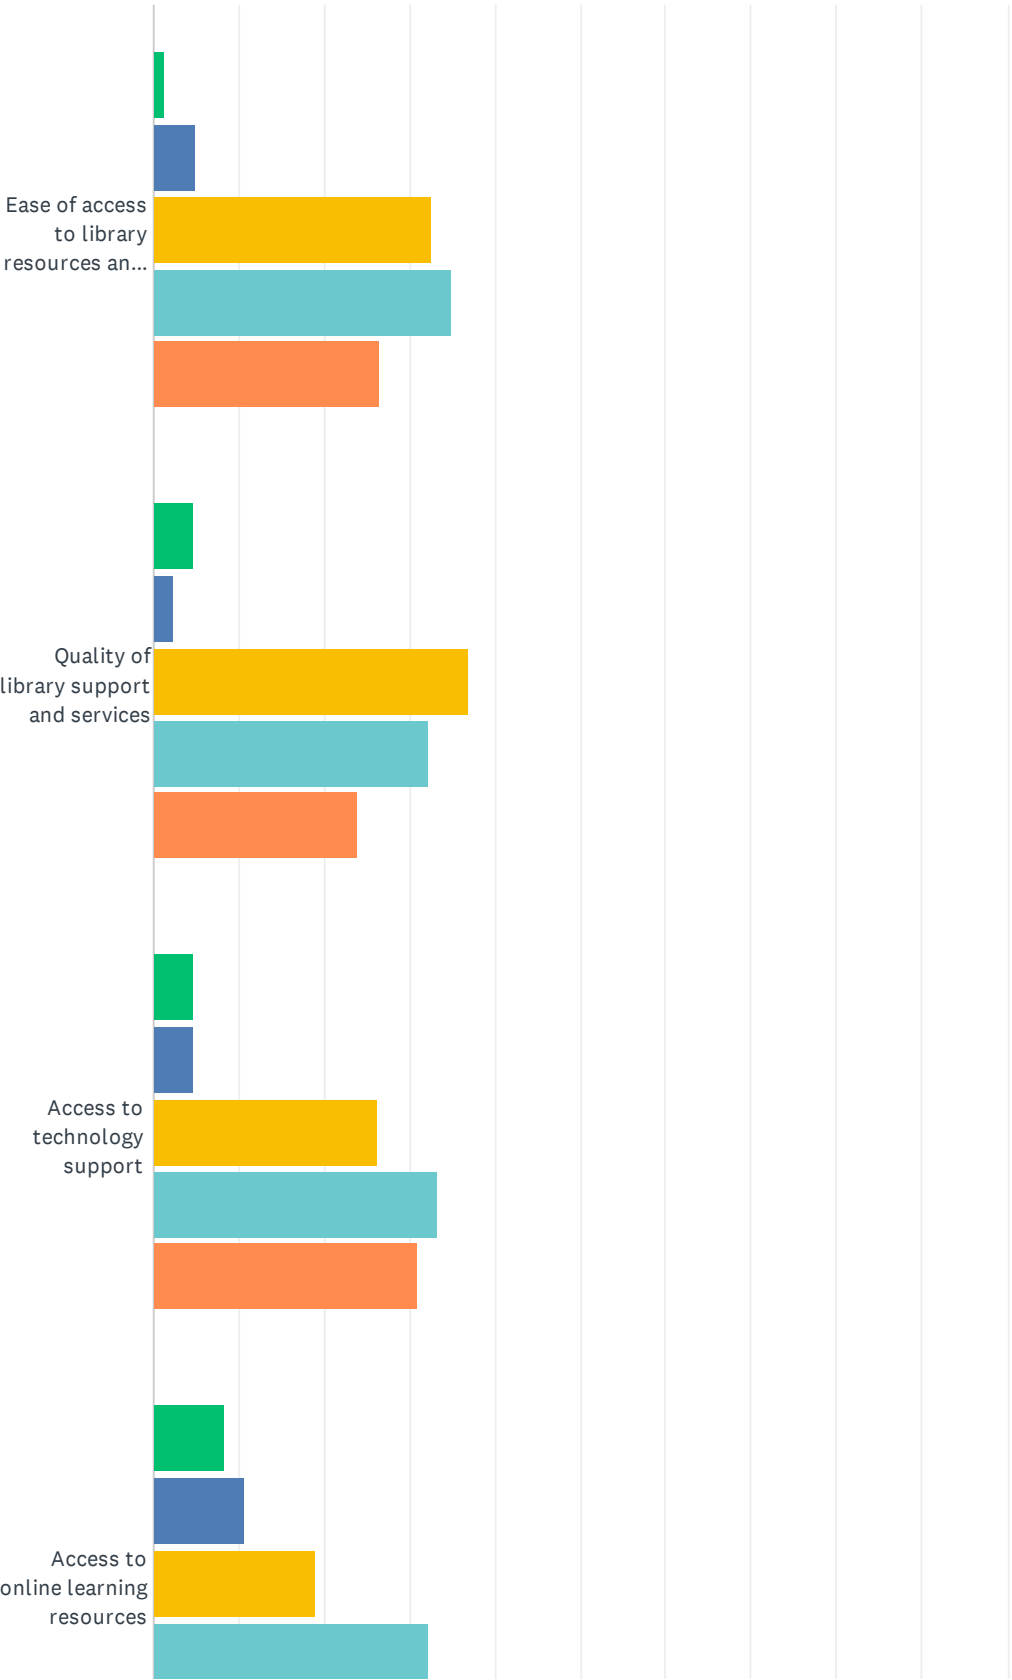

## Clinical Science Program - Institutional Self Study Survey 2024

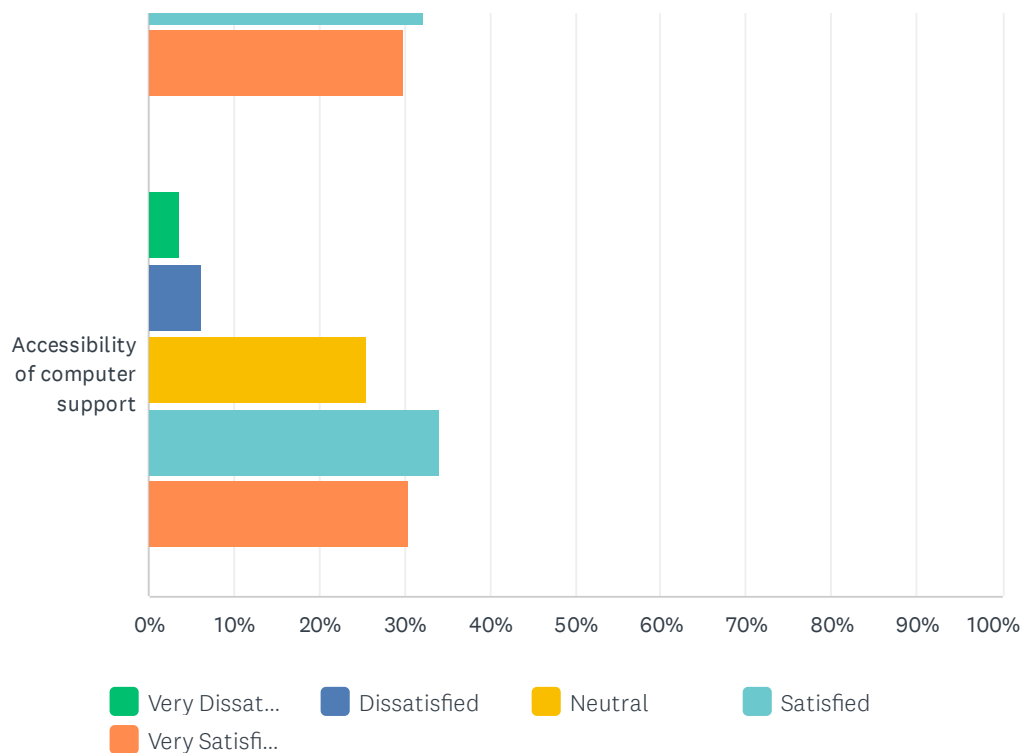

|                                                  | VERY DISSATISFIED | DISSATISFIED | NEUTRAL      | SATISFIED    | VERY SATISFIED | TOTAL | WEIGHTED AVERAGE |
|--------------------------------------------------|-------------------|--------------|--------------|--------------|----------------|-------|------------------|
| Ease of access to library resources and holdings | 1.20%<br>1        | 4.82%<br>4   | 32.53%<br>27 | 34.94%<br>29 | 26.51%<br>22   | 83    | 3.81             |
| Quality of library support and services          | 4.76%<br>4        | 2.38%<br>2   | 36.90%<br>31 | 32.14%<br>27 | 23.81%<br>20   | 84    | 3.68             |
| Access to technology support                     | 4.76%<br>4        | 4.76%<br>4   | 26.19%<br>22 | 33.33%<br>28 | 30.95%<br>26   | 84    | 3.81             |
| Access to online learning resources              | 8.33%<br>7        | 10.71%<br>9  | 19.05%<br>16 | 32.14%<br>27 | 29.76%<br>25   | 84    | 3.64             |
| Accessibility of computer support                | 3.66%<br>3        | 6.10%<br>5   | 25.61%<br>21 | 34.15%<br>28 | 30.49%<br>25   | 82    | 3.82             |

# Q4 STUDENT SERVICES

Answered: 85    Skipped: 0

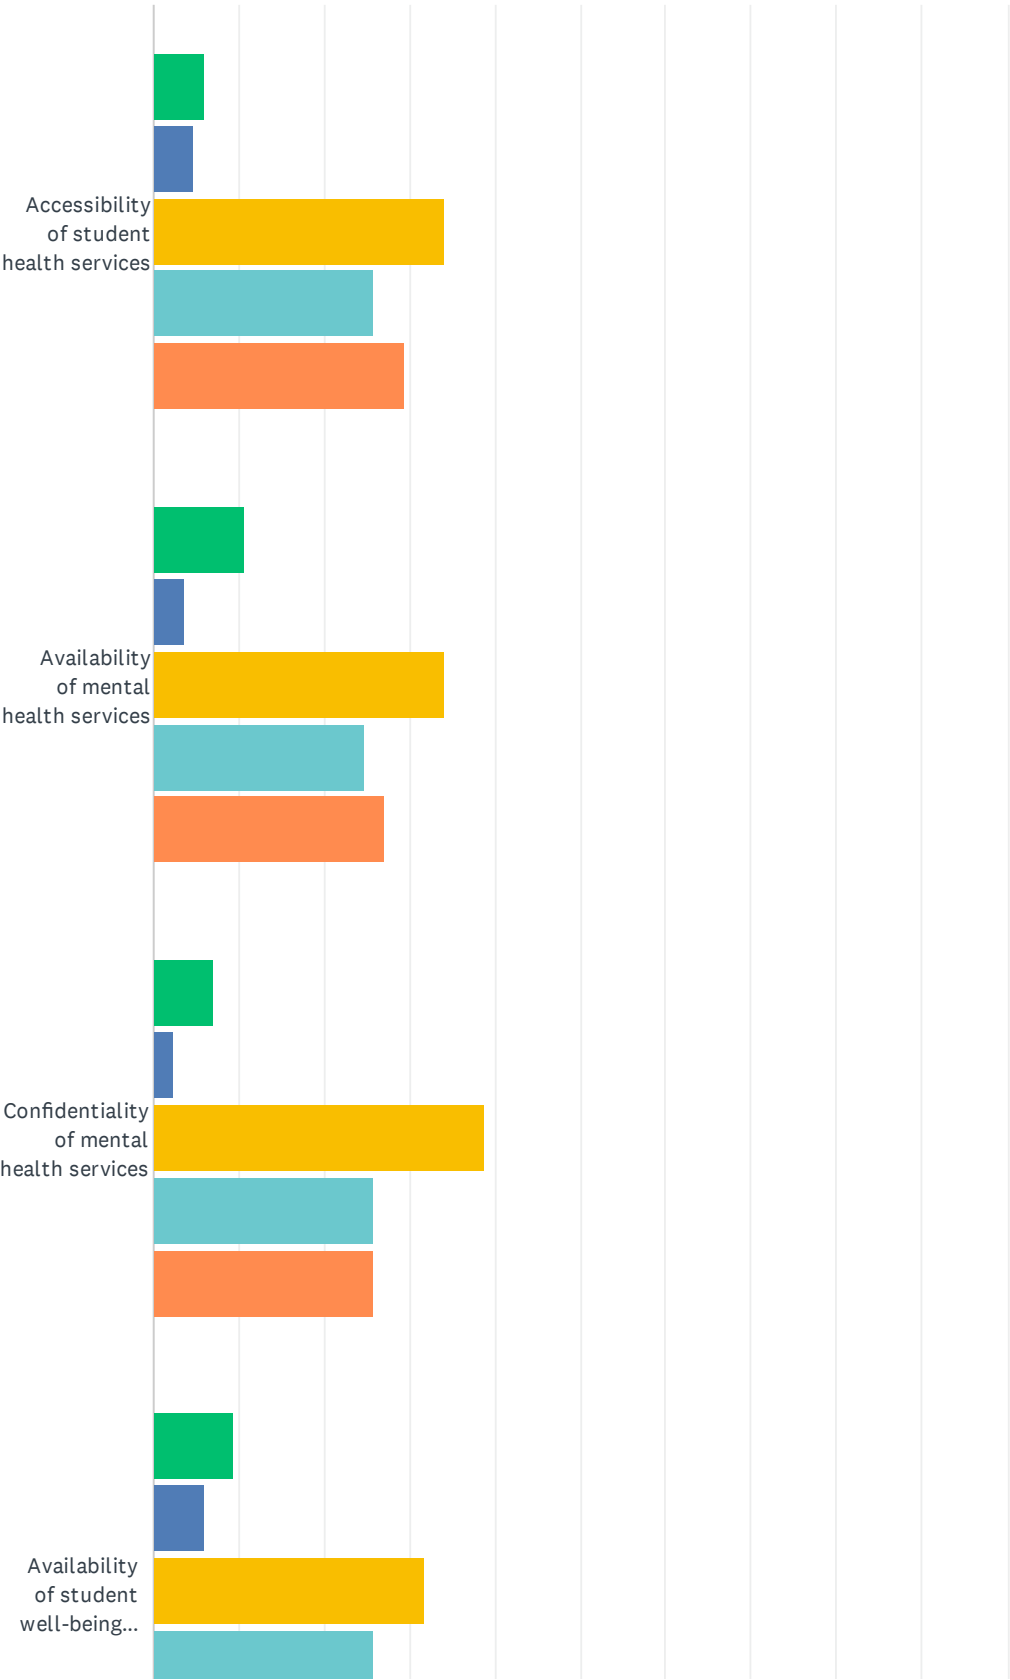



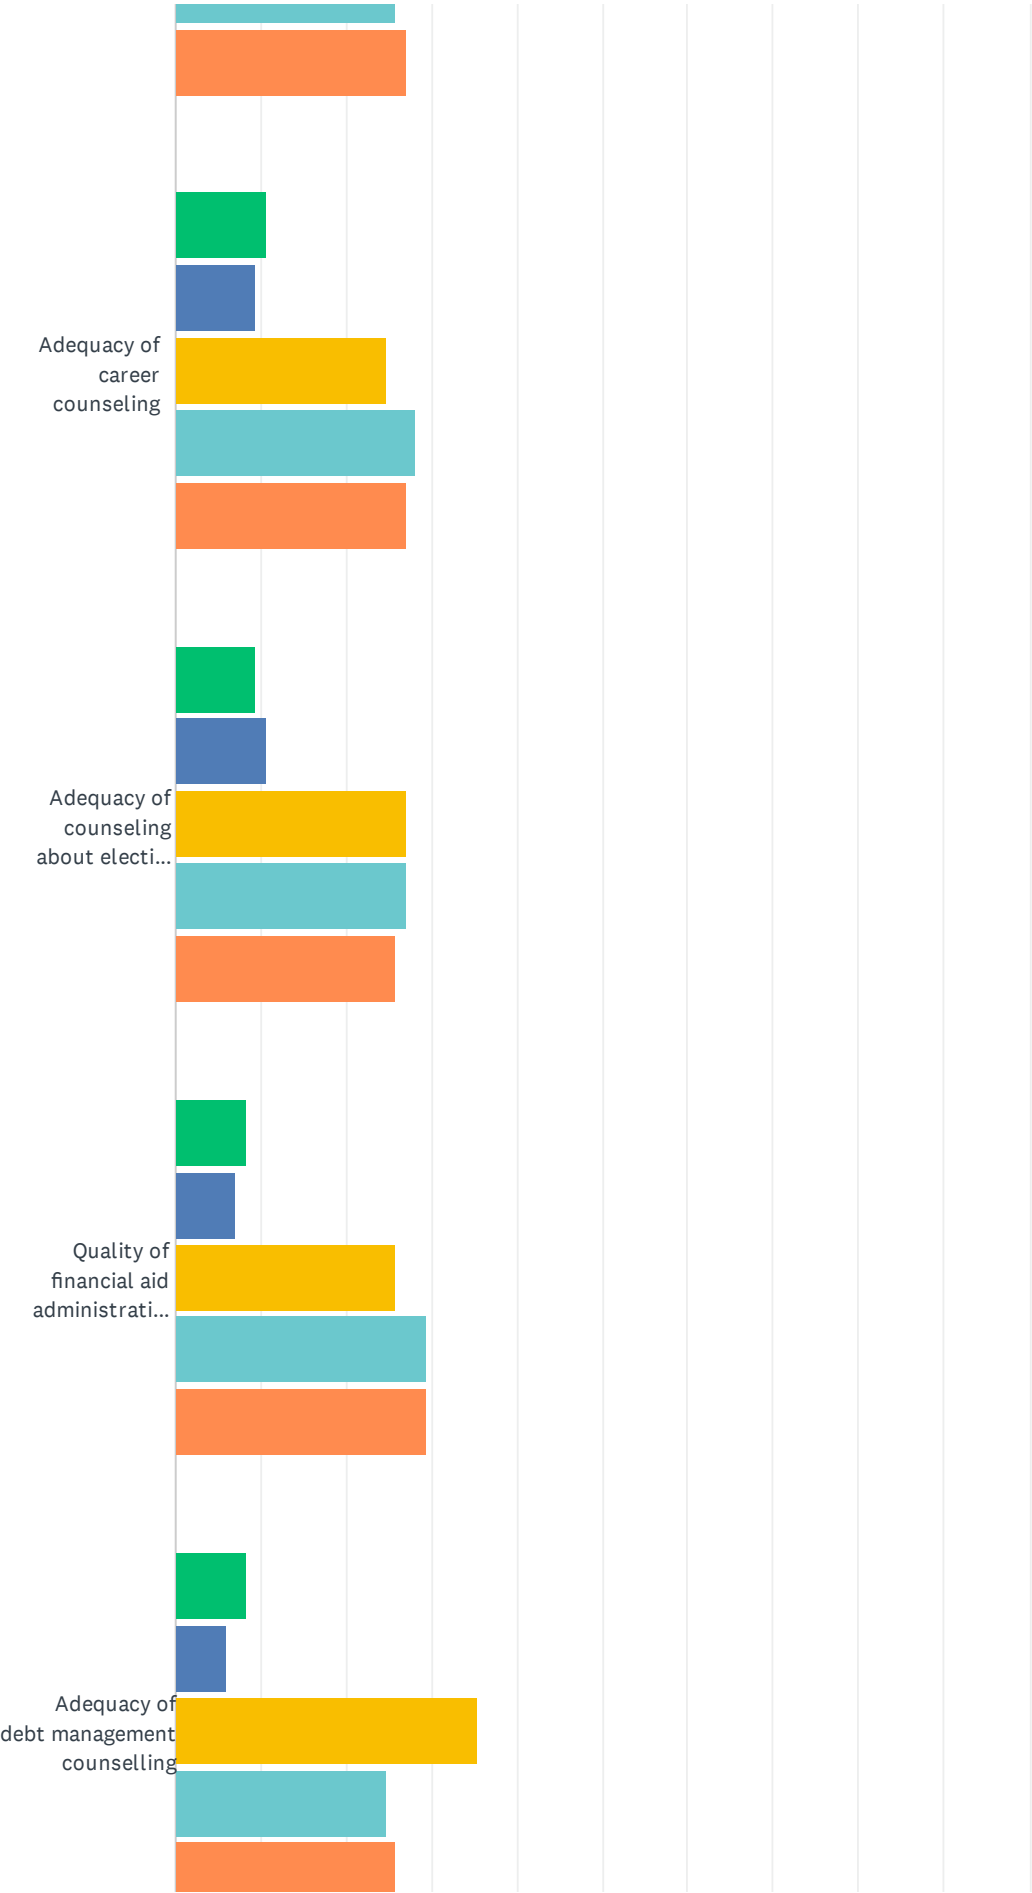

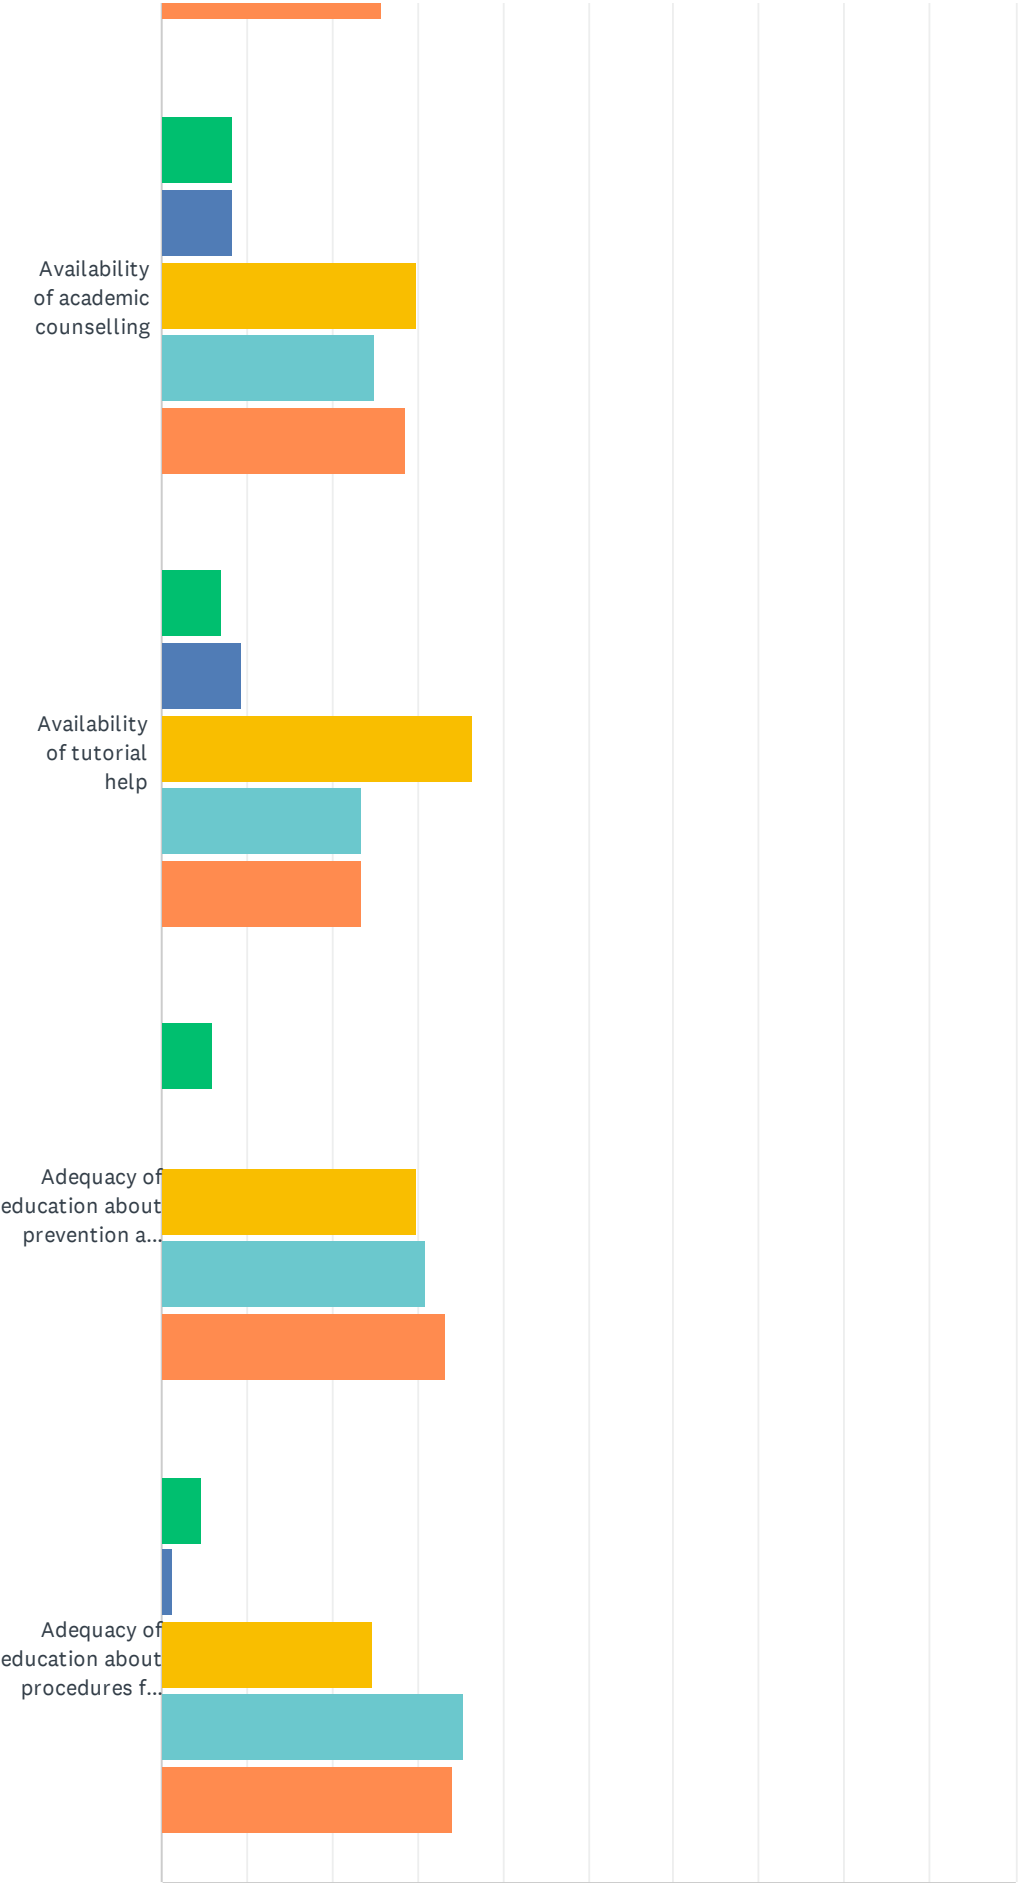

## Clinical Science Program - Institutional Self Study Survey 2024

0%    10%    20%    30%    40%    50%    60%    70%    80%    90%    100%

■ Very Dissat...    
 ■ Dissatisfied    
 ■ Neutral    
 ■ Satisfied  
■ Very Satisfi...

|                                                                                                                      | VERY DISSATISFIED | DISSATISFIED | NEUTRAL      | SATISFIED    | VERY SATISFIED | TOTAL | WEIGHTED AVERAGE |
|----------------------------------------------------------------------------------------------------------------------|-------------------|--------------|--------------|--------------|----------------|-------|------------------|
| Accessibility of student health services                                                                             | 5.88%<br>5        | 4.71%<br>4   | 34.12%<br>29 | 25.88%<br>22 | 29.41%<br>25   | 85    | 3.68             |
| Availability of mental health services                                                                               | 10.59%<br>9       | 3.53%<br>3   | 34.12%<br>29 | 24.71%<br>21 | 27.06%<br>23   | 85    | 3.54             |
| Confidentiality of mental health services                                                                            | 7.06%<br>6        | 2.35%<br>2   | 38.82%<br>33 | 25.88%<br>22 | 25.88%<br>22   | 85    | 3.61             |
| Availability of student well-being programmes                                                                        | 9.41%<br>8        | 5.88%<br>5   | 31.76%<br>27 | 25.88%<br>22 | 27.06%<br>23   | 85    | 3.55             |
| Adequacy of career counseling                                                                                        | 10.59%<br>9       | 9.41%<br>8   | 24.71%<br>21 | 28.24%<br>24 | 27.06%<br>23   | 85    | 3.52             |
| Adequacy of counseling about elective choices                                                                        | 9.41%<br>8        | 10.59%<br>9  | 27.06%<br>23 | 27.06%<br>23 | 25.88%<br>22   | 85    | 3.49             |
| Quality of financial aid administrative services                                                                     | 8.24%<br>7        | 7.06%<br>6   | 25.88%<br>22 | 29.41%<br>25 | 29.41%<br>25   | 85    | 3.65             |
| Adequacy of debt management counselling                                                                              | 8.24%<br>7        | 5.88%<br>5   | 35.29%<br>30 | 24.71%<br>21 | 25.88%<br>22   | 85    | 3.54             |
| Availability of academic counselling                                                                                 | 8.33%<br>7        | 8.33%<br>7   | 29.76%<br>25 | 25.00%<br>21 | 28.57%<br>24   | 84    | 3.57             |
| Availability of tutorial help                                                                                        | 7.06%<br>6        | 9.41%<br>8   | 36.47%<br>31 | 23.53%<br>20 | 23.53%<br>20   | 85    | 3.47             |
| Adequacy of education about prevention and exposure to infectious and environmental hazards                          | 5.95%<br>5        | 0.00%<br>0   | 29.76%<br>25 | 30.95%<br>26 | 33.33%<br>28   | 84    | 3.86             |
| Adequacy of education about procedures for care and treatment after exposure to infectious and environmental hazards | 4.71%<br>4        | 1.18%<br>1   | 24.71%<br>21 | 35.29%<br>30 | 34.12%<br>29   | 85    | 3.93             |

Q5 MEDICAL EDUCATION PROGRAMME

Answered: 85    Skipped: 0

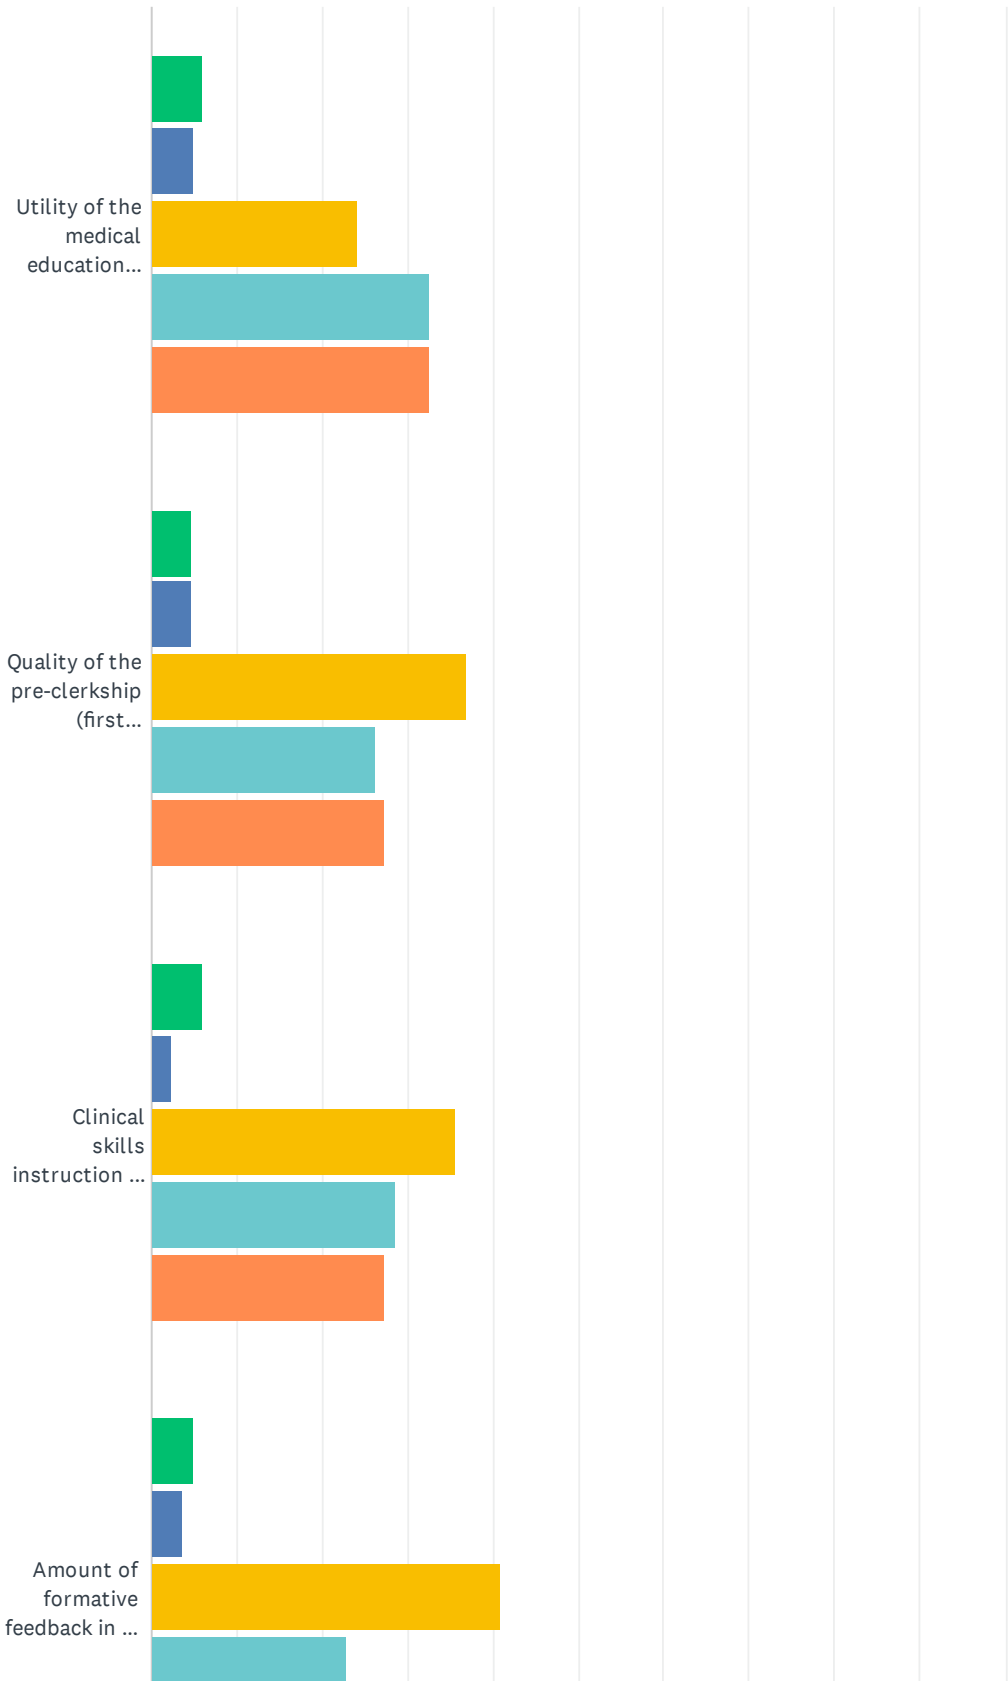

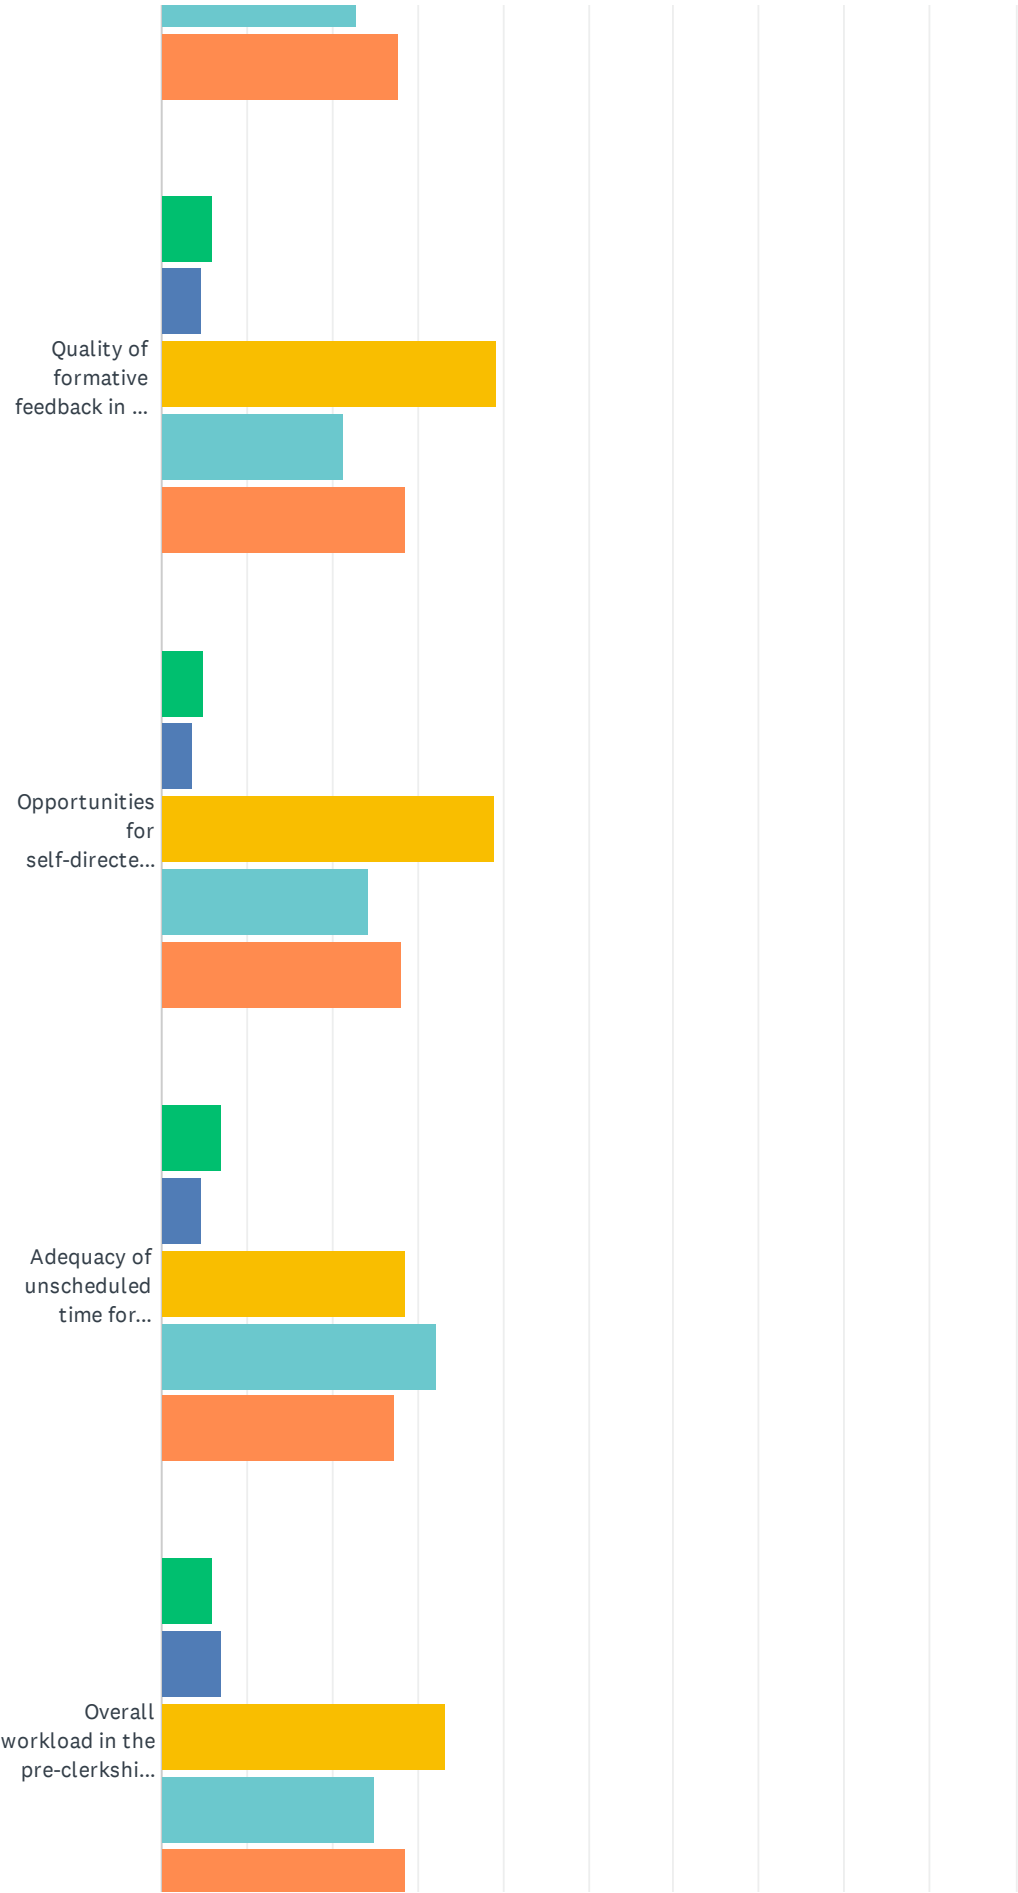

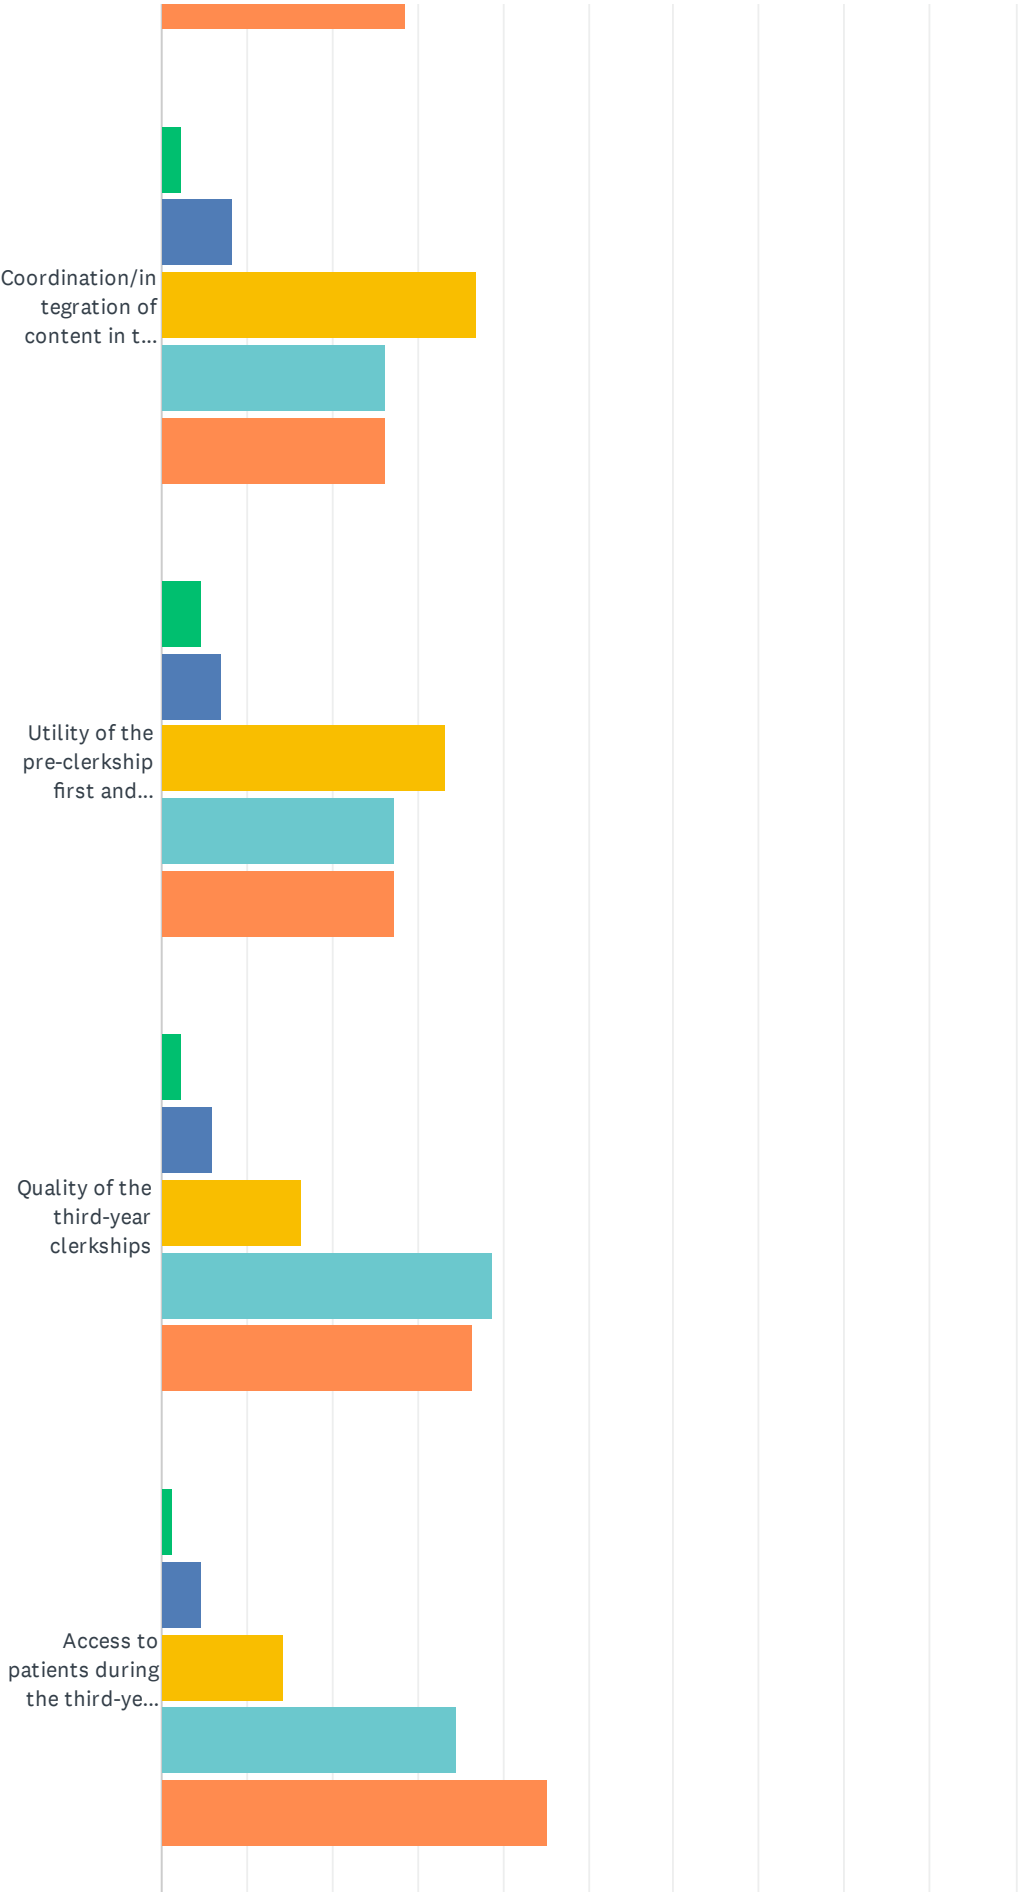

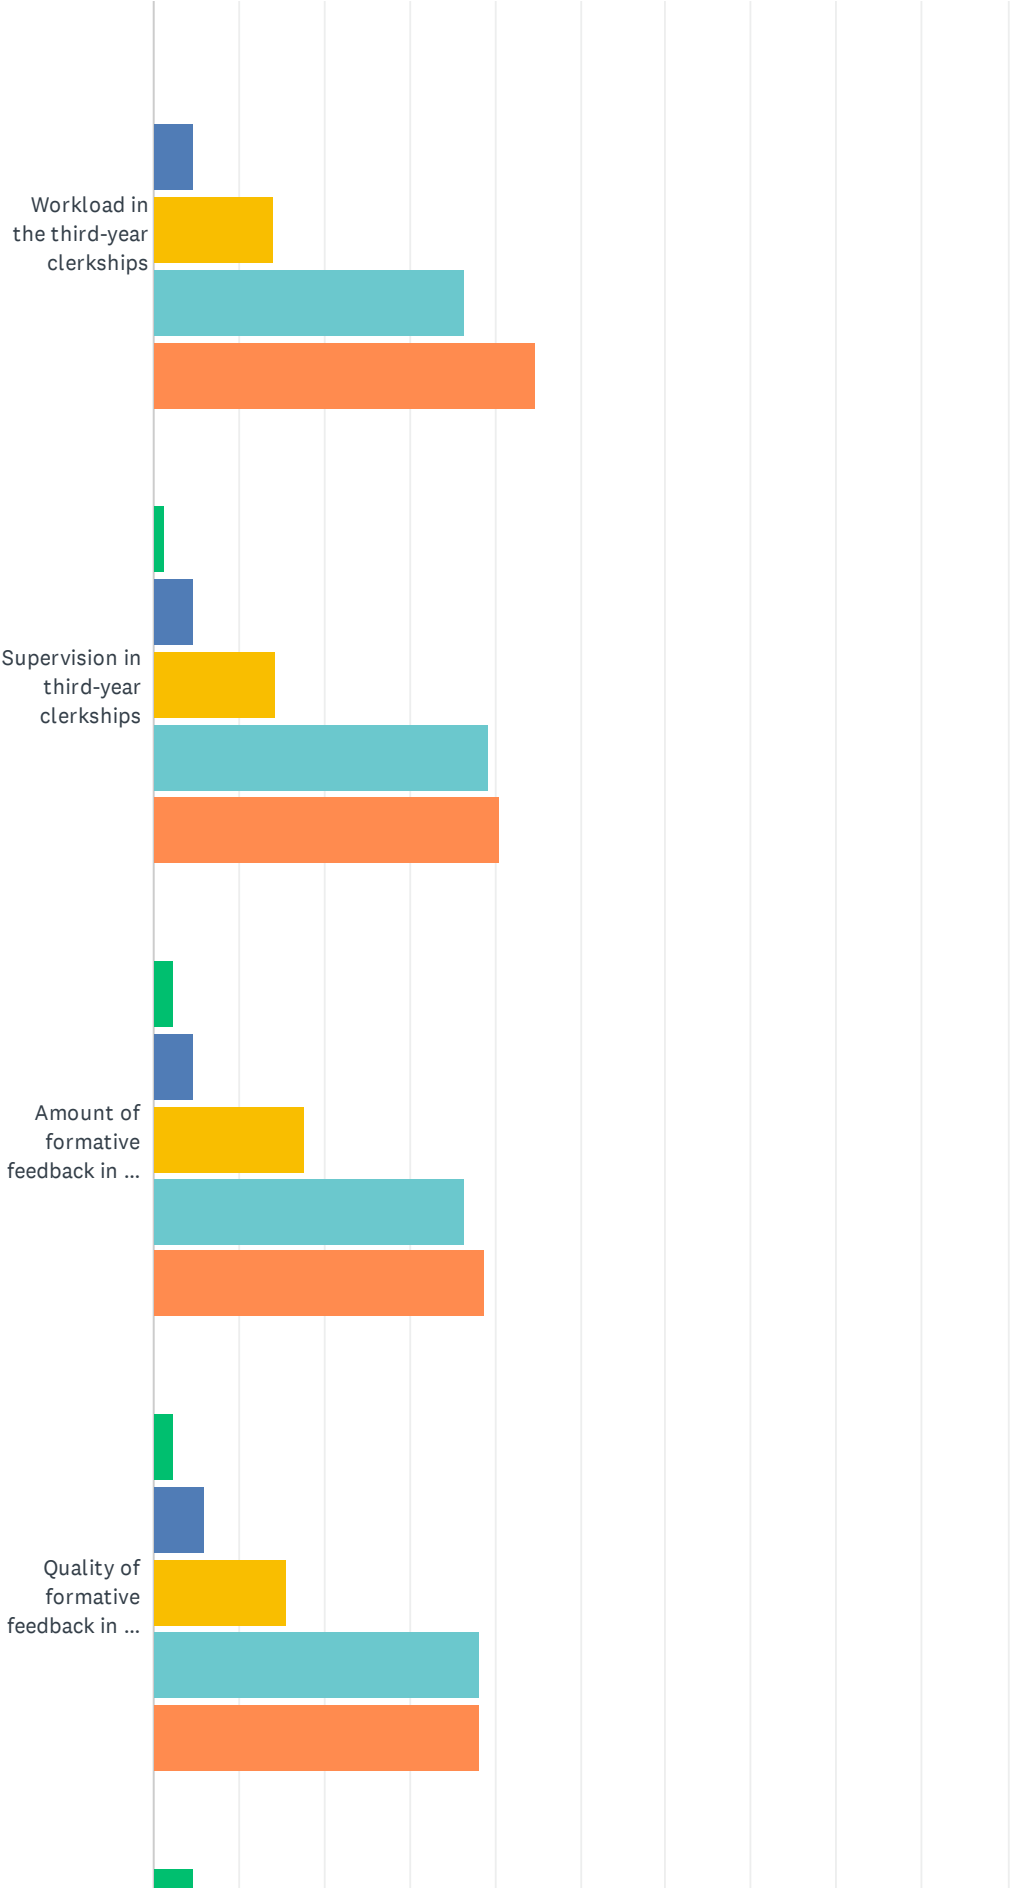

Clinical Science Program - Institutional Self Study Survey 2024

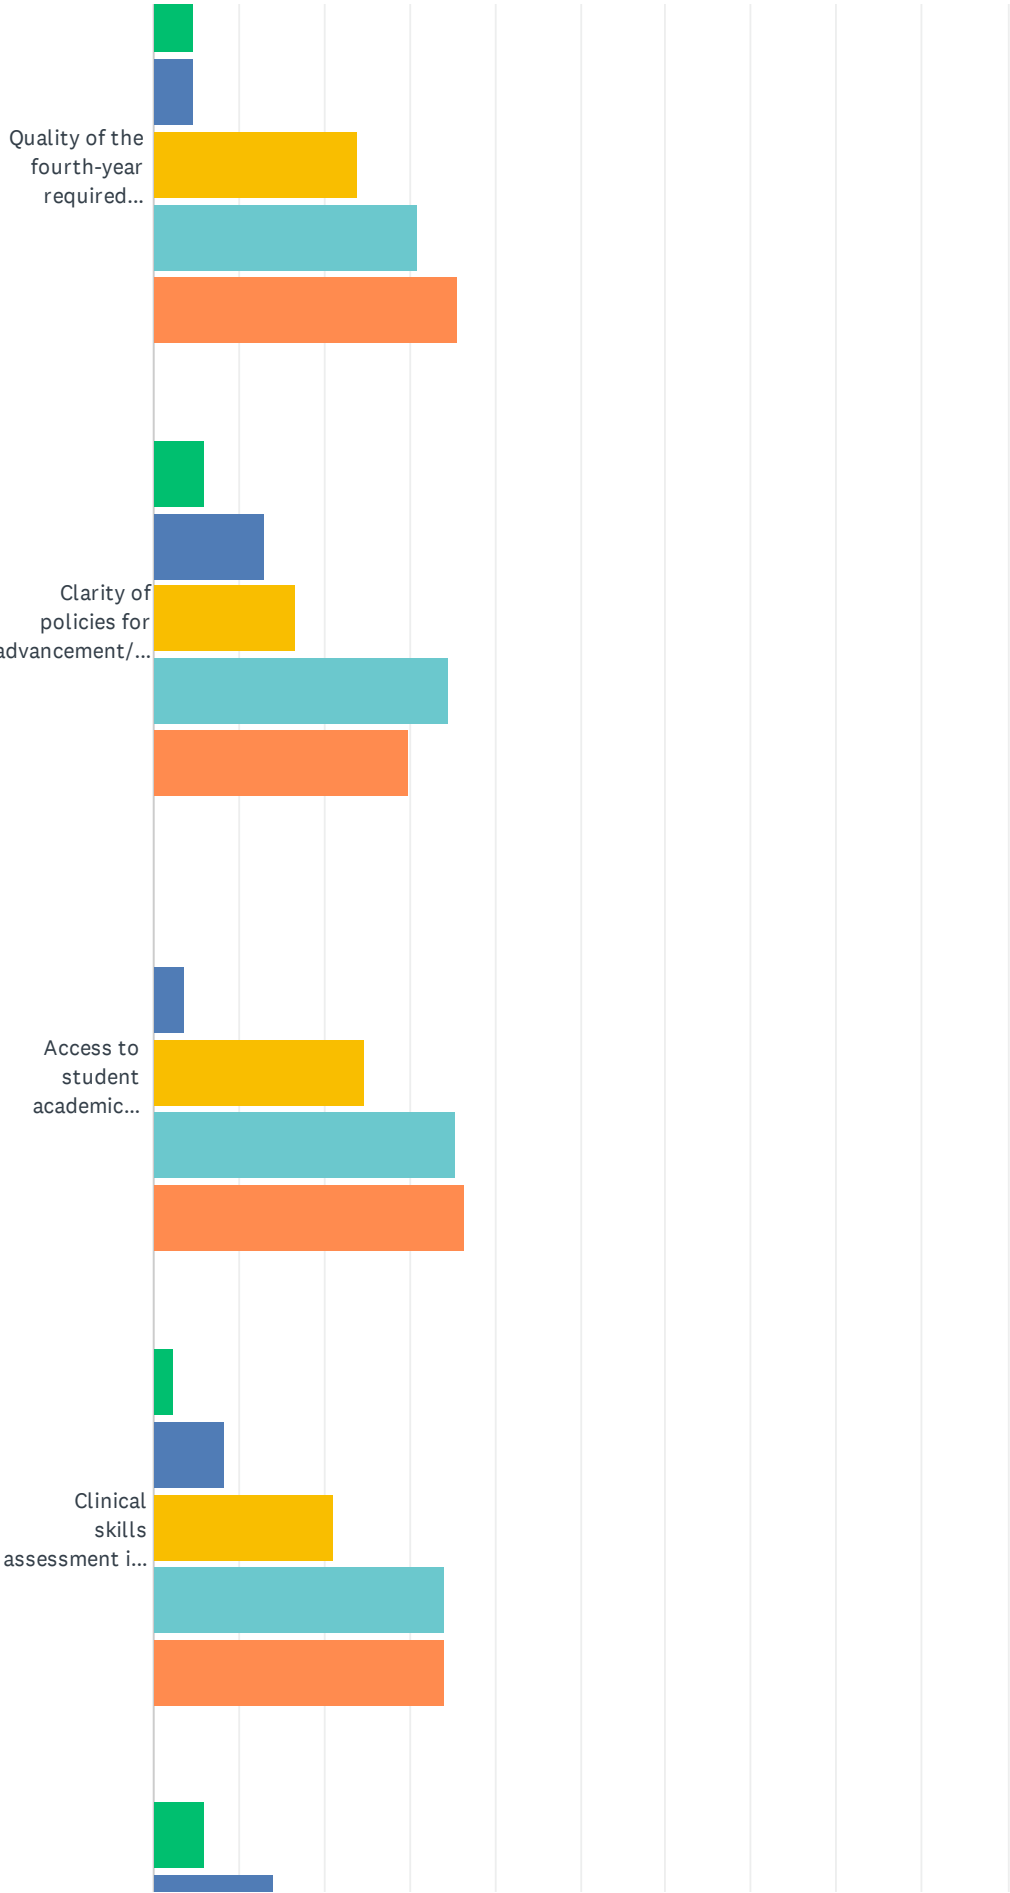



Clinical Science Program - Institutional Self Study Survey 2024

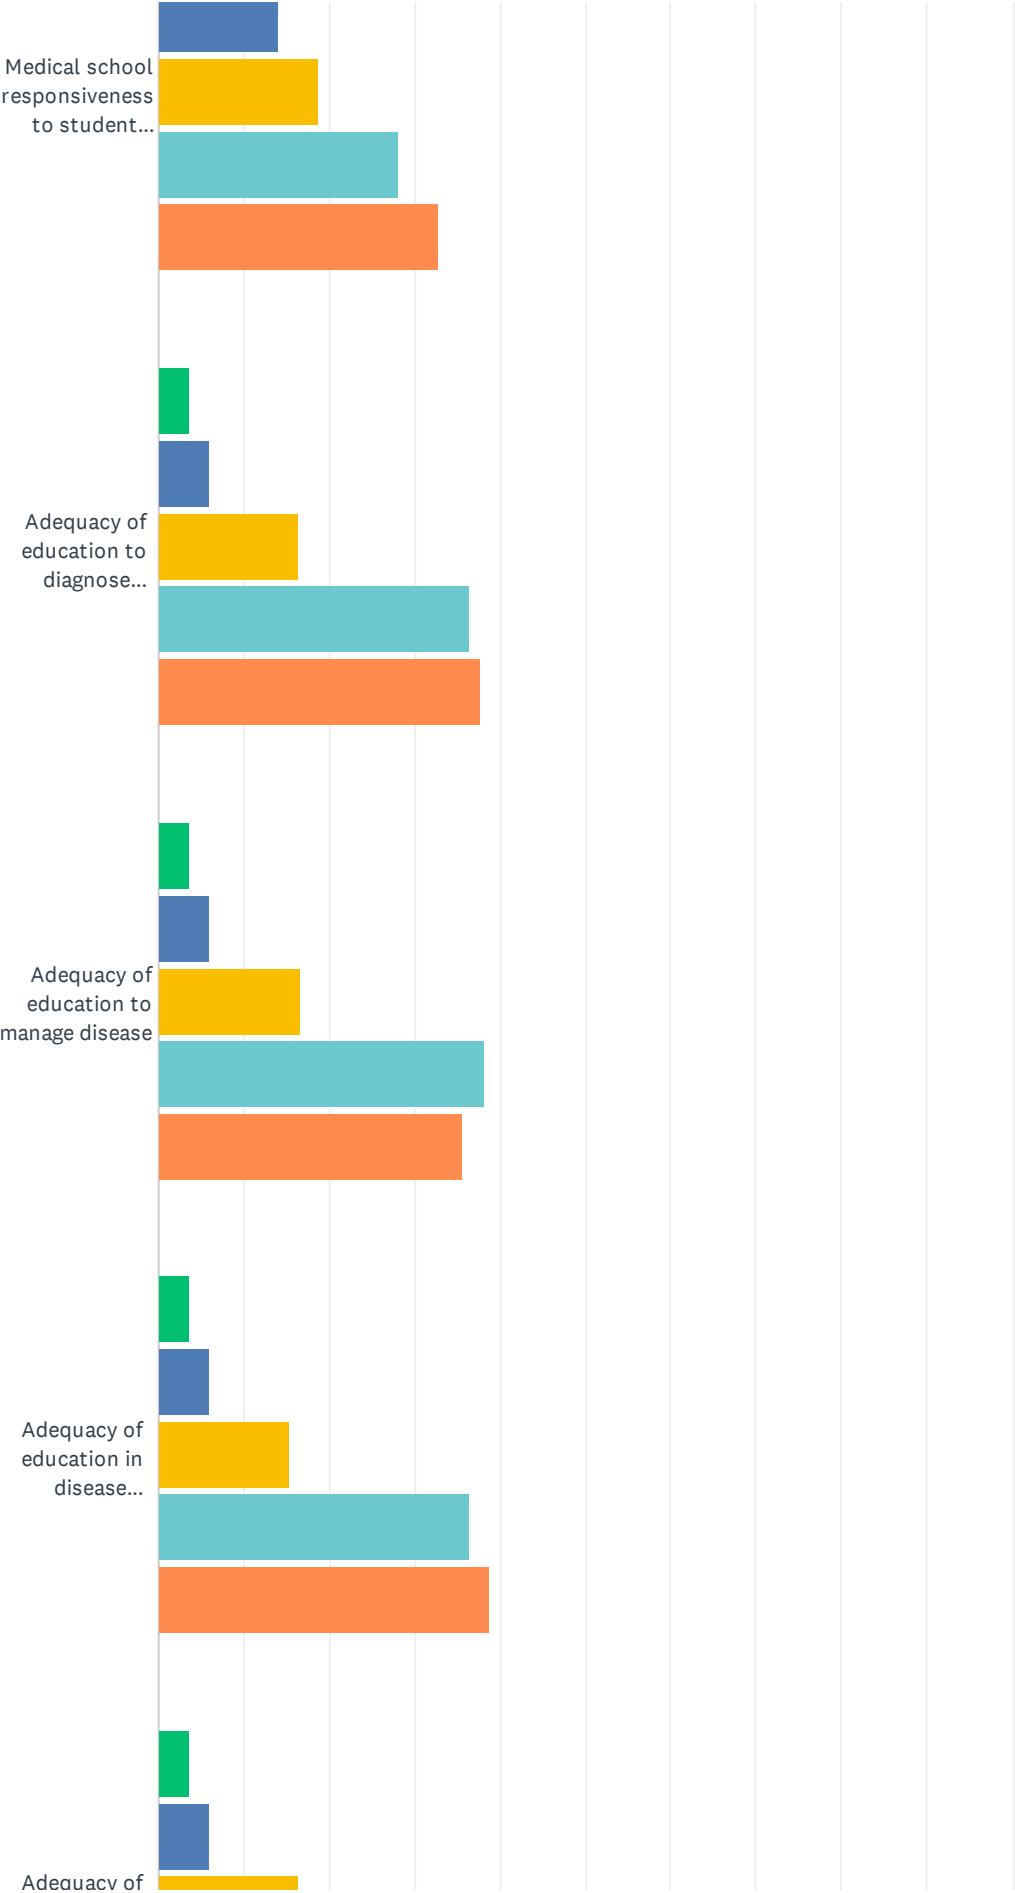

## Clinical Science Program - Institutional Self Study Survey 2024

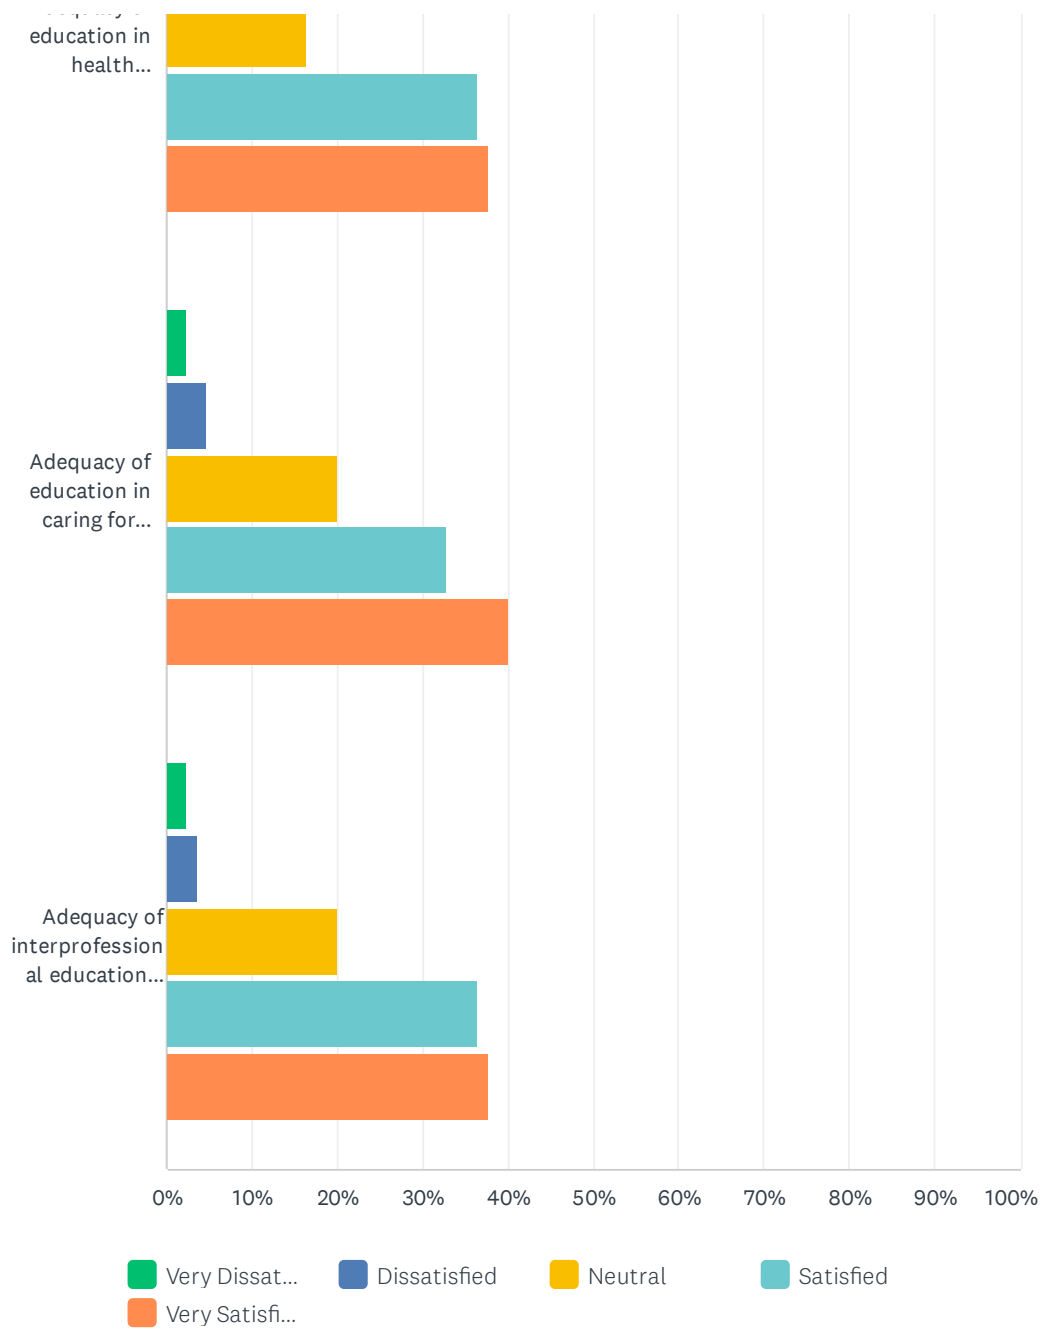

# Clinical Science Program - Institutional Self Study Survey 2024

|                                                                                            | VERY DISSATISFIED | DISSATISFIED | NEUTRAL      | SATISFIED    | VERY SATISFIED | TOTAL | WEIGHTED AVERAGE |
|--------------------------------------------------------------------------------------------|-------------------|--------------|--------------|--------------|----------------|-------|------------------|
| Utility of the medical education programme objectives to support learning                  | 6.02%<br>5        | 4.82%<br>4   | 24.10%<br>20 | 32.53%<br>27 | 32.53%<br>27   | 83    | 3.81             |
| Quality of the pre-clerkship (first year/second year)                                      | 4.76%<br>4        | 4.76%<br>4   | 36.90%<br>31 | 26.19%<br>22 | 27.38%<br>23   | 84    | 3.67             |
| Clinical skills instruction in the pre-clerkship (first/second year)                       | 5.95%<br>5        | 2.38%<br>2   | 35.71%<br>30 | 28.57%<br>24 | 27.38%<br>23   | 84    | 3.69             |
| Amount of formative feedback in the pre-clerkship (first/second years)                     | 4.82%<br>4        | 3.61%<br>3   | 40.96%<br>34 | 22.89%<br>19 | 27.71%<br>23   | 83    | 3.65             |
| Quality of formative feedback in the pre-clerkship (first/second years)                    | 5.95%<br>5        | 4.76%<br>4   | 39.29%<br>33 | 21.43%<br>18 | 28.57%<br>24   | 84    | 3.62             |
| Opportunities for self-directed learning in the pre-clerkship (first/second years)         | 4.88%<br>4        | 3.66%<br>3   | 39.02%<br>32 | 24.39%<br>20 | 28.05%<br>23   | 82    | 3.67             |
| Adequacy of unscheduled time for self-directed learning                                    | 7.14%<br>6        | 4.76%<br>4   | 28.57%<br>24 | 32.14%<br>27 | 27.38%<br>23   | 84    | 3.68             |
| Overall workload in the pre-clerkship (first/second years)                                 | 5.95%<br>5        | 7.14%<br>6   | 33.33%<br>28 | 25.00%<br>21 | 28.57%<br>24   | 84    | 3.63             |
| Coordination/integration of content in the pre clerkship (first/second years)              | 2.38%<br>2        | 8.33%<br>7   | 36.90%<br>31 | 26.19%<br>22 | 26.19%<br>22   | 84    | 3.65             |
| Utility of the pre-clerkship first and second years as preparation for clinical clerkships | 4.76%<br>4        | 7.14%<br>6   | 33.33%<br>28 | 27.38%<br>23 | 27.38%<br>23   | 84    | 3.65             |
| Quality of the third-year clerkships                                                       | 2.35%<br>2        | 5.88%<br>5   | 16.47%<br>14 | 38.82%<br>33 | 36.47%<br>31   | 85    | 4.01             |
| Access to patients during the third-year clerkships                                        | 1.19%<br>1        | 4.76%<br>4   | 14.29%<br>12 | 34.52%<br>29 | 45.24%<br>38   | 84    | 4.18             |
| Workload in the third-year clerkships                                                      | 0.00%<br>0        | 4.71%<br>4   | 14.12%<br>12 | 36.47%<br>31 | 44.71%<br>38   | 85    | 4.21             |
| Supervision in third-year clerkships                                                       | 1.19%<br>1        | 4.76%<br>4   | 14.29%<br>12 | 39.29%<br>33 | 40.48%<br>34   | 84    | 4.13             |
| Amount of formative feedback in the third/fourth years                                     | 2.35%<br>2        | 4.71%<br>4   | 17.65%<br>15 | 36.47%<br>31 | 38.82%<br>33   | 85    | 4.05             |
| Quality of formative feedback in the third/fourth years                                    | 2.38%<br>2        | 5.95%<br>5   | 15.48%<br>13 | 38.10%<br>32 | 38.10%<br>32   | 84    | 4.04             |
| Quality of the fourth-year required clerkships                                             | 4.76%<br>4        | 4.76%<br>4   | 23.81%<br>20 | 30.95%<br>26 | 35.71%<br>30   | 84    | 3.88             |

## Clinical Science Program - Institutional Self Study Survey 2024

|                                                                         |            |              |              |              |              |    |      |
|-------------------------------------------------------------------------|------------|--------------|--------------|--------------|--------------|----|------|
| Clarity of policies for advancement/graduation                          | 5.95%<br>5 | 13.10%<br>11 | 16.67%<br>14 | 34.52%<br>29 | 29.76%<br>25 | 84 | 3.69 |
| Access to student academic records                                      | 0.00%<br>0 | 3.53%<br>3   | 24.71%<br>21 | 35.29%<br>30 | 36.47%<br>31 | 85 | 4.05 |
| Clinical skills assessment in the third/fourth years                    | 2.35%<br>2 | 8.24%<br>7   | 21.18%<br>18 | 34.12%<br>29 | 34.12%<br>29 | 85 | 3.89 |
| Medical school responsiveness to student feedback on courses/clerkships | 5.88%<br>5 | 14.12%<br>12 | 18.82%<br>16 | 28.24%<br>24 | 32.94%<br>28 | 85 | 3.68 |
| Adequacy of education to diagnose disease                               | 3.53%<br>3 | 5.88%<br>5   | 16.47%<br>14 | 36.47%<br>31 | 37.65%<br>32 | 85 | 3.99 |
| Adequacy of education to manage disease                                 | 3.57%<br>3 | 5.95%<br>5   | 16.67%<br>14 | 38.10%<br>32 | 35.71%<br>30 | 84 | 3.96 |
| Adequacy of education in disease prevention                             | 3.53%<br>3 | 5.88%<br>5   | 15.29%<br>13 | 36.47%<br>31 | 38.82%<br>33 | 85 | 4.01 |
| Adequacy of education in health maintenance                             | 3.53%<br>3 | 5.88%<br>5   | 16.47%<br>14 | 36.47%<br>31 | 37.65%<br>32 | 85 | 3.99 |
| Adequacy of education in caring for patients from different backgrounds | 2.35%<br>2 | 4.71%<br>4   | 20.00%<br>17 | 32.94%<br>28 | 40.00%<br>34 | 85 | 4.04 |
| Adequacy of interprofessional education experiences                     | 2.35%<br>2 | 3.53%<br>3   | 20.00%<br>17 | 36.47%<br>31 | 37.65%<br>32 | 85 | 4.04 |
